# Supplementary material
Source: PubMed Central journal article supplement (PMC4646023)
Supplement: 10.1074_M115.678144_jbc.M115.678144-1.pdf [file 10.1074_M115.678144_jbc.M115.678144-1.pdf]

**MASCOT** Mascot Search Results

User : Bob  
 Email : rdenglis@utmb.edu  
 Search title : 11081913.raw #2271 acetylation  
 MS data file : tempfile  
 Database : NCBI nr 20110707 (14481393 sequences; 4958963357 residues)  
 Taxonomy : Mus musculus (house mouse) (143921 sequences)  
 Timestamp : 24 Aug 2011 at 15:46:26 GMT  
 Protein hits : [gi|124248512](#) carbamoyl-phosphate synthase [ammonia], mitochondrial precursor [Mus musculus]  
[gi|14917005](#) RecName: Full=Stress-70 protein, mitochondrial; AltName: Full=75 kDa glucose-regulated protein; Short=GRP-75;  
[gi|84781771](#) trypsin 10 [Mus musculus]  
[gi|12843914](#) unnamed protein product [Mus musculus]  
[gi|12838381](#) unnamed protein product [Mus musculus]  
[gi|3093758](#) cyclic AMP specific phosphodiesterase PDE4D5A [Mus musculus]

NCBI nr [Decoy](#) False discovery rate

Peptide matches above identity threshold 33 3 9.09 %  
 Peptide matches above homology or identity threshold 37 3 8.11 %

**Probability Based Mowse Score**

Ions score is  $-10 \cdot \log(P)$ , where P is the probability that the observed match is a random event. Individual ions scores > 32 indicate identity or extensive homology (p<0.05). Protein scores are derived from ions scores as a non-probabilistic basis for ranking protein hits.

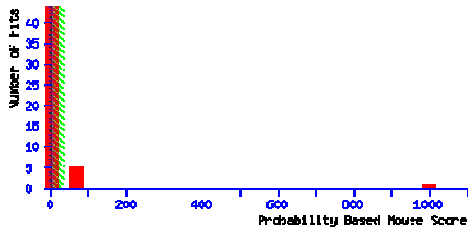

**Peptide Summary Report**

Format As  [Help](#)

Significance threshold p<  Max. number of hits

Standard scoring  MudPIT scoring  Ions score or expect cut-off  Show sub-sets

Show pop-ups  Suppress pop-ups  Sort unassigned   Require bold red

1. [gi|124248512](#) Mass: 164514 Score: 999 Queries matched: 34 emPAI: 0.63  
 carbamoyl-phosphate synthase [ammonia], mitochondrial precursor [Mus musculus]  
 Check to include this hit in error tolerant search or archive report

| Query                | Observed | Mr (expt) | Mr (calc) | Delta   | Miss | Score | Expect   | Rank | Peptide                           |
|----------------------|----------|-----------|-----------|---------|------|-------|----------|------|-----------------------------------|
| b <a href="#">3</a>  | 406.2201 | 810.4257  | 810.4276  | -0.0019 | 0    | 30    | 0.14     | 1    | R.SFPFVSK.T                       |
| b <a href="#">4</a>  | 406.2204 | 810.4263  | 810.4276  | -0.0013 | 0    | (12)  | 8.5      | 1    | R.SFPFVSK.T                       |
| b <a href="#">21</a> | 453.2571 | 904.4996  | 904.5018  | -0.0022 | 0    | (38)  | 0.024    | 1    | K.LFAEAVQK.S                      |
| b <a href="#">22</a> | 453.2573 | 904.4999  | 904.5018  | -0.0019 | 0    | 51    | 0.0011   | 1    | K.LFAEAVQK.S                      |
| b <a href="#">24</a> | 495.2783 | 988.5421  | 988.5441  | -0.0020 | 0    | 58    | 0.00074  | 1    | K.ETLIDLGTK.A                     |
| b <a href="#">26</a> | 508.2394 | 1014.4642 | 1014.4658 | -0.0016 | 0    | 30    | 0.064    | 1    | R.TFEESFQK.A                      |
| b <a href="#">27</a> | 508.8016 | 1015.5887 | 1015.5914 | -0.0027 | 0    | 41    | 0.0079   | 1    | K.GTTITSVLPK.P                    |
| b <a href="#">30</a> | 518.7695 | 1035.5245 | 1035.5237 | 0.0009  | 0    | 43    | 0.0088   | 1    | K.EIEYEVVR.D                      |
| b <a href="#">32</a> | 545.7971 | 1089.5796 | 1089.5819 | -0.0023 | 0    | 46    | 0.0042   | 1    | K.VPAIYGVDR.M                     |
| b <a href="#">33</a> | 551.8077 | 1101.6009 | 1101.6030 | -0.0021 | 0    | 65    | 5e-005   | 1    | K.QNLIAEVSTK.D                    |
| b <a href="#">34</a> | 568.7777 | 1135.5408 | 1135.5431 | -0.0023 | 0    | 63    | 5.7e-005 | 1    | K.VMIGESIDEX.R + Oxidation (M)    |
| b <a href="#">36</a> | 582.3725 | 1162.7305 | 1162.7325 | -0.0020 | 0    | 52    | 3.1e-005 | 1    | K.IALGIPLPEIK.N                   |
| b <a href="#">41</a> | 609.3103 | 1216.6059 | 1216.6088 | -0.0028 | 0    | 60    | 0.00016  | 1    | K.SLGLQWQEEK.V                    |
| b <a href="#">43</a> | 611.3385 | 1220.6624 | 1220.6652 | -0.0029 | 0    | 64    | 3.9e-005 | 1    | R.SIFSVALDELK.V                   |
| b <a href="#">44</a> | 611.8440 | 1221.6735 | 1221.6757 | -0.0022 | 0    | 51    | 0.00061  | 1    | K.ATGYPLAFIAK.I                   |
| b <a href="#">46</a> | 623.8258 | 1245.6370 | 1245.6387 | -0.0017 | 0    | 56    | 0.00039  | 1    | K.IMGTSPLQIDR.A + Oxidation (M)   |
| b <a href="#">49</a> | 639.8492 | 1277.6838 | 1277.6867 | -0.0029 | 0    | 72    | 7.3e-006 | 1    | K.TLGVDFIDVATK.V                  |
| b <a href="#">50</a> | 649.8332 | 1297.6517 | 1297.6554 | -0.0036 | 0    | 57    | 0.00023  | 1    | K.LYFEELSLEK.I                    |
| b <a href="#">54</a> | 661.8407 | 1321.6668 | 1321.6700 | -0.0032 | 0    | 60    | 0.00011  | 1    | K.AADTIGYFVPIR.S + Oxidation (M)  |
| b <a href="#">60</a> | 677.3660 | 1352.7174 | 1352.7160 | 0.0014  | 0    | 68    | 1.7e-005 | 1    | R.GQNQPVLNITNR.Q                  |
| b <a href="#">65</a> | 704.8631 | 1407.7116 | 1407.7180 | -0.0064 | 0    | (51)  | 0.00088  | 1    | K.AFAMTNQILVER.S + Oxidation (M)  |
| b <a href="#">66</a> | 704.8696 | 1407.7246 | 1407.7180 | 0.0066  | 0    | 73    | 5.1e-006 | 1    | K.AFAMTNQILVER.S + Oxidation (M)  |
| b <a href="#">68</a> | 710.8476 | 1419.6806 | 1419.6841 | -0.0035 | 0    | 84    | 4.7e-007 | 1    | K.GLNDSVTEETLR.K                  |
| b <a href="#">74</a> | 760.3725 | 1518.7304 | 1518.7348 | -0.0044 | 0    | 72    | 5.9e-006 | 1    | K.ALENNMSLDEIVR.L + Oxidation (M) |

|   |                     |          |           |           |         |   |      |          |   |                                         |
|---|---------------------|----------|-----------|-----------|---------|---|------|----------|---|-----------------------------------------|
| b | <a href="#">82</a>  | 526.6109 | 1576.8108 | 1576.8096 | 0.0012  | 1 | 19   | 1.3      | 1 | R.QLFSDKLNINEK.I                        |
| b | <a href="#">84</a>  | 530.2740 | 1587.8003 | 1587.8045 | -0.0042 | 0 | 16   | 2.6      | 1 | R.FLGVAEQLHNEGFK.L                      |
| b | <a href="#">86</a>  | 812.3974 | 1622.7803 | 1622.7861 | -0.0058 | 0 | 86   | 2.5e-007 | 1 | K.IAPSFVAVESMEDALK.A + Oxidation (M)    |
| b | <a href="#">87</a>  | 812.4010 | 1622.7875 | 1622.7822 | 0.0054  | 0 | 120  | 1e-010   | 1 | K.VLGTSVESIMATEDR.Q + Oxidation (M)     |
| b | <a href="#">88</a>  | 812.4048 | 1622.7949 | 1622.7861 | 0.0088  | 0 | (71) | 7.6e-006 | 1 | K.IAPSFVAVESMEDALK.A + Oxidation (M)    |
| b | <a href="#">96</a>  | 862.4102 | 1722.8059 | 1722.8101 | -0.0042 | 0 | 80   | 6.5e-007 | 1 | K.IEFEGQSVDFVDPNK.Q                     |
| b | <a href="#">97</a>  | 863.9507 | 1725.8868 | 1725.8897 | -0.0029 | 0 | 79   | 9.3e-007 | 1 | R.DGSIDLVLINLNNNTK.F                    |
| b | <a href="#">98</a>  | 576.6102 | 1726.8089 | 1726.8083 | 0.0006  | 1 | 17   | 1.3      | 1 | R.DELGLNKYMESDGK.V + Oxidation (M)      |
| b | <a href="#">111</a> | 682.0283 | 2043.0632 | 2043.0670 | -0.0039 | 0 | 56   | 0.00013  | 1 | K.TVLMNPNIASVQTNEVGLK.Q + Oxidation (M) |
| b | <a href="#">151</a> | 936.4723 | 2806.3952 | 2806.4025 | -0.0073 | 1 | 59   | 3.5e-005 | 1 | K.IEFEGQSVDFVDPNKQLIAEVSTK.D            |

2. [gi|14917005](#) Mass: 73483 Score: 99 Queries matched: 1 emPAI: 0.04  
 RecName: Full=Stress-70 protein, mitochondrial; AltName: Full=75 kDa glucose-regulated protein; Short=GRP-75; AltName: Full=Heat shock  
 e Check to include this hit in error tolerant search or archive report

| Query | Observed            | Mr(expt) | Mr(calc)  | Delta     | Miss    | Score | Expect | Rank     | Peptide |                       |
|-------|---------------------|----------|-----------|-----------|---------|-------|--------|----------|---------|-----------------------|
| b     | <a href="#">108</a> | 904.9530 | 1807.8915 | 1807.8952 | -0.0037 | 0     | 99     | 9.1e-009 | 1       | K.SQVFSTAADGQTQVEIK.V |

Proteins matching the same set of peptides:  
[gi|74204605](#) Mass: 73446 Score: 99 Queries matched: 1  
 unnamed protein product [Mus musculus]  
[gi|74205924](#) Mass: 63924 Score: 99 Queries matched: 1  
 unnamed protein product [Mus musculus]  
[gi|74225724](#) Mass: 73431 Score: 99 Queries matched: 1  
 unnamed protein product [Mus musculus]  
[gi|162461907](#) Mass: 73416 Score: 99 Queries matched: 1  
 stress-70 protein, mitochondrial [Mus musculus]

3. [gi|84781771](#) Mass: 26204 Score: 94 Queries matched: 3 emPAI: 0.26  
 trypsin 10 [Mus musculus]  
 e Check to include this hit in error tolerant search or archive report

| Query | Observed           | Mr(expt) | Mr(calc)  | Delta     | Miss    | Score | Expect | Rank     | Peptide |                                 |
|-------|--------------------|----------|-----------|-----------|---------|-------|--------|----------|---------|---------------------------------|
| b     | <a href="#">37</a> | 588.3176 | 1174.6207 | 1174.6267 | -0.0061 | 0     | (62)   | 0.0001   | 1       | K.TLNDNDIMLIK.L                 |
| b     | <a href="#">39</a> | 596.3170 | 1190.6195 | 1190.6217 | -0.0021 | 0     | 63     | 8.2e-005 | 1       | K.TLNDNDIMLIK.L + Oxidation (M) |
| b     | <a href="#">52</a> | 655.3216 | 1308.6286 | 1308.6206 | 0.0079  | 0     | 5      | 35       | 9       | K.NMICVGFLEGGK.D + Acetyl (K)   |

4. [gi|12843914](#) Mass: 29993 Score: 79 Queries matched: 1 emPAI: 0.11  
 unnamed protein product [Mus musculus]  
 e Check to include this hit in error tolerant search or archive report

| Query | Observed           | Mr(expt) | Mr(calc)  | Delta     | Miss    | Score | Expect | Rank     | Peptide |                  |
|-------|--------------------|----------|-----------|-----------|---------|-------|--------|----------|---------|------------------|
| b     | <a href="#">51</a> | 651.8597 | 1301.7048 | 1301.7078 | -0.0031 | 0     | 79     | 1.4e-006 | 1       | R.SLDDLSIIAEVK.A |

Proteins matching the same set of peptides:  
[gi|13272554](#) Mass: 42357 Score: 79 Queries matched: 1  
 cytokeratin KRT2-6HF [Mus musculus]  
[gi|16303309](#) Mass: 61743 Score: 79 Queries matched: 1  
 type II keratin 5 [Mus musculus]  
[gi|20911031](#) Mass: 61729 Score: 79 Queries matched: 1  
 keratin, type II cytoskeletal 5 [Mus musculus]  
[gi|29789317](#) Mass: 59704 Score: 79 Queries matched: 1  
 keratin, type II cytoskeletal 75 [Mus musculus]  
[gi|54607171](#) Mass: 59299 Score: 79 Queries matched: 1  
 keratin, type II cytoskeletal 6A [Mus musculus]  
[gi|59798479](#) Mass: 60285 Score: 79 Queries matched: 1  
 RecName: Full=Keratin, type II cytoskeletal 6B; AltName: Full=Cytokeratin-6B; Short=CK-6B; AltName: Full=Keratin-6-beta; Short=mK6-bet  
[gi|110645788](#) Mass: 60236 Score: 79 Queries matched: 1  
 Krt6b protein [Mus musculus]  
[gi|113195684](#) Mass: 59490 Score: 79 Queries matched: 1  
 keratin, type II cytoskeletal 6B [Mus musculus]  
[gi|116063325](#) Mass: 60154 Score: 79 Queries matched: 1  
 Krt6b protein [Mus musculus]  
[gi|148672084](#) Mass: 34775 Score: 79 Queries matched: 1  
 mCG17577 [Mus musculus]  
[gi|148672085](#) Mass: 38119 Score: 79 Queries matched: 1  
 mCG144996 [Mus musculus]  
[gi|148672089](#) Mass: 62241 Score: 79 Queries matched: 1  
 keratin 75 [Mus musculus]

5. [gi|12838381](#) Mass: 29379 Score: 40 Queries matched: 2 emPAI: 0.11  
 unnamed protein product [Mus musculus]  
 e Check to include this hit in error tolerant search or archive report

| Query              | Observed | Mr(expt) | Mr(calc) | Delta   | Miss | Score | Expect | Rank | Peptide                  |
|--------------------|----------|----------|----------|---------|------|-------|--------|------|--------------------------|
| <a href="#">21</a> | 453.2571 | 904.4996 | 904.5018 | -0.0022 | 1    | (31)  | 0.12   | 2    | R.IFAQEKK.L + Acetyl (K) |
| <a href="#">22</a> | 453.2573 | 904.4999 | 904.5018 | -0.0018 | 1    | 40    | 0.015  | 2    | R.IFAQEKK.L + Acetyl (K) |

Proteins matching the same set of peptides:

[gi|148705305](#) Mass: 16801 Score: 40 Queries matched: 2  
 mCG11633, isoform CRA\_d [Mus musculus]  
[gi|188219642](#) Mass: 29451 Score: 40 Queries matched: 2  
 dnaI homolog subfamily B member 6 isoform b [Mus musculus]

6. [gi|3093758](#) Mass: 23890 Score: 36 Queries matched: 1 emPAI: 0.13  
 cyclic AMP specific phosphodiesterase PDE4D5A [Mus musculus]  
 e Check to include this hit in error tolerant search or archive report

| Query                | Observed | Mr(expt) | Mr(calc) | Delta   | Miss | Score | Expect | Rank | Peptide      |
|----------------------|----------|----------|----------|---------|------|-------|--------|------|--------------|
| b <a href="#">17</a> | 434.7656 | 867.5166 | 867.5178 | -0.0011 | 0    | 36    | 0.013  | 1    | K.LSPVISPR.N |

Proteins matching the same set of peptides:

[gi|148686495](#) Mass: 79441 Score: 36 Queries matched: 1  
 phosphodiesterase 4D, cAMP specific, isoform CRA\_c [Mus musculus]

Peptide matches not assigned to protein hits: (no details means no match)

| Query                 | Observed | Mr(expt)  | Mr(calc)  | Delta   | Miss | Score | Expect | Rank | Peptide                                                     |
|-----------------------|----------|-----------|-----------|---------|------|-------|--------|------|-------------------------------------------------------------|
| b <a href="#">11</a>  | 421.7575 | 841.5005  | 841.4810  | 0.0195  | 0    | 30    | 0.15   | 1    | LGTWLPR                                                     |
| b <a href="#">9</a>   | 421.7574 | 841.5003  | 841.4810  | 0.0193  | 0    | 28    | 0.25   | 1    | LGTWLPR                                                     |
| b <a href="#">8</a>   | 421.7567 | 841.4988  | 841.4810  | 0.0177  | 0    | 25    | 0.46   | 1    | LGTWLPR                                                     |
| b <a href="#">80</a>  | 783.8719 | 1565.7292 | 1565.7184 | 0.0108  | 1    | 25    | 0.25   | 1    | EKDFQGMLEYHK + Acetyl (K)                                   |
| b <a href="#">10</a>  | 421.7575 | 841.5004  | 841.4810  | 0.0194  | 0    | 25    | 0.52   | 1    | LGTWLPR                                                     |
| b <a href="#">12</a>  | 421.7579 | 841.5013  | 841.5021  | -0.0008 | 1    | 23    | 0.77   | 1    | VKTSLPR + Acetyl (K)                                        |
| b <a href="#">42</a>  | 611.3076 | 1220.6007 | 1220.6037 | -0.0030 | 0    | 23    | 0.73   | 1    | FEGAQSVVQEK                                                 |
| b <a href="#">13</a>  | 421.7586 | 841.5025  | 841.5021  | 0.0004  | 1    | 23    | 0.85   | 1    | VKTSLPR + Acetyl (K)                                        |
| b <a href="#">77</a>  | 769.3227 | 1536.6309 | 1536.6258 | 0.0050  | 1    | 21    | 0.1    | 1    | MVSSGMYKMDNGK + Acetyl (Protein N-term); 3 Oxidation (M)    |
| b <a href="#">62</a>  | 688.8440 | 1375.6734 | 1375.6700 | 0.0034  | 1    | 21    | 0.96   | 1    | RMMEVAADVQR                                                 |
| b <a href="#">118</a> | 737.7040 | 2210.0902 | 2210.0967 | -0.0065 | 0    | 21    | 0.43   | 1    | LGEHNINLVLEGNEQFIDAAK                                       |
| b <a href="#">119</a> | 737.7041 | 2210.0904 | 2210.0967 | -0.0063 | 0    | 20    | 0.51   | 1    | LGEHNINLVLEGNEQFIDAAK                                       |
| b <a href="#">90</a>  | 820.3950 | 1638.7755 | 1638.7745 | 0.0009  | 1    | 20    | 0.78   | 1    | IQMEKFKMAANPSK + Oxidation (M)                              |
| b <a href="#">79</a>  | 780.8968 | 1559.7790 | 1559.7654 | 0.0137  | 0    | 19    | 1.3    | 1    | QWELLCDDLEQDK                                               |
| b <a href="#">124</a> | 737.7048 | 2210.0925 | 2210.0967 | -0.0042 | 0    | 19    | 0.68   | 1    | LGEHNINLVLEGNEQFIDAAK                                       |
| b <a href="#">85</a>  | 804.8985 | 1607.7824 | 1607.7825 | -0.0001 | 1    | 18    | 1.5    | 1    | QKQDETQTISLTK                                               |
| b <a href="#">53</a>  | 655.8552 | 1309.6958 | 1309.6878 | 0.0080  | 1    | 18    | 1.5    | 1    | KGSALDPEPQVK + Acetyl (K)                                   |
| b <a href="#">92</a>  | 837.3882 | 1672.7618 | 1672.7693 | -0.0075 | 0    | 18    | 0.94   | 1    | DSEGDTPSLINWFSR                                             |
| b <a href="#">122</a> | 737.7043 | 2210.0912 | 2210.0967 | -0.0055 | 0    | 18    | 0.89   | 1    | LGEHNINLVLEGNEQFIDAAK                                       |
| b <a href="#">35</a>  | 570.2702 | 1138.5259 | 1138.5189 | 0.0069  | 1    | 18    | 1.7    | 1    | GMAEAEERGF + Oxidation (M)                                  |
| b <a href="#">31</a>  | 536.3229 | 1070.6311 | 1070.6196 | 0.0115  | 1    | 18    | 1.2    | 1    | DLQLRVTAR                                                   |
| b <a href="#">45</a>  | 617.3082 | 1232.6018 | 1232.6149 | -0.0131 | 1    | 17    | 2.6    | 1    | KSEAPGAFQTR + Acetyl (K)                                    |
| b <a href="#">15</a>  | 428.7647 | 855.5148  | 855.5178  | -0.0029 | 0    | 17    | 2.2    | 1    | EAAALIALR                                                   |
| b <a href="#">52</a>  | 655.3216 | 1308.6286 | 1308.6271 | 0.0015  | 0    | 17    | 2      | 1    | MELGELLYNK + Acetyl (K); Acetyl (Protein N-term); Oxidation |
| b <a href="#">57</a>  | 669.8388 | 1337.6631 | 1337.6616 | 0.0016  | 0    | 17    | 2.4    | 1    | GFPGLPGSPGEGK + Acetyl (K)                                  |
| b <a href="#">47</a>  | 625.3053 | 1248.5960 | 1248.6020 | -0.0060 | 1    | 16    | 2.8    | 1    | LKSGMSPQSK + Acetyl (K); Oxidation (M)                      |
| b <a href="#">117</a> | 737.7030 | 2210.0872 | 2210.0967 | -0.0095 | 0    | 16    | 1.5    | 1    | LGEHNINLVLEGNEQFIDAAK                                       |
| b <a href="#">23</a>  | 459.2761 | 916.5377  | 916.5382  | -0.0004 | 1    | 15    | 2.5    | 1    | GKAFGLLK + 2 Acetyl (K)                                     |
| b <a href="#">16</a>  | 428.7670 | 855.5193  | 855.5112  | 0.0081  | 1    | 15    | 3.3    | 1    | ALRMLPR                                                     |
| b <a href="#">38</a>  | 595.3264 | 1188.6383 | 1188.6462 | -0.0080 | 1    | 15    | 3.7    | 1    | ITDTISDRLR                                                  |
| b <a href="#">28</a>  | 510.7709 | 1019.5273 | 1019.5321 | -0.0048 | 1    | 15    | 5.4    | 1    | VAKMTVSGK + 2 Acetyl (K); Oxidation (M)                     |
| b <a href="#">121</a> | 737.7043 | 2210.0912 | 2210.0967 | -0.0055 | 0    | 14    | 2.2    | 1    | LGEHNINLVLEGNEQFIDAAK                                       |
| b <a href="#">100</a> | 864.4420 | 1726.8694 | 1726.8638 | 0.0055  | 1    | 14    | 4.4    | 1    | GLEWIGRIDPNDGGTK                                            |
| b <a href="#">123</a> | 737.7047 | 2210.0924 | 2210.0967 | -0.0043 | 0    | 13    | 2.3    | 1    | LGEHNINLVLEGNEQFIDAAK                                       |
| b <a href="#">125</a> | 737.7051 | 2210.0934 | 2210.0967 | -0.0033 | 0    | 13    | 2.5    | 1    | LGEHNINLVLEGNEQFIDAAK                                       |
| b <a href="#">40</a>  | 597.7979 | 1193.5813 | 1193.5863 | -0.0050 | 0    | 13    | 6.9    | 1    | MDASLGNLFAR                                                 |
| b <a href="#">67</a>  | 710.8361 | 1419.6577 | 1419.6453 | 0.0125  | 0    | 13    | 4.5    | 1    | LESSGCSGGVNWPK                                              |
| b <a href="#">48</a>  | 631.8247 | 1261.6349 | 1261.6277 | 0.0072  | 1    | 13    | 7.9    | 1    | LYGSFNFRMK                                                  |
| b <a href="#">18</a>  | 435.7731 | 869.5316  | 869.5123  | 0.0193  | 0    | 11    | 7.1    | 1    | VSLWLPR                                                     |
| b <a href="#">64</a>  | 701.3595 | 1400.7044 | 1400.6936 | 0.0108  | 0    | 11    | 10     | 1    | DEVTWVAGDVIR + Acetyl (Protein N-term)                      |
| b <a href="#">70</a>  | 712.8628 | 1423.7110 | 1423.7129 | -0.0019 | 1    | 11    | 8.1    | 1    | SMPSLDFSGRLSK                                               |
| b <a href="#">99</a>  | 864.4410 | 1726.8674 | 1726.8638 | 0.0035  | 1    | 11    | 9      | 1    | GLEWIGRIDPNDGGTK                                            |
| b <a href="#">59</a>  | 673.8514 | 1345.6883 | 1345.6734 | 0.0150  | 1    | 10    | 13     | 1    | MLQDVQMPQK + Acetyl (K)                                     |
| b <a href="#">19</a>  | 435.7740 | 869.5335  | 869.5334  | 0.0001  | 1    | 10    | 9      | 1    | VVVVEKR + Acetyl (K)                                        |
| b <a href="#">120</a> | 737.7041 | 2210.0906 | 2210.0967 | -0.0061 | 0    | 9     | 7      | 1    | LGEHNINLVLEGNEQFIDAAK                                       |
| b <a href="#">126</a> | 738.0335 | 2211.0785 | 2211.0920 | -0.0135 | 0    | 9     | 6.9    | 1    | LGEHNINLVLEGNEQFVNSAK                                       |
| b <a href="#">78</a>  | 774.8640 | 1547.7135 | 1547.7137 | -0.0002 | 0    | 8     | 11     | 1    | QLEDAIEDCTNAVK                                              |
| b <a href="#">91</a>  | 830.9283 | 1659.8421 | 1659.8250 | 0.0171  | 1    | 8     | 13     | 1    | TSVHQETKSMLLDR + Oxidation (M)                              |
| b <a href="#">102</a> | 882.8930 | 1763.7713 | 1763.7616 | 0.0098  | 1    | 8     | 5.3    | 1    | MQMPWNSNPMCKTR + Acetyl (K); Oxidation (M)                  |
| b <a href="#">63</a>  | 696.8414 | 1391.6683 | 1391.6867 | -0.0184 | 0    | 8     | 20     | 1    | GTILPASNFDMAR                                               |
| b <a href="#">25</a>  | 505.2683 | 1008.5220 | 1008.5136 | 0.0083  | 0    | 7     | 24     | 1    | MVSGFIPMK                                                   |
| b <a href="#">76</a>  | 768.3708 | 1534.7269 | 1534.7376 | -0.0106 | 0    | 7     | 17     | 1    | AELPNGHAQSLGK + Acetyl (K)                                  |
| b <a href="#">73</a>  | 752.8660 | 1503.7174 | 1503.7317 | -0.0143 | 1    | 7     | 21     | 1    | DGIQTKEHPNPGK + 2 Acetyl (K)                                |
| b <a href="#">29</a>  | 512.2384 | 1022.4623 | 1022.4629 | -0.0005 | 0    | 7     | 21     | 1    | SVENGSSSTR                                                  |
| b <a href="#">69</a>  | 711.3399 | 1420.6653 | 1420.6722 | -0.0069 | 1    | 6     | 21     | 1    | SKDSSPSYLPK + 2 Acetyl (K)                                  |
| b <a href="#">127</a> | 738.0386 | 2211.0940 | 2211.0742 | 0.0197  | 1    | 6     | 12     | 1    | VESGFHQHGLSELRAMDK + Acetyl (K); Oxidation (M)              |

|   |                     |           |           |           |         |   |   |          |   |                                                         |
|---|---------------------|-----------|-----------|-----------|---------|---|---|----------|---|---------------------------------------------------------|
| b | <a href="#">106</a> | 897.9082  | 1793.8019 | 1793.8036 | -0.0017 | 1 | 6 | 12       | 1 | KMAECLSESHAQSTTR + Oxidation (M)                        |
| b | <a href="#">142</a> | 762.7132  | 2285.1177 | 2285.1301 | -0.0124 | 1 | 5 | 16       | 1 | DPAGHRAAAILHGGSPDFVGNK + Acetyl (K)                     |
| b | <a href="#">75</a>  | 760.8651  | 1519.7157 | 1519.7197 | -0.0039 | 1 | 5 | 26       | 1 | VCAETHCSMLLK + Acetyl (K); Oxidation (M)                |
| b | <a href="#">89</a>  | 820.3943  | 1638.7740 | 1638.7606 | 0.0133  | 1 | 5 | 26       | 1 | PLCGSDGRTYAQICR                                         |
| b | <a href="#">83</a>  | 790.8885  | 1579.7625 | 1579.7776 | -0.0152 | 1 | 4 | 39       | 1 | SFVSVALQKQNNMR + Acetyl (K); Oxidation (M)              |
| b | <a href="#">139</a> | 762.0572  | 2283.1499 | 2283.1442 | 0.0057  | 1 | 4 | 18       | 1 | QTSSKSQVNIVTSTLLTSTSDS                                  |
| b | <a href="#">103</a> | 887.9500  | 1773.8854 | 1773.8819 | 0.0036  | 1 | 4 | 38       | 1 | KGDLLDAINSCVTVDK + 2 Acetyl (K)                         |
| b | <a href="#">114</a> | 732.0281  | 2193.0626 | 2193.0711 | -0.0085 | 0 | 3 | 23       | 1 | EMPVQFQVVELPSGHHLCK + Oxidation (M)                     |
| b | <a href="#">149</a> | 767.7172  | 2300.1298 | 2300.1156 | 0.0143  | 1 | 3 | 27       | 1 | ECYPRAMHCIFVGAQSLFLK + Oxidation (M)                    |
| b | <a href="#">94</a>  | 559.9082  | 1676.7028 | 1676.7022 | 0.0007  | 0 | 3 | 8.6      | 1 | MDDCHSALEQLTEK + Acetyl (Protein N-term); Oxidation (M) |
| b | <a href="#">6</a>   | 412.7524  | 823.4903  | 823.4916  | -0.0013 | 0 | 2 | 26       | 1 | AVLSHGLK                                                |
| b | <a href="#">109</a> | 970.9696  | 1939.9246 | 1939.9230 | 0.0016  | 1 | 2 | 35       | 1 | LMEMEQLTSSLRETEK + Oxidation (M)                        |
| b | <a href="#">95</a>  | 857.4052  | 1712.7959 | 1712.7981 | -0.0021 | 0 | 2 | 37       | 1 | FENDAAMVQSWFR                                           |
| b | <a href="#">132</a> | 742.7034  | 2225.0885 | 2225.0787 | 0.0099  | 1 | 2 | 37       | 1 | VWTFPPQEELMDLQKDR + Oxidation (M)                       |
| b | <a href="#">129</a> | 742.3740  | 2224.1001 | 2224.0933 | 0.0069  | 1 | 1 | 42       | 1 | SSGQKISAEMSLYPSLEDLK + Acetyl (K)                       |
| b | <a href="#">143</a> | 574.2677  | 2293.0419 | 2293.0329 | 0.0090  | 1 | 1 | 29       | 1 | YKPVNCQVECHPYLNQMK + 2 Acetyl (K); Oxidation (M)        |
| b | <a href="#">113</a> | 729.0346  | 2184.0819 | 2184.0741 | 0.0078  | 1 | 1 | 44       | 1 | ACIESRVNMVTASYITPAMK                                    |
| b | <a href="#">146</a> | 767.3894  | 2299.1463 | 2299.1513 | -0.0051 | 0 | 0 | 50       | 1 | NMQMMSIEILTLFTELAK + Acetyl (K); 2 Oxidation (M)        |
| b | <a href="#">7</a>   | 412.7531  | 823.4917  | 823.4916  | 0.0001  | 0 | 0 | 38       | 1 | TVAPALPR                                                |
| b | <a href="#">141</a> | 762.3864  | 2284.1375 | 2284.1279 | 0.0096  | 1 | 0 | 46       | 1 | YGRHPLMELPLMINPTGCAR + Oxidation (M)                    |
| b | <a href="#">56</a>  | 668.8388  | 1335.6631 | 1335.6670 | -0.0039 | 0 | 0 | 1.1e+002 | 1 | IENLEEYFGLR                                             |
| b | <a href="#">1</a>   | 362.2217  | 722.4287  |           |         |   |   |          |   |                                                         |
| b | <a href="#">2</a>   | 384.2344  | 766.4542  |           |         |   |   |          |   |                                                         |
| b | <a href="#">5</a>   | 406.2475  | 810.4804  |           |         |   |   |          |   |                                                         |
| b | <a href="#">14</a>  | 428.2606  | 854.5067  |           |         |   |   |          |   |                                                         |
| b | <a href="#">20</a>  | 450.2733  | 898.5321  |           |         |   |   |          |   |                                                         |
| b | <a href="#">55</a>  | 664.8316  | 1327.6487 |           |         |   |   |          |   |                                                         |
| b | <a href="#">58</a>  | 448.2180  | 1341.6323 |           |         |   |   |          |   |                                                         |
| b | <a href="#">61</a>  | 459.5363  | 1375.5870 |           |         |   |   |          |   |                                                         |
| b | <a href="#">71</a>  | 488.2188  | 1461.6346 |           |         |   |   |          |   |                                                         |
| b | <a href="#">72</a>  | 492.2074  | 1473.6005 |           |         |   |   |          |   |                                                         |
| b | <a href="#">81</a>  | 525.2239  | 1572.6499 |           |         |   |   |          |   |                                                         |
| b | <a href="#">93</a>  | 559.9062  | 1676.6966 |           |         |   |   |          |   |                                                         |
| b | <a href="#">101</a> | 878.3738  | 1754.7330 |           |         |   |   |          |   |                                                         |
| b | <a href="#">104</a> | 890.8900  | 1779.7654 |           |         |   |   |          |   |                                                         |
| b | <a href="#">105</a> | 594.2753  | 1779.8041 |           |         |   |   |          |   |                                                         |
| b | <a href="#">107</a> | 904.9407  | 1807.8668 |           |         |   |   |          |   |                                                         |
| b | <a href="#">110</a> | 665.6211  | 1993.8414 |           |         |   |   |          |   |                                                         |
| b | <a href="#">112</a> | 1042.0058 | 2081.9970 |           |         |   |   |          |   |                                                         |
| b | <a href="#">115</a> | 737.3604  | 2209.0593 |           |         |   |   |          |   |                                                         |
| b | <a href="#">116</a> | 737.3670  | 2209.0793 |           |         |   |   |          |   |                                                         |
| b | <a href="#">128</a> | 742.0317  | 2223.0734 |           |         |   |   |          |   |                                                         |
| b | <a href="#">130</a> | 742.3742  | 2224.1007 |           |         |   |   |          |   |                                                         |
| b | <a href="#">131</a> | 742.3753  | 2224.1040 |           |         |   |   |          |   |                                                         |
| b | <a href="#">133</a> | 746.3762  | 2236.1068 |           |         |   |   |          |   |                                                         |
| b | <a href="#">134</a> | 747.0466  | 2238.1179 |           |         |   |   |          |   |                                                         |
| b | <a href="#">135</a> | 563.0173  | 2248.0400 |           |         |   |   |          |   |                                                         |
| b | <a href="#">136</a> | 567.0099  | 2264.0103 |           |         |   |   |          |   |                                                         |
| b | <a href="#">137</a> | 567.5066  | 2265.9974 |           |         |   |   |          |   |                                                         |
| b | <a href="#">138</a> | 758.3397  | 2271.9973 |           |         |   |   |          |   |                                                         |
| b | <a href="#">140</a> | 762.3857  | 2284.1353 |           |         |   |   |          |   |                                                         |
| b | <a href="#">144</a> | 766.7296  | 2297.1669 |           |         |   |   |          |   |                                                         |
| b | <a href="#">145</a> | 767.3891  | 2299.1454 |           |         |   |   |          |   |                                                         |
| b | <a href="#">147</a> | 767.7166  | 2300.1279 |           |         |   |   |          |   |                                                         |
| b | <a href="#">148</a> | 767.7168  | 2300.1287 |           |         |   |   |          |   |                                                         |
| b | <a href="#">150</a> | 772.0613  | 2313.1620 |           |         |   |   |          |   |                                                         |

## Search Parameters

Type of search : MS/MS Ion Search  
 Enzyme : Trypsin/P  
 Variable modifications : Acetyl (K),Acetyl (Protein N-term),Oxidation (M)  
 Mass values : Monoisotopic  
 Protein Mass : Unrestricted  
 Peptide Mass Tolerance : ± 0.02 Da  
 Fragment Mass Tolerance : ± 0.3 Da  
 Max Missed Cleavages : 1  
 Instrument type : ESI-TRAP  
 Number of queries : 151

Mascot: <http://www.matrixscience.com/>

**Mascot Search Results**

User : Bob  
 Email : rdenglis@utmb.edu  
 Search title : 11081913.raw #2271 phospho  
 MS data file : tempfile  
 Database : NCBI nr 20110707 (14481393 sequences; 4958963357 residues)  
 Taxonomy : Mus musculus (house mouse) (143921 sequences)  
 Timestamp : 24 Aug 2011 at 15:44:25 GMT  
 Protein hits : [gi|124248512](#) carbamoyl-phosphate synthase [ammonia], mitochondrial precursor [Mus musculus]  
[gi|14917005](#) RecName: Full=Stress-70 protein, mitochondrial; AltName: Full=75 kDa glucose-regulated protein; Short=GRP-75;  
[gi|51092303](#) Try10-like trypsinogen [Mus musculus]  
[gi|12843914](#) unnamed protein product [Mus musculus]  
[gi|3093758](#) cyclic AMP specific phosphodiesterase PDE4D5A [Mus musculus]

NCBI nr [Decoy](#) False discovery rate

Peptide matches above identity threshold 33 3 9.09 %  
 Peptide matches above homology or identity threshold 36 4 11.11 %

**Probability Based Mowse Score**

Ions score is  $-10 \cdot \log(P)$ , where P is the probability that the observed match is a random event. Individual ions scores > 32 indicate identity or extensive homology (p<0.05). Protein scores are derived from ions scores as a non-probabilistic basis for ranking protein hits.

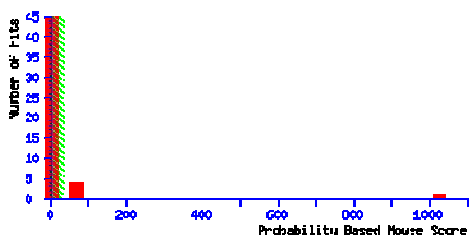

**Peptide Summary Report**

Format As  [Help](#)  
 Significance threshold p<  Max. number of hits   
 Standard scoring  MudPIT scoring  Ions score or expect cut-off  Show sub-sets   
 Show pop-ups  Suppress pop-ups  Sort unassigned   Require bold red

1. [gi|124248512](#) Mass: 164514 Score: 1027 Queries matched: 34 emPAI: 0.63  
 carbamoyl-phosphate synthase [ammonia], mitochondrial precursor [Mus musculus]  
 Check to include this hit in error tolerant search or archive report

| Query                | Observed | Mr (expt) | Mr (calc) | Delta   | Miss | Score | Expect   | Rank | Peptide                           |
|----------------------|----------|-----------|-----------|---------|------|-------|----------|------|-----------------------------------|
| b <a href="#">3</a>  | 406.2201 | 810.4257  | 810.4276  | -0.0019 | 0    | 30    | 0.1      | 1    | R.SFPFVSK.T                       |
| b <a href="#">4</a>  | 406.2204 | 810.4263  | 810.4276  | -0.0013 | 0    | (12)  | 6.3      | 1    | R.SFPFVSK.T                       |
| b <a href="#">21</a> | 453.2571 | 904.4996  | 904.5018  | -0.0022 | 0    | (38)  | 0.015    | 1    | K.LFAEAVQK.S                      |
| b <a href="#">22</a> | 453.2573 | 904.4999  | 904.5018  | -0.0019 | 0    | 51    | 0.00067  | 1    | K.LFAEAVQK.S                      |
| b <a href="#">24</a> | 495.2783 | 988.5421  | 988.5441  | -0.0020 | 0    | 58    | 0.00061  | 1    | K.ETLIDLGTK.A                     |
| b <a href="#">26</a> | 508.2394 | 1014.4642 | 1014.4658 | -0.0016 | 0    | 30    | 0.12     | 1    | R.TFEESFQK.A                      |
| b <a href="#">27</a> | 508.8016 | 1015.5887 | 1015.5914 | -0.0027 | 0    | 41    | 0.0045   | 1    | K.GTTITSVLPK.P                    |
| b <a href="#">30</a> | 518.7695 | 1035.5245 | 1035.5237 | 0.0009  | 0    | 43    | 0.0059   | 1    | K.EIEYEVVR.D                      |
| b <a href="#">32</a> | 545.7971 | 1089.5796 | 1089.5819 | -0.0023 | 0    | 46    | 0.0024   | 1    | K.VPAIYVDTR.M                     |
| b <a href="#">33</a> | 551.8077 | 1101.6009 | 1101.6030 | -0.0021 | 0    | 65    | 2.8e-005 | 1    | K.QNLAEVSTK.D                     |
| b <a href="#">34</a> | 568.7777 | 1135.5408 | 1135.5431 | -0.0023 | 0    | 63    | 5.6e-005 | 1    | K.VMIGESIDEK.R + Oxidation (M)    |
| b <a href="#">36</a> | 582.3725 | 1162.7305 | 1162.7325 | -0.0020 | 0    | 52    | 2.6e-005 | 1    | K.IALGIPLPEIK.N                   |
| b <a href="#">41</a> | 609.3103 | 1216.6059 | 1216.6088 | -0.0028 | 0    | 60    | 0.00012  | 1    | K.SLQWLQEEK.V                     |
| b <a href="#">43</a> | 611.3385 | 1220.6624 | 1220.6652 | -0.0029 | 0    | 64    | 2.6e-005 | 1    | R.SIFSAVLDELK.V                   |
| b <a href="#">44</a> | 611.8440 | 1221.6735 | 1221.6757 | -0.0022 | 0    | 51    | 0.00044  | 1    | K.ATGYPLAFLAAK.I                  |
| b <a href="#">46</a> | 623.8258 | 1245.6370 | 1245.6387 | -0.0017 | 0    | 56    | 0.00024  | 1    | K.IMGTSPLQIDR.A + Oxidation (M)   |
| b <a href="#">49</a> | 639.8492 | 1277.6838 | 1277.6867 | -0.0029 | 0    | 72    | 4.7e-006 | 1    | K.TLGVDFIDVATK.V                  |
| b <a href="#">50</a> | 649.8332 | 1297.6517 | 1297.6554 | -0.0036 | 0    | 57    | 0.0002   | 1    | K.LYFEELSLSR.I                    |
| b <a href="#">54</a> | 661.8407 | 1321.6668 | 1321.6700 | -0.0032 | 0    | 60    | 9.8e-005 | 1    | K.AADTIGYFVPMIR.S + Oxidation (M) |
| b <a href="#">60</a> | 677.3660 | 1352.7174 | 1352.7160 | 0.0014  | 0    | 68    | 1.1e-005 | 1    | R.GQNQPVLNITNR.Q                  |
| b <a href="#">65</a> | 704.8631 | 1407.7116 | 1407.7180 | -0.0064 | 0    | (51)  | 0.00082  | 1    | K.AFAMTNQILVER.S + Oxidation (M)  |
| b <a href="#">66</a> | 704.8696 | 1407.7246 | 1407.7180 | 0.0066  | 0    | 73    | 4.7e-006 | 1    | K.AFAMTNQILVER.S + Oxidation (M)  |
| b <a href="#">68</a> | 710.8476 | 1419.6806 | 1419.6841 | -0.0035 | 0    | 84    | 4.4e-007 | 1    | K.GLNSDSVTEETLR.K                 |
| b <a href="#">74</a> | 760.3725 | 1518.7304 | 1518.7348 | -0.0044 | 0    | 72    | 6.2e-006 | 1    | K.ALENNMSLDEIVR.L + Oxidation (M) |
| b <a href="#">82</a> | 526.6109 | 1576.8108 | 1576.8096 | 0.0012  | 1    | 19    | 0.99     | 1    | R.QLFSDKLNINEIK.I                 |

|   |                     |          |           |           |         |   |      |          |   |                                                      |
|---|---------------------|----------|-----------|-----------|---------|---|------|----------|---|------------------------------------------------------|
| b | <a href="#">84</a>  | 530.2740 | 1587.8003 | 1587.8045 | -0.0042 | 0 | 16   | 2.8      | 1 | R.FLGVAEQLHNEGFK.L                                   |
| b | <a href="#">86</a>  | 812.3974 | 1622.7803 | 1622.7861 | -0.0058 | 0 | 86   | 2.6e-007 | 1 | K.IAPSF <del>AVESIM</del> EDALK.A + Oxidation (M)    |
| b | <a href="#">87</a>  | 812.4010 | 1622.7875 | 1622.7822 | 0.0054  | 0 | 120  | 1e-010   | 1 | K.VLGT <del>SVESIM</del> ATEDR.Q + Oxidation (M)     |
| b | <a href="#">88</a>  | 812.4048 | 1622.7949 | 1622.7861 | 0.0088  | 0 | (71) | 7.2e-006 | 1 | K.IAPSF <del>AVESIM</del> EDALK.A + Oxidation (M)    |
| b | <a href="#">96</a>  | 862.4102 | 1722.8059 | 1722.8101 | -0.0042 | 0 | 80   | 9.7e-007 | 1 | K.IEFEGQSVDFVDPNK.Q                                  |
| b | <a href="#">97</a>  | 863.9507 | 1725.8868 | 1725.8897 | -0.0029 | 0 | 79   | 7.3e-007 | 1 | R.DGSIDLVINL <del>PNNNTK</del> .F                    |
| b | <a href="#">98</a>  | 576.6102 | 1726.8089 | 1726.8083 | 0.0006  | 1 | 17   | 2.2      | 1 | R.DLGLN <del>KYMESD</del> GK.V + Oxidation (M)       |
| b | <a href="#">111</a> | 682.0283 | 2043.0632 | 2043.0670 | -0.0039 | 0 | 56   | 9.7e-005 | 1 | K.TVL <del>MNPNIASVQ</del> TNEVGLK.Q + Oxidation (M) |
| b | <a href="#">151</a> | 936.4723 | 2806.3952 | 2806.4025 | -0.0073 | 1 | 59   | 4e-005   | 1 | K.IEFEGQSVDFVDPNK <del>QLIAEV</del> STK.D            |

2. [gi|14917005](#) Mass: 73483 Score: 99 Queries matched: 1 emPAI: 0.04  
 RecName: Full=Stress-70 protein, mitochondrial; AltName: Full=75 kDa glucose-regulated protein; Short=GRP-75; AltName: Full=Heat shock  
 e Check to include this hit in error tolerant search or archive report

| Query | Observed            | Mr(expt) | Mr(calc)  | Delta     | Miss    | Score | Expect | Rank     | Peptide |                                   |
|-------|---------------------|----------|-----------|-----------|---------|-------|--------|----------|---------|-----------------------------------|
| b     | <a href="#">108</a> | 904.9530 | 1807.8915 | 1807.8952 | -0.0037 | 0     | 99     | 8.6e-009 | 1       | K.SQV <del>FSTAADG</del> TQVEIK.V |

Proteins matching the same set of peptides:  
[gi|74204605](#) Mass: 73446 Score: 99 Queries matched: 1  
 unnamed protein product [Mus musculus]  
[gi|74205924](#) Mass: 63924 Score: 99 Queries matched: 1  
 unnamed protein product [Mus musculus]  
[gi|74225724](#) Mass: 73431 Score: 99 Queries matched: 1  
 unnamed protein product [Mus musculus]  
[gi|162461907](#) Mass: 73416 Score: 99 Queries matched: 1  
 stress-70 protein, mitochondrial [Mus musculus]

3. [gi|51092303](#) Mass: 26514 Score: 97 Queries matched: 2 emPAI: 0.25  
 Try10-like trypsinogen [Mus musculus]  
 e Check to include this hit in error tolerant search or archive report

| Query | Observed           | Mr(expt) | Mr(calc)  | Delta     | Miss    | Score | Expect | Rank     | Peptide |                                             |
|-------|--------------------|----------|-----------|-----------|---------|-------|--------|----------|---------|---------------------------------------------|
| b     | <a href="#">37</a> | 588.3176 | 1174.6207 | 1174.6267 | -0.0061 | 0     | (62)   | 5.8e-005 | 1       | K.TLDNDI <del>MLIK</del> .L                 |
| b     | <a href="#">39</a> | 596.3170 | 1190.6195 | 1190.6217 | -0.0021 | 0     | 63     | 4.8e-005 | 1       | K.TLDNDI <del>MLIK</del> .L + Oxidation (M) |

Proteins matching the same set of peptides:  
[gi|84781771](#) Mass: 26204 Score: 97 Queries matched: 2  
 trypsin 10 [Mus musculus]

4. [gi|12843914](#) Mass: 29993 Score: 79 Queries matched: 1 emPAI: 0.11  
 unnamed protein product [Mus musculus]  
 e Check to include this hit in error tolerant search or archive report

| Query | Observed           | Mr(expt) | Mr(calc)  | Delta     | Miss    | Score | Expect | Rank     | Peptide |                              |
|-------|--------------------|----------|-----------|-----------|---------|-------|--------|----------|---------|------------------------------|
| b     | <a href="#">51</a> | 651.8597 | 1301.7048 | 1301.7078 | -0.0031 | 0     | 79     | 8.4e-007 | 1       | R.SLDL <del>DSIAEVK</del> .A |

Proteins matching the same set of peptides:  
[gi|13272554](#) Mass: 42357 Score: 79 Queries matched: 1  
 cytokeratin KRT2-6HF [Mus musculus]  
[gi|16303309](#) Mass: 61743 Score: 79 Queries matched: 1  
 type II keratin 5 [Mus musculus]  
[gi|20911031](#) Mass: 61729 Score: 79 Queries matched: 1  
 keratin, type II cytoskeletal 5 [Mus musculus]  
[gi|29789317](#) Mass: 59704 Score: 79 Queries matched: 1  
 keratin, type II cytoskeletal 75 [Mus musculus]  
[gi|54607171](#) Mass: 59299 Score: 79 Queries matched: 1  
 keratin, type II cytoskeletal 6A [Mus musculus]  
[gi|59798479](#) Mass: 60285 Score: 79 Queries matched: 1  
 RecName: Full=Keratin, type II cytoskeletal 6B; AltName: Full=Cytokeratin-6B; Short=CK-6B; AltName: Full=Keratin-6-beta; Short=mK6-bet  
[gi|110645788](#) Mass: 60236 Score: 79 Queries matched: 1  
 Krt6b protein [Mus musculus]  
[gi|113195684](#) Mass: 59490 Score: 79 Queries matched: 1  
 keratin, type II cytoskeletal 6B [Mus musculus]  
[gi|116063325](#) Mass: 60154 Score: 79 Queries matched: 1  
 Krt6b protein [Mus musculus]  
[gi|148672084](#) Mass: 34775 Score: 79 Queries matched: 1  
 mCG17577 [Mus musculus]  
[gi|148672085](#) Mass: 38119 Score: 79 Queries matched: 1  
 mCG144996 [Mus musculus]  
[gi|148672089](#) Mass: 62241 Score: 79 Queries matched: 1  
 keratin 75 [Mus musculus]

5. [gi|3093758](#) Mass: 23890 Score: 36 Queries matched: 1 emPAI: 0.13  
 cyclic AMP specific phosphodiesterase PDE4D5A [Mus musculus]  
 e Check to include this hit in error tolerant search or archive report

| Query | Observed           | Mr(expt) | Mr(calc) | Delta    | Miss    | Score | Expect | Rank   | Peptide |                           |
|-------|--------------------|----------|----------|----------|---------|-------|--------|--------|---------|---------------------------|
| b     | <a href="#">17</a> | 434.7656 | 867.5166 | 867.5178 | -0.0011 | 0     | 36     | 0.0069 | 1       | K.LSPVIS <del>PR</del> .N |

Proteins matching the same set of peptides:

gi|148686495 Mass: 79441 Score: 36 Queries matched: 1  
 phosphodiesterase 4D, cAMP specific, isoform CRA\_c [Mus musculus]

Peptide matches not assigned to protein hits: (no details means no match)

| Query                 | Observed | Mr(expt)  | Mr(calc)  | Delta   | Miss | Score | Expect | Rank | Peptide                                      |
|-----------------------|----------|-----------|-----------|---------|------|-------|--------|------|----------------------------------------------|
| b <a href="#">11</a>  | 421.7575 | 841.5005  | 841.4810  | 0.0195  | 0    | 30    | 0.06   | 1    | LGTWLPR                                      |
| b <a href="#">9</a>   | 421.7574 | 841.5003  | 841.4810  | 0.0193  | 0    | 28    | 0.1    | 1    | LGTWLPR                                      |
| b <a href="#">8</a>   | 421.7567 | 841.4988  | 841.4810  | 0.0177  | 0    | 25    | 0.19   | 1    | LGTWLPR                                      |
| b <a href="#">10</a>  | 421.7575 | 841.5004  | 841.4810  | 0.0194  | 0    | 25    | 0.21   | 1    | LGTWLPR                                      |
| b <a href="#">42</a>  | 611.3076 | 1220.6007 | 1220.6037 | -0.0030 | 0    | 23    | 0.56   | 1    | FEGAQSVVQEK                                  |
| b <a href="#">62</a>  | 688.8440 | 1375.6734 | 1375.6700 | 0.0034  | 1    | 21    | 0.85   | 1    | RMMEVAADVQR                                  |
| b <a href="#">118</a> | 737.7040 | 2210.0902 | 2210.0967 | -0.0065 | 0    | 21    | 0.5    | 1    | LGEHNINVLGNEQFIDAAK                          |
| b <a href="#">119</a> | 737.7041 | 2210.0904 | 2210.0967 | -0.0063 | 0    | 20    | 0.59   | 1    | LGEHNINVLGNEQFIDAAK                          |
| b <a href="#">63</a>  | 696.8414 | 1391.6683 | 1391.6810 | -0.0127 | 0    | 20    | 1.2    | 1    | QGSLLIQVPSVER + Phospho (ST)                 |
| b <a href="#">90</a>  | 820.3950 | 1638.7755 | 1638.7745 | 0.0009  | 1    | 20    | 0.94   | 1    | IQMEEFMAANPSK + Oxidation (M)                |
| b <a href="#">79</a>  | 780.8968 | 1559.7790 | 1559.7654 | 0.0137  | 0    | 19    | 1.1    | 1    | QWGLLCDLLEQDK                                |
| b <a href="#">124</a> | 737.7048 | 2210.0925 | 2210.0967 | -0.0042 | 0    | 19    | 0.81   | 1    | LGEHNINVLGNEQFIDAAK                          |
| b <a href="#">47</a>  | 625.3053 | 1248.5960 | 1248.5825 | 0.0135  | 1    | 18    | 1.8    | 1    | MSLSLKFKEK + Phospho (ST)                    |
| b <a href="#">85</a>  | 804.8985 | 1607.7824 | 1607.7825 | -0.0001 | 1    | 18    | 1.6    | 1    | QKQDQTQTISLTK                                |
| b <a href="#">92</a>  | 837.3882 | 1672.7618 | 1672.7693 | -0.0075 | 0    | 18    | 1.8    | 1    | DSEGDTPSLINWPSR                              |
| b <a href="#">122</a> | 737.7043 | 2210.0912 | 2210.0967 | -0.0055 | 0    | 18    | 1      | 1    | LGEHNINVLGNEQFIDAAK                          |
| b <a href="#">35</a>  | 570.2702 | 1138.5259 | 1138.5189 | 0.0069  | 1    | 18    | 2.4    | 1    | GMAEAERGFR + Oxidation (M)                   |
| b <a href="#">31</a>  | 536.3229 | 1070.6311 | 1070.6196 | 0.0115  | 1    | 18    | 0.78   | 1    | DLQLRVTAR                                    |
| b <a href="#">15</a>  | 428.7647 | 855.5148  | 855.5178  | -0.0029 | 0    | 17    | 1.1    | 1    | EAALIALR                                     |
| b <a href="#">57</a>  | 669.8388 | 1337.6631 | 1337.6452 | 0.0179  | 1    | 16    | 2.7    | 1    | RASQSIGGIPSR + Phospho (ST)                  |
| b <a href="#">117</a> | 737.7030 | 2210.0872 | 2210.0967 | -0.0095 | 0    | 16    | 1.6    | 1    | LGEHNINVLGNEQFIDAAK                          |
| b <a href="#">45</a>  | 617.3082 | 1232.6018 | 1232.6183 | -0.0165 | 0    | 15    | 3.3    | 1    | LSGGAVPSASMTK                                |
| b <a href="#">16</a>  | 428.7670 | 855.5193  | 855.5112  | 0.0081  | 1    | 15    | 1.5    | 1    | ALRMLPR                                      |
| b <a href="#">38</a>  | 595.3264 | 1188.6383 | 1188.6462 | -0.0080 | 1    | 15    | 2.2    | 1    | ITDITSDRLR                                   |
| b <a href="#">12</a>  | 421.7579 | 841.5013  | 841.5134  | -0.0121 | 1    | 15    | 2      | 1    | LGLRLDR                                      |
| b <a href="#">70</a>  | 712.8628 | 1423.7110 | 1423.7072 | 0.0039  | 1    | 14    | 3.1    | 1    | AENSSLNLIGKAK + Phospho (ST)                 |
| b <a href="#">28</a>  | 510.7709 | 1019.5273 | 1019.5182 | 0.0091  | 1    | 14    | 4.3    | 1    | MRDLGVASR + Oxidation (M)                    |
| b <a href="#">121</a> | 737.7043 | 2210.0912 | 2210.0967 | -0.0055 | 0    | 14    | 2.5    | 1    | LGEHNINVLGNEQFIDAAK                          |
| b <a href="#">100</a> | 864.4420 | 1726.8694 | 1726.8638 | 0.0055  | 1    | 14    | 3.1    | 1    | GLEWIGRIDPNDGGTK                             |
| b <a href="#">95</a>  | 857.4052 | 1712.7959 | 1712.8056 | -0.0096 | 1    | 14    | 4.3    | 1    | TSPLKILANADTMK + Oxidation (M); Phospho (ST) |
| b <a href="#">123</a> | 737.7047 | 2210.0924 | 2210.0967 | -0.0043 | 0    | 13    | 2.8    | 1    | LGEHNINVLGNEQFIDAAK                          |
| b <a href="#">67</a>  | 710.8361 | 1419.6577 | 1419.6759 | -0.0182 | 1    | 13    | 5.1    | 1    | QDGLQLRDLSPV + Phospho (ST)                  |
| b <a href="#">13</a>  | 421.7586 | 841.5025  | 841.5021  | 0.0004  | 0    | 13    | 3      | 1    | LSVALSPR                                     |
| b <a href="#">125</a> | 737.7051 | 2210.0934 | 2210.0967 | -0.0033 | 0    | 13    | 2.9    | 1    | LGEHNINVLGNEQFIDAAK                          |
| b <a href="#">40</a>  | 597.7979 | 1193.5813 | 1193.5863 | -0.0050 | 0    | 13    | 6.6    | 1    | MDASLGNLFAR                                  |
| b <a href="#">53</a>  | 655.8552 | 1309.6958 | 1309.6812 | 0.0145  | 1    | 13    | 3.3    | 1    | VGM DYRTSILR                                 |
| b <a href="#">48</a>  | 631.8247 | 1261.6349 | 1261.6277 | 0.0072  | 1    | 13    | 5.7    | 1    | LYGSFNFRMK                                   |
| b <a href="#">106</a> | 897.9082 | 1793.8019 | 1793.8059 | -0.0041 | 1    | 12    | 5.6    | 1    | EFLGTTQTASFCGPKK + Phospho (ST)              |
| b <a href="#">80</a>  | 783.8719 | 1565.7292 | 1565.7169 | 0.0123  | 1    | 12    | 7.1    | 1    | VSETSGGKTSGEDANK                             |
| b <a href="#">73</a>  | 752.8660 | 1503.7174 | 1503.7275 | -0.0101 | 1    | 12    | 6.6    | 1    | FFKEIWSAAR + Phospho (ST)                    |
| b <a href="#">64</a>  | 701.3595 | 1400.7044 | 1400.7139 | -0.0095 | 0    | 11    | 7.1    | 1    | MVFITVIEILR + Phospho (ST)                   |
| b <a href="#">18</a>  | 435.7731 | 869.5316  | 869.5123  | 0.0193  | 0    | 11    | 3.3    | 1    | VSLWLPR                                      |
| b <a href="#">101</a> | 878.3738 | 1754.7330 | 1754.7334 | -0.0004 | 1    | 11    | 7.5    | 1    | SVTPPKVSLFEPK + 3 Phospho (ST)               |
| b <a href="#">59</a>  | 673.8514 | 1345.6883 | 1345.6723 | 0.0160  | 0    | 11    | 6.5    | 1    | FEELYPFLK + Phospho (Y)                      |
| b <a href="#">136</a> | 567.0099 | 2264.0103 | 2264.0087 | 0.0016  | 1    | 11    | 7.5    | 1    | ARALLASTAISTAVDNSGSGDK + 2 Phospho (ST)      |
| b <a href="#">99</a>  | 864.4410 | 1726.8674 | 1726.8638 | 0.0035  | 1    | 11    | 6.8    | 1    | GLEWIGRIDPNDGGTK                             |
| b <a href="#">52</a>  | 655.3216 | 1308.6286 | 1308.6098 | 0.0187  | 0    | 10    | 11     | 1    | GNFIPYANEER                                  |
| b <a href="#">120</a> | 737.7041 | 2210.0906 | 2210.0967 | -0.0061 | 0    | 9     | 8.2    | 1    | LGEHNINVLGNEQFIDAAK                          |
| b <a href="#">81</a>  | 525.2239 | 1572.6499 | 1572.6529 | -0.0030 | 1    | 9     | 11     | 1    | SSENSSEGNALRR + Phospho (ST)                 |
| b <a href="#">126</a> | 738.0335 | 2211.0785 | 2211.0920 | -0.0135 | 0    | 9     | 8.7    | 1    | LGEHNINVLGNEQFVNSAK                          |
| b <a href="#">78</a>  | 774.8640 | 1547.7135 | 1547.7137 | -0.0002 | 0    | 8     | 16     | 1    | QLEDAIEDCTNAVK                               |
| b <a href="#">91</a>  | 830.9283 | 1659.8421 | 1659.8250 | 0.0171  | 1    | 8     | 11     | 1    | TSVHQETKSMLLDR + Oxidation (M)               |
| b <a href="#">89</a>  | 820.3943 | 1638.7740 | 1638.7800 | -0.0061 | 1    | 8     | 14     | 1    | GQLASKSTILCSHK + Phospho (ST)                |
| b <a href="#">25</a>  | 505.2683 | 1008.5220 | 1008.5136 | 0.0083  | 0    | 7     | 21     | 1    | MVSGFIFMK                                    |
| b <a href="#">76</a>  | 768.3708 | 1534.7269 | 1534.7207 | 0.0063  | 1    | 7     | 20     | 1    | ACRPSWLCLCEVR                                |
| b <a href="#">103</a> | 887.9500 | 1773.8854 | 1773.8662 | 0.0192  | 1    | 7     | 16     | 1    | LIDTSHLSSEVTKK + Phospho (ST)                |
| b <a href="#">29</a>  | 512.2384 | 1022.4623 | 1022.4798 | -0.0174 | 0    | 7     | 19     | 1    | TAPLSTTPR + Phospho (ST)                     |
| b <a href="#">132</a> | 742.7034 | 2225.0885 | 2225.0970 | -0.0085 | 1    | 7     | 12     | 1    | SVIQRQSGALGPIISVTPSGR + 2 Phospho (ST)       |
| b <a href="#">23</a>  | 459.2761 | 916.5377  | 916.5229  | 0.0148  | 0    | 7     | 12     | 1    | LNTSELIK                                     |
| b <a href="#">69</a>  | 711.3399 | 1420.6653 | 1420.6516 | 0.0136  | 1    | 7     | 22     | 1    | GLSNRNLIIY + Phospho (ST); Phospho (Y)       |
| b <a href="#">83</a>  | 790.8885 | 1579.7625 | 1579.7503 | 0.0122  | 1    | 6     | 29     | 1    | TKYLQILTSMR + Oxidation (M); Phospho (ST)    |
| b <a href="#">114</a> | 732.0281 | 2193.0626 | 2193.0541 | 0.0085  | 1    | 5     | 21     | 1    | TEVHKVVNSFLCLVPDDAK + Phospho (ST)           |
| b <a href="#">113</a> | 729.0346 | 2184.0819 | 2184.0690 | 0.0129  | 0    | 5     | 18     | 1    | MTGLESLSWSEVLQLPFR + Phospho (ST)            |
| b <a href="#">75</a>  | 760.8651 | 1519.7157 | 1519.7163 | -0.0005 | 1    | 5     | 36     | 1    | LKSVDTAMYCAR                                 |
| b <a href="#">110</a> | 665.6211 | 1993.8414 | 1993.8564 | -0.0150 | 0    | 5     | 30     | 1    | GDIVLTQSPATLSVTPR + 3 Phospho (ST)           |
| b <a href="#">19</a>  | 435.7740 | 869.5335  | 869.5487  | -0.0152 | 0    | 4     | 16     | 1    | LWVALLR                                      |
| b <a href="#">105</a> | 594.2753 | 1779.8041 | 1779.7957 | 0.0084  | 1    | 4     | 40     | 1    | TSFQDELIRAITAR + 2 Phospho (ST)              |
| b <a href="#">139</a> | 762.0572 | 2283.1499 | 2283.1442 | 0.0057  | 1    | 4     | 21     | 1    | QTSKSKQVNIIVSTLLSTSDS                        |



|   |                     |           |           |           |         |   |   |        |   |                                                                                       |
|---|---------------------|-----------|-----------|-----------|---------|---|---|--------|---|---------------------------------------------------------------------------------------|
| b | <a href="#">93</a>  | 559.9062  | 1676.6966 | 1676.6882 | 0.0085  | 0 | 3 | 43     | 1 | QGLSTMP <del>E</del> IEA <del>S</del> V <del>R</del> + 2 Phospho (ST)                 |
| b | <a href="#">109</a> | 970.9696  | 1939.9246 | 1939.9054 | 0.0192  | 1 | 3 | 38     | 1 | IQGLTGNVQFDHYGRR + Phospho (ST)                                                       |
| b | <a href="#">149</a> | 767.7172  | 2300.1298 | 2300.1156 | 0.0143  | 1 | 3 | 26     | 1 | ECYPKAMHCIFVGAQSLFLK + Oxidation (M)                                                  |
| b | <a href="#">129</a> | 742.3740  | 2224.1001 | 2224.0889 | 0.0112  | 1 | 3 | 30     | 1 | LQGVLEGLTNSKTYDTLHR + Phospho (ST)                                                    |
| b | <a href="#">128</a> | 742.0317  | 2223.0734 | 2223.0784 | -0.0050 | 1 | 3 | 37     | 1 | SLDTLQNVSVQLEGLERDK + Phospho (ST)                                                    |
| b | <a href="#">102</a> | 882.8930  | 1763.7713 | 1763.7892 | -0.0179 | 1 | 3 | 56     | 1 | NMSYMEKGTMTGAALK + 2 Oxidation (M)                                                    |
| b | <a href="#">133</a> | 746.3762  | 2236.1068 | 2236.0979 | 0.0088  | 0 | 3 | 39     | 1 | LVGLLMLAVVNSITLDIR + Oxidation (M); 2 Phospho (ST)                                    |
| b | <a href="#">94</a>  | 559.9082  | 1676.7028 | 1676.6938 | 0.0090  | 0 | 3 | 54     | 1 | IAMALSDLV <del>I</del> Y <del>T</del> K + 2 Phospho (ST); Phospho (Y)                 |
| b | <a href="#">104</a> | 890.8900  | 1779.7654 | 1779.7515 | 0.0139  | 1 | 2 | 59     | 1 | RIPSV <del>E</del> EMS <del>Q</del> T <del>S</del> LK + Oxidation (M); 2 Phospho (ST) |
| b | <a href="#">6</a>   | 412.7524  | 823.4903  | 823.4916  | -0.0013 | 0 | 2 | 17     | 1 | AVLSHGLK                                                                              |
| b | <a href="#">142</a> | 762.7132  | 2285.1177 | 2285.1362 | -0.0185 | 0 | 2 | 34     | 1 | SATLMVVEDVVQIVSGFQGAR + Oxidation (M)                                                 |
| b | <a href="#">134</a> | 747.0466  | 2238.1179 | 2238.1158 | 0.0021  | 0 | 2 | 30     | 1 | DTHSLPPAQILGIQSGQGIAR + Phospho (ST)                                                  |
| b | <a href="#">77</a>  | 769.3227  | 1536.6309 | 1536.6110 | 0.0199  | 0 | 2 | 72     | 1 | I <del>S</del> TGGGETGETLQK + 2 Phospho (ST)                                          |
| b | <a href="#">144</a> | 766.7296  | 2297.1669 | 2297.1533 | 0.0136  | 1 | 2 | 26     | 1 | LCMPGLT <del>V</del> LRLCMPGLT <del>V</del> LRL + 2 Oxidation (M); Phospho (ST)       |
| b | <a href="#">55</a>  | 664.8316  | 1327.6487 | 1327.6537 | -0.0050 | 1 | 1 | 68     | 1 | RTATY <del>L</del> PEVAK + Phospho (Y)                                                |
| b | <a href="#">72</a>  | 492.2074  | 1473.6005 | 1473.6171 | -0.0166 | 0 | 1 | 71     | 1 | SQEATEG <del>T</del> MATLR + Phospho (ST)                                             |
| b | <a href="#">143</a> | 574.2677  | 2293.0419 | 2293.0304 | 0.0115  | 0 | 0 | 71     | 1 | LEWVATISGGGNTYYFDSVK + Phospho (ST)                                                   |
| b | <a href="#">145</a> | 767.3891  | 2299.1454 | 2299.1501 | -0.0047 | 1 | 0 | 42     | 1 | AKFDGIFESLLFPVNGLLSGDK + Phospho (ST)                                                 |
| b | <a href="#">7</a>   | 412.7531  | 823.4917  | 823.4916  | 0.0001  | 0 | 0 | 24     | 1 | TVAPALPR                                                                              |
| b | <a href="#">112</a> | 1042.0058 | 2081.9970 | 2081.9857 | 0.0114  | 0 | 0 | 67     | 1 | DV <del>T</del> LHVSASN <del>P</del> AMLLYQK + Oxidation (M); Phospho (ST)            |
| b | <a href="#">141</a> | 762.3864  | 2284.1375 | 2284.1279 | 0.0096  | 1 | 0 | 41     | 1 | YGRHPLMELPLMINPTGCAR + Oxidation (M)                                                  |
| b | <a href="#">147</a> | 767.7166  | 2300.1279 | 2300.1354 | -0.0076 | 1 | 0 | 49     | 1 | QPSGKGL <del>E</del> WLLHILW <del>N</del> DSK + Phospho (ST)                          |
| b | <a href="#">56</a>  | 668.8388  | 1335.6631 | 1335.6670 | -0.0039 | 0 | 0 | 1e+002 | 1 | IENLEEYTG <del>L</del> R                                                              |
| b | <a href="#">127</a> | 738.0386  | 2211.0940 | 2211.1101 | -0.0162 | 1 | 0 | 63     | 1 | SAPEIKYNSMVLICALMGSGK                                                                 |
| b | <a href="#">1</a>   | 362.2217  | 722.4287  |           |         |   |   |        |   |                                                                                       |
| b | <a href="#">2</a>   | 384.2344  | 766.4542  |           |         |   |   |        |   |                                                                                       |
| b | <a href="#">5</a>   | 406.2475  | 810.4804  |           |         |   |   |        |   |                                                                                       |
| b | <a href="#">14</a>  | 428.2606  | 854.5067  |           |         |   |   |        |   |                                                                                       |
| b | <a href="#">20</a>  | 450.2733  | 898.5321  |           |         |   |   |        |   |                                                                                       |
| b | <a href="#">58</a>  | 448.2180  | 1341.6323 |           |         |   |   |        |   |                                                                                       |
| b | <a href="#">61</a>  | 459.5363  | 1375.5870 |           |         |   |   |        |   |                                                                                       |
| b | <a href="#">71</a>  | 488.2188  | 1461.6346 |           |         |   |   |        |   |                                                                                       |
| b | <a href="#">107</a> | 904.9407  | 1807.8668 |           |         |   |   |        |   |                                                                                       |
| b | <a href="#">115</a> | 737.3604  | 2209.0593 |           |         |   |   |        |   |                                                                                       |
| b | <a href="#">116</a> | 737.3670  | 2209.0793 |           |         |   |   |        |   |                                                                                       |
| b | <a href="#">130</a> | 742.3742  | 2224.1007 |           |         |   |   |        |   |                                                                                       |
| b | <a href="#">131</a> | 742.3753  | 2224.1040 |           |         |   |   |        |   |                                                                                       |
| b | <a href="#">135</a> | 563.0173  | 2248.0400 |           |         |   |   |        |   |                                                                                       |
| b | <a href="#">137</a> | 567.5066  | 2265.9974 |           |         |   |   |        |   |                                                                                       |
| b | <a href="#">138</a> | 758.3397  | 2271.9973 |           |         |   |   |        |   |                                                                                       |
| b | <a href="#">140</a> | 762.3857  | 2284.1353 |           |         |   |   |        |   |                                                                                       |
| b | <a href="#">146</a> | 767.3894  | 2299.1463 |           |         |   |   |        |   |                                                                                       |
| b | <a href="#">148</a> | 767.7168  | 2300.1287 |           |         |   |   |        |   |                                                                                       |
| b | <a href="#">150</a> | 772.0613  | 2313.1620 |           |         |   |   |        |   |                                                                                       |

## Search Parameters

Type of search : MS/MS Ion Search  
 Enzyme : Trypsin/P  
 Variable modifications : Oxidation (M),Phospho (ST),Phospho (Y)  
 Mass values : Monoisotopic  
 Protein Mass : Unrestricted  
 Peptide Mass Tolerance : ± 0.02 Da  
 Fragment Mass Tolerance : ± 0.3 Da  
 Max Missed Cleavages : 1  
 Instrument type : ESI-TRAP  
 Number of queries : 151

Mascot: <http://www.matrixscience.com/>



**MASCOT** Mascot Search Results

User : Bob  
 Email : rdenglis@utmb.edu  
 Search title : 11081915.raw #2289 acetylation  
 MS data file : tempfile  
 Database : NCBI nr 20110707 (14481393 sequences; 4958963357 residues)  
 Taxonomy : Mus musculus (house mouse) (143921 sequences)  
 Timestamp : 24 Aug 2011 at 16:25:11 GMT  
 Protein hits : [gi|124248512](#) carbamoyl-phosphate synthase [ammonia], mitochondrial precursor [Mus musculus]  
[gi|7638398](#) epidermal keratin 10 [Mus musculus]  
[gi|12843914](#) unnamed protein product [Mus musculus]  
[gi|9910294](#) keratin, type II cytoskeletal 71 [Mus musculus]  
[gi|51092303](#) Try10-like trypsinogen [Mus musculus]

NCBI nr [Decoy](#) False discovery rate

Peptide matches above identity threshold 32 1 3.13 %  
 Peptide matches above homology or identity threshold 38 1 2.63 %

Probability Based Mowse Score

Ions score is  $-10 \cdot \log(P)$ , where P is the probability that the observed match is a random event. Individual ions scores > 32 indicate identity or extensive homology (p<0.05). Protein scores are derived from ions scores as a non-probabilistic basis for ranking protein hits.

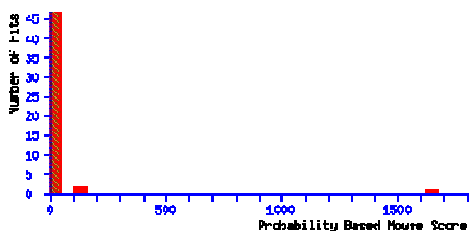

Peptide Summary Report

Format As   [Help](#)

Significance threshold p<  Max. number of hits

Standard scoring  MudPIT scoring  Ions score or expect cut-off  Show sub-sets

Show pop-ups  Suppress pop-ups  Sort unassigned   Require bold red

**Error tolerant**

1. [gi|124248512](#) Mass: 164514 Score: 1647 Queries matched: 32 emPAI: 0.69  
 carbamoyl-phosphate synthase [ammonia], mitochondrial precursor [Mus musculus]  
 Check to include this hit in error tolerant search or archive report

| Query                | Observed | Mr (expt) | Mr (calc) | Delta   | Miss | Score | Expect   | Rank | Peptide                            |
|----------------------|----------|-----------|-----------|---------|------|-------|----------|------|------------------------------------|
| b <a href="#">3</a>  | 406.2209 | 810.4273  | 810.4276  | -0.0003 | 0    | 18    | 2.1      | 1    | R.SFPFVSK.T                        |
| b <a href="#">4</a>  | 406.2210 | 810.4274  | 810.4276  | -0.0002 | 0    | (18)  | 2.5      | 1    | R.SFPFVSK.T                        |
| b <a href="#">20</a> | 453.2577 | 904.5008  | 904.5018  | -0.0010 | 0    | 51    | 0.00089  | 1    | K.LFAEAVQK.S                       |
| b <a href="#">22</a> | 495.2792 | 988.5438  | 988.5441  | -0.0003 | 0    | 64    | 0.00018  | 1    | K.ETLIDLGTK.A                      |
| b <a href="#">24</a> | 508.2386 | 1014.4626 | 1014.4658 | -0.0032 | 0    | 34    | 0.029    | 1    | R.TFEESFQK.A                       |
| b <a href="#">25</a> | 508.8025 | 1015.5904 | 1015.5914 | -0.0010 | 0    | 36    | 0.019    | 1    | K.GTTITSVLPK.P                     |
| b <a href="#">28</a> | 518.7687 | 1035.5228 | 1035.5237 | -0.0008 | 0    | 42    | 0.0094   | 1    | K.EIEYEVVR.D                       |
| b <a href="#">29</a> | 545.7978 | 1089.5810 | 1089.5819 | -0.0009 | 0    | 52    | 0.0011   | 1    | K.VPAIYGVDT.R.M                    |
| b <a href="#">30</a> | 551.8083 | 1101.6020 | 1101.6030 | -0.0009 | 0    | 63    | 7.7e-005 | 1    | K.QNLIAEVSTK.D                     |
| b <a href="#">33</a> | 568.7786 | 1135.5427 | 1135.5431 | -0.0004 | 0    | 68    | 2.3e-005 | 1    | K.VMIGESIDEK.R + Oxidation (M)     |
| b <a href="#">35</a> | 582.3728 | 1162.7311 | 1162.7325 | -0.0014 | 0    | 46    | 0.00012  | 1    | K.IALGIPLPEIK.N                    |
| b <a href="#">39</a> | 609.3110 | 1216.6075 | 1216.6088 | -0.0013 | 0    | 56    | 0.00034  | 1    | K.SLGLWQEEK.V                      |
| b <a href="#">40</a> | 611.3398 | 1220.6651 | 1220.6652 | -0.0001 | 0    | 64    | 3.5e-005 | 1    | R.SIFSVALDELK.V                    |
| b <a href="#">41</a> | 611.8448 | 1221.6750 | 1221.6757 | -0.0007 | 0    | 43    | 0.0039   | 1    | K.ATGYPLAFIAK.I                    |
| b <a href="#">43</a> | 623.8305 | 1245.6463 | 1245.6387 | 0.0076  | 0    | 55    | 0.00058  | 1    | K.IMGTSPLQIDR.A + Oxidation (M)    |
| b <a href="#">45</a> | 639.8505 | 1277.6864 | 1277.6867 | -0.0003 | 0    | 55    | 0.0003   | 1    | K.TLGVDFIDVATK.V                   |
| b <a href="#">46</a> | 649.8343 | 1297.6540 | 1297.6554 | -0.0013 | 0    | 57    | 0.00021  | 1    | K.LYFEELSLEK.I                     |
| b <a href="#">50</a> | 661.8425 | 1321.6705 | 1321.6700 | 0.0005  | 0    | 56    | 0.00031  | 1    | K.AADTIGYVPMIR.S + Oxidation (M)   |
| b <a href="#">52</a> | 677.3653 | 1352.7161 | 1352.7160 | 0.0001  | 0    | 68    | 1.7e-005 | 1    | R.GQNQPVLTNTR.Q                    |
| b <a href="#">57</a> | 704.8639 | 1407.7132 | 1407.7180 | -0.0049 | 0    | (50)  | 0.0011   | 1    | K.AFAMTNQILVER.S + Oxidation (M)   |
| b <a href="#">58</a> | 704.8662 | 1407.7178 | 1407.7180 | -0.0003 | 0    | 65    | 3.2e-005 | 1    | K.AFAMTNQILVER.S + Oxidation (M)   |
| b <a href="#">60</a> | 710.8537 | 1419.6928 | 1419.6841 | 0.0087  | 0    | 85    | 3.6e-007 | 1    | K.GLNDSVTEETLR.K                   |
| b <a href="#">65</a> | 760.3782 | 1518.7418 | 1518.7348 | 0.0071  | 0    | 72    | 7e-006   | 1    | K.ALENNMSLDEIVR.L + Oxidation (M)  |
| b <a href="#">71</a> | 526.6100 | 1576.8082 | 1576.8096 | -0.0014 | 1    | 30    | 0.094    | 1    | R.QLFSDKLINEK.I                    |
| b <a href="#">73</a> | 530.2751 | 1587.8035 | 1587.8045 | -0.0010 | 0    | 12    | 5.9      | 1    | R.FLGVAEQLHNEGFK.L                 |
| b <a href="#">76</a> | 812.3998 | 1622.7850 | 1622.7861 | -0.0012 | 0    | 74    | 3.5e-006 | 1    | K.IAPFAVESMEDALK.A + Oxidation (M) |



[gi|47059013](#) Mass: 58875 Score: 71 Queries matched: 1  
 keratin, type II cytoskeletal 73 [Mus musculus]  
[gi|51092293](#) Mass: 61322 Score: 71 Queries matched: 1  
 keratin, type II cytoskeletal 1b [Mus musculus]  
[gi|81891697](#) Mass: 54712 Score: 71 Queries matched: 1  
 RecName: Full=Keratin, type II cytoskeletal 74; AltName: Full=Keratin-74; Short=K74; AltName: Full=Type-II keratin Kb37  
[gi|115528975](#) Mass: 61265 Score: 71 Queries matched: 1  
 Keratin 77 [Mus musculus]  
[gi|126116585](#) Mass: 65565 Score: 71 Queries matched: 1  
 keratin, type II cytoskeletal 1 [Mus musculus]  
[gi|148672081](#) Mass: 43429 Score: 71 Queries matched: 1  
 mCG17589, isoform CRA\_b [Mus musculus]

5. [gi|51092303](#) Mass: 26514 Score: 66 Queries matched: 2 emPAI: 0.25

Try10-like trypsinogen [Mus musculus]

e Check to include this hit in error tolerant search or archive report

| Query                | Observed | Mr(expt)  | Mr(calc)  | Delta   | Miss | Score | Expect   | Rank | Peptide                                |
|----------------------|----------|-----------|-----------|---------|------|-------|----------|------|----------------------------------------|
| b <a href="#">36</a> | 588.3192 | 1174.6239 | 1174.6267 | -0.0028 | 0    | 66    | 3.3e-005 | 1    | K.TLNDI <b>MLIK</b> .L                 |
| b <a href="#">38</a> | 596.3189 | 1190.6233 | 1190.6217 | 0.0017  | 0    | (50)  | 0.0017   | 1    | K.TLNDI <b>MLIK</b> .L + Oxidation (M) |

Proteins matching the same set of peptides:

[gi|84781771](#) Mass: 26204 Score: 66 Queries matched: 2  
 trypsin 10 [Mus musculus]

Peptide matches not assigned to protein hits: (no details means no match)

| Query                 | Observed  | Mr(expt)  | Mr(calc)  | Delta   | Miss | Score | Expect | Rank | Peptide                                                                                                                |
|-----------------------|-----------|-----------|-----------|---------|------|-------|--------|------|------------------------------------------------------------------------------------------------------------------------|
| b <a href="#">8</a>   | 421.7573  | 841.5001  | 841.4810  | 0.0191  | 0    | 30    | 0.17   | 1    | LGTW <b>LPR</b>                                                                                                        |
| b <a href="#">13</a>  | 421.7582  | 841.5019  | 841.5022  | -0.0002 | 1    | 27    | 0.29   | 1    | V <b>KT</b> TV <b>PR</b> + Acetyl (K)                                                                                  |
| b <a href="#">34</a>  | 570.2713  | 1138.5279 | 1138.5189 | 0.0090  | 1    | 26    | 0.22   | 1    | CAT <b>F</b> ERE <b>QR</b>                                                                                             |
| b <a href="#">14</a>  | 421.7588  | 841.5031  | 841.5021  | 0.0010  | 1    | 26    | 0.36   | 1    | V <b>KT</b> SL <b>PR</b> + Acetyl (K)                                                                                  |
| b <a href="#">9</a>   | 421.7576  | 841.5007  | 841.4810  | 0.0197  | 0    | 25    | 0.48   | 1    | LGTW <b>LPR</b>                                                                                                        |
| b <a href="#">110</a> | 737.7051  | 2210.0934 | 2210.0967 | -0.0033 | 0    | 25    | 0.17   | 1    | LGEHNIN <b>V</b> LEGNE <b>Q</b> FID <b>AAK</b>                                                                         |
| b <a href="#">70</a>  | 783.8732  | 1565.7318 | 1565.7184 | 0.0134  | 1    | 24    | 0.29   | 1    | E <b>K</b> DF <b>Q</b> GM <b>L</b> EY <b>HK</b> + Acetyl (K)                                                           |
| b <a href="#">11</a>  | 421.7581  | 841.5015  | 841.5021  | -0.0006 | 1    | 23    | 0.73   | 1    | V <b>KT</b> SL <b>PR</b> + Acetyl (K)                                                                                  |
| b <a href="#">15</a>  | 428.7641  | 855.5137  | 855.5112  | 0.0024  | 1    | 23    | 0.6    | 1    | AL <b>R</b> ML <b>PR</b>                                                                                               |
| b <a href="#">12</a>  | 421.7581  | 841.5015  | 841.5021  | -0.0006 | 1    | 23    | 0.8    | 1    | V <b>KT</b> SL <b>PR</b> + Acetyl (K)                                                                                  |
| b <a href="#">109</a> | 737.7026  | 2210.0860 | 2210.0967 | -0.0107 | 0    | 22    | 0.33   | 1    | LGEHNIN <b>V</b> LEGNE <b>Q</b> FID <b>AAK</b>                                                                         |
| b <a href="#">51</a>  | 673.8523  | 1345.6901 | 1345.7089 | -0.0188 | 1    | 22    | 0.82   | 1    | G <b>S</b> L <b>D</b> Q <b>S</b> L <b>K</b> D <b>L</b> T <b>LK</b> + Acetyl (K)                                        |
| b <a href="#">74</a>  | 804.8999  | 1607.7852 | 1607.7825 | 0.0027  | 1    | 22    | 0.66   | 1    | Q <b>K</b> C <b>Q</b> E <b>T</b> Q <b>T</b> I <b>S</b> S <b>LK</b>                                                     |
| b <a href="#">17</a>  | 434.7661  | 867.5177  | 867.5178  | -0.0001 | 0    | 21    | 0.35   | 1    | L <b>S</b> P <b>V</b> I <b>S</b> P <b>R</b>                                                                            |
| b <a href="#">10</a>  | 421.7579  | 841.5013  | 841.5021  | -0.0008 | 1    | 21    | 1.2    | 1    | V <b>KT</b> SL <b>PR</b> + Acetyl (K)                                                                                  |
| b <a href="#">113</a> | 737.7058  | 2210.0956 | 2210.0967 | -0.0011 | 0    | 21    | 0.4    | 1    | LGEHNIN <b>V</b> LEGNE <b>Q</b> FID <b>AAK</b>                                                                         |
| b <a href="#">80</a>  | 820.3974  | 1638.7803 | 1638.7745 | 0.0057  | 1    | 21    | 0.62   | 1    | I <b>Q</b> M <b>E</b> E <b>K</b> F <b>M</b> A <b>N</b> P <b>S</b> K + Oxidation (M)                                    |
| b <a href="#">111</a> | 737.7055  | 2210.0946 | 2210.0967 | -0.0021 | 0    | 19    | 0.68   | 1    | LGEHNIN <b>V</b> LEGNE <b>Q</b> FID <b>AAK</b>                                                                         |
| b <a href="#">115</a> | 737.7060  | 2210.0961 | 2210.0967 | -0.0006 | 0    | 19    | 0.68   | 1    | LGEHNIN <b>V</b> LEGNE <b>Q</b> FID <b>AAK</b>                                                                         |
| b <a href="#">16</a>  | 428.7683  | 855.5220  | 855.5112  | 0.0107  | 1    | 18    | 1.7    | 1    | AL <b>R</b> ML <b>PR</b>                                                                                               |
| b <a href="#">42</a>  | 617.3086  | 1232.6026 | 1232.6136 | -0.0110 | 1    | 18    | 2.3    | 1    | E <b>E</b> L <b>D</b> T <b>L</b> K <b>E</b> E <b>K</b>                                                                 |
| b <a href="#">69</a>  | 780.8978  | 1559.7811 | 1559.7977 | -0.0166 | 1    | 17    | 2.1    | 1    | E <b>A</b> T <b>A</b> I <b>N</b> M <b>K</b> N <b>E</b> A <b>L</b> Q <b>K</b>                                           |
| b <a href="#">114</a> | 737.7059  | 2210.0960 | 2210.0967 | -0.0007 | 0    | 17    | 1      | 1    | LGEHNIN <b>V</b> LEGNE <b>Q</b> FID <b>AAK</b>                                                                         |
| b <a href="#">67</a>  | 769.3233  | 1536.6321 | 1536.6258 | 0.0062  | 1    | 16    | 0.34   | 1    | M <b>V</b> S <b>S</b> G <b>M</b> Y <b>K</b> M <b>D</b> N <b>G</b> K + Acetyl (Protein N-term); 3 Oxidation (M)         |
| b <a href="#">48</a>  | 655.3226  | 1308.6307 | 1308.6271 | 0.0036  | 0    | 15    | 3.1    | 1    | M <b>E</b> L <b>G</b> E <b>L</b> L <b>Y</b> N <b>K</b> + Acetyl (K); Acetyl (Protein N-term); Oxidation (1)            |
| b <a href="#">19</a>  | 435.7742  | 869.5338  | 869.5222  | 0.0116  | 1    | 15    | 2.5    | 1    | V <b>E</b> A <b>V</b> K <b>I</b> K + 2 Acetyl (K)                                                                      |
| b <a href="#">59</a>  | 710.8391  | 1419.6637 | 1419.6816 | -0.0180 | 0    | 15    | 3.1    | 1    | L <b>W</b> E <b>I</b> G <b>N</b> M <b>L</b> D <b>T</b> G <b>R</b> + Oxidation (M)                                      |
| b <a href="#">37</a>  | 595.3283  | 1188.6421 | 1188.6462 | -0.0042 | 1    | 14    | 4.8    | 1    | I <b>T</b> D <b>T</b> I <b>S</b> D <b>R</b> L <b>R</b>                                                                 |
| b <a href="#">112</a> | 737.7058  | 2210.0955 | 2210.0967 | -0.0012 | 0    | 14    | 2.1    | 1    | LGEHNIN <b>V</b> LEGNE <b>Q</b> FID <b>AAK</b>                                                                         |
| b <a href="#">81</a>  | 830.9298  | 1659.8450 | 1659.8250 | 0.0200  | 1    | 14    | 3.8    | 1    | T <b>S</b> V <b>H</b> Q <b>E</b> T <b>K</b> S <b>M</b> L <b>L</b> D <b>R</b> + Oxidation (M)                           |
| b <a href="#">26</a>  | 510.7716  | 1019.5287 | 1019.5321 | -0.0034 | 1    | 13    | 7.9    | 1    | V <b>A</b> K <b>M</b> T <b>V</b> S <b>G</b> K + 2 Acetyl (K); Oxidation (M)                                            |
| b <a href="#">49</a>  | 655.8563  | 1309.6980 | 1309.6878 | 0.0102  | 1    | 13    | 4.2    | 1    | K <b>G</b> S <b>A</b> L <b>D</b> P <b>E</b> P <b>Q</b> V <b>K</b> + Acetyl (K)                                         |
| b <a href="#">27</a>  | 516.3026  | 1030.5907 | 1030.5733 | 0.0174  | 0    | 13    | 5      | 1    | V <b>M</b> L <b>I</b> T <b>D</b> G <b>K</b> + Acetyl (K)                                                               |
| b <a href="#">91</a>  | 882.8944  | 1763.7743 | 1763.7616 | 0.0128  | 1    | 10    | 3      | 1    | M <b>Q</b> M <b>P</b> P <b>S</b> N <b>P</b> M <b>C</b> K <b>T</b> R + Acetyl (K); Oxidation (M)                        |
| b <a href="#">44</a>  | 631.8233  | 1261.6321 | 1261.6277 | 0.0043  | 1    | 10    | 16     | 1    | L <b>Y</b> S <b>F</b> N <b>F</b> R <b>M</b> K                                                                          |
| b <a href="#">18</a>  | 435.7732  | 869.5318  | 869.5123  | 0.0195  | 0    | 10    | 10     | 1    | V <b>S</b> L <b>W</b> L <b>P</b> R                                                                                     |
| b <a href="#">62</a>  | 712.8635  | 1423.7125 | 1423.6943 | 0.0182  | 0    | 10    | 11     | 1    | I <b>A</b> E <b>S</b> L <b>G</b> S <b>G</b> S <b>G</b> S <b>V</b> E <b>R</b>                                           |
| b <a href="#">89</a>  | 864.4429  | 1726.8712 | 1726.8638 | 0.0073  | 1    | 9     | 12     | 1    | G <b>L</b> E <b>W</b> I <b>G</b> R <b>I</b> D <b>P</b> N <b>D</b> G <b>G</b> T <b>K</b>                                |
| b <a href="#">55</a>  | 696.8424  | 1391.6703 | 1391.6767 | -0.0064 | 1    | 9     | 15     | 1    | T <b>Q</b> R <b>S</b> Q <b>H</b> S <b>Q</b> H <b>A</b> R                                                               |
| b <a href="#">32</a>  | 564.2780  | 1126.5414 | 1126.5216 | 0.0198  | 0    | 9     | 12     | 1    | I <b>E</b> T <b>M</b> D <b>S</b> V <b>Y</b> K + Acetyl (K)                                                             |
| b <a href="#">23</a>  | 505.2692  | 1008.5238 | 1008.5170 | 0.0068  | 0    | 9     | 18     | 1    | M <b>V</b> G <b>T</b> V <b>I</b> M <b>M</b> K                                                                          |
| b <a href="#">119</a> | 738.0396  | 2211.0971 | 2211.1101 | -0.0131 | 1    | 9     | 6.5    | 1    | S <b>A</b> P <b>E</b> I <b>K</b> Y <b>N</b> S <b>M</b> V <b>L</b> I <b>C</b> A <b>L</b> M <b>G</b> S <b>G</b> K        |
| b <a href="#">116</a> | 737.7078  | 2210.1017 | 2210.0967 | 0.0050  | 0    | 8     | 7.2    | 1    | LGEHNIN <b>V</b> LEGNE <b>Q</b> FID <b>AAK</b>                                                                         |
| b <a href="#">75</a>  | 811.9078  | 1621.8010 | 1621.8208 | -0.0198 | 0    | 8     | 13     | 1    | G <b>V</b> Y <b>L</b> T <b>D</b> I <b>M</b> P <b>Q</b> G <b>V</b> A <b>M</b> K                                         |
| b <a href="#">61</a>  | 711.3410  | 1420.6674 | 1420.6722 | -0.0048 | 1    | 8     | 16     | 1    | S <b>K</b> D <b>D</b> S <b>P</b> S <b>Y</b> L <b>P</b> T <b>K</b> + 2 Acetyl (K)                                       |
| b <a href="#">101</a> | 1006.4891 | 2010.9636 | 2010.9834 | -0.0198 | 1    | 8     | 11     | 1    | M <b>Y</b> T <b>L</b> L <b>S</b> G <b>L</b> Y <b>K</b> Y <b>M</b> F <b>Q</b> K + 2 Acetyl (K); Acetyl (Protein N-term) |
| b <a href="#">90</a>  | 864.4432  | 1726.8718 | 1726.8638 | 0.0080  | 1    | 7     | 19     | 1    | G <b>L</b> E <b>W</b> I <b>G</b> R <b>I</b> D <b>P</b> N <b>D</b> G <b>G</b> T <b>K</b>                                |
| b <a href="#">56</a>  | 701.3608  | 1400.7071 | 1400.7035 | 0.0036  | 0    | 7     | 24     | 1    | E <b>V</b> D <b>L</b> V <b>E</b> S <b>G</b> D <b>L</b> V <b>K</b> + Acetyl (Protein N-term)                            |
| b <a href="#">6</a>   | 412.7521  | 823.4896  | 823.4916  | -0.0020 | 0    | 6     | 11     | 1    | G <b>I</b> P <b>V</b> S <b>P</b> V <b>R</b>                                                                            |

|   |                     |           |           |           |         |   |   |    |   |                                                            |
|---|---------------------|-----------|-----------|-----------|---------|---|---|----|---|------------------------------------------------------------|
| b | <a href="#">7</a>   | 412.7530  | 823.4915  | 823.4916  | -0.0001 | 0 | 6 | 11 | 1 | GIPVSPVR                                                   |
| b | <a href="#">98</a>  | 970.9708  | 1939.9270 | 1939.9172 | 0.0098  | 0 | 6 | 15 | 1 | MDQVMQFVPEPSQQFVK                                          |
| b | <a href="#">66</a>  | 760.8655  | 1519.7165 | 1519.7341 | -0.0176 | 1 | 6 | 22 | 1 | GGSAVGLKGYMAPAPS + Acetyl (K); Oxidation (M)               |
| b | <a href="#">79</a>  | 820.3954  | 1638.7762 | 1638.7606 | 0.0156  | 1 | 6 | 20 | 1 | PLCGSDGRTYAQICR                                            |
| b | <a href="#">82</a>  | 837.3885  | 1672.7625 | 1672.7540 | 0.0086  | 0 | 5 | 16 | 1 | QAEEAEQSNANLAK + Acetyl (K)                                |
| b | <a href="#">64</a>  | 752.8670  | 1503.7194 | 1503.7317 | -0.0123 | 1 | 5 | 33 | 1 | DGIQTKEHPNPGK + 2 Acetyl (K)                               |
| b | <a href="#">133</a> | 762.0587  | 2283.1544 | 2283.1482 | 0.0062  | 0 | 5 | 15 | 1 | ESSSLVQYDLIGQTVSSETIK                                      |
| b | <a href="#">106</a> | 732.0312  | 2193.0718 | 2193.0711 | 0.0007  | 0 | 5 | 16 | 1 | EMPVQFQVVELPSGHHLCK + Oxidation (M)                        |
| b | <a href="#">72</a>  | 790.8900  | 1579.7654 | 1579.7776 | -0.0122 | 1 | 5 | 38 | 1 | SFSVALQKQNNMR + Acetyl (K); Oxidation (M)                  |
| b | <a href="#">118</a> | 738.0351  | 2211.0834 | 2211.0742 | 0.0092  | 1 | 5 | 18 | 1 | VESGFHIHQGELSLRAMDK + Acetyl (K); Oxidation (M)            |
| b | <a href="#">97</a>  | 970.9697  | 1939.9249 | 1939.9230 | 0.0019  | 1 | 4 | 22 | 1 | LMEMEQTLSSLRETEK + Oxidation (M)                           |
| b | <a href="#">117</a> | 738.0335  | 2211.0788 | 2211.0920 | -0.0132 | 0 | 4 | 20 | 1 | LGEHNINVLEGNQFVNSAK                                        |
| b | <a href="#">136</a> | 762.7150  | 2285.1232 | 2285.1362 | -0.0130 | 0 | 4 | 20 | 1 | SATLMLVYEDVVQIVSGFQGAR + Oxidation (M)                     |
| b | <a href="#">95</a>  | 897.9098  | 1793.8050 | 1793.8063 | -0.0013 | 0 | 4 | 21 | 1 | MQEGDLEMTLALEEK + Acetyl (K); Oxidation (M)                |
| b | <a href="#">85</a>  | 857.4066  | 1712.7985 | 1712.8006 | -0.0020 | 1 | 3 | 27 | 1 | INPSSGDTNYNEKFK                                            |
| b | <a href="#">108</a> | 737.3612  | 2209.0618 | 2209.0573 | 0.0046  | 0 | 3 | 26 | 1 | GTEEVFQALEDNQVALSTMK                                       |
| b | <a href="#">92</a>  | 887.9549  | 1773.8952 | 1773.8819 | 0.0134  | 1 | 3 | 48 | 1 | KGDLLDAINSCTVVDK + 2 Acetyl (K)                            |
| b | <a href="#">78</a>  | 545.9461  | 1634.8165 | 1634.8165 | -0.0000 | 1 | 2 | 57 | 1 | WPQDASHLLQKDR + Acetyl (K)                                 |
| b | <a href="#">104</a> | 1042.0073 | 2082.0000 | 2081.9939 | 0.0061  | 1 | 2 | 36 | 1 | LSSSPGKTMPTTQSFASDPK + Oxidation (M)                       |
| b | <a href="#">68</a>  | 774.8655  | 1547.7165 | 1547.7063 | 0.0102  | 1 | 2 | 47 | 1 | GEEELGKSSDLEDNR                                            |
| b | <a href="#">135</a> | 762.3869  | 2284.1390 | 2284.1207 | 0.0183  | 1 | 2 | 33 | 1 | ECYPKAMHCIFVGAQSLFLK                                       |
| b | <a href="#">125</a> | 742.7056  | 2225.0948 | 2225.0773 | 0.0175  | 1 | 2 | 36 | 1 | FGLDKLLSSEGSSEMEDIDLK + Acetyl (K)                         |
| b | <a href="#">138</a> | 767.3857  | 2299.1352 | 2299.1513 | -0.0162 | 0 | 2 | 41 | 1 | NMQMMSIEILLTLLFTELAKE + Acetyl (K); 2 Oxidation (M)        |
| b | <a href="#">93</a>  | 890.8915  | 1779.7684 | 1779.7655 | 0.0029  | 0 | 2 | 17 | 1 | DDDIAALVVDNGSGMCK + Acetyl (Protein N-term); Oxidation (M) |
| b | <a href="#">139</a> | 767.3909  | 2299.1507 | 2299.1671 | -0.0164 | 1 | 1 | 36 | 1 | AHGVDKVVACTSAFLLDWPTK + Acetyl (K)                         |
| b | <a href="#">105</a> | 729.0345  | 2184.0816 | 2184.0741 | 0.0075  | 1 | 0 | 47 | 1 | ACIESRVNMVTASYITPAMK                                       |
| b | <a href="#">128</a> | 747.0480  | 2238.1221 | 2238.1236 | -0.0015 | 1 | 0 | 47 | 1 | SVVMGTDKDTVTTGLFGAMNVAKE + Acetyl (K); Oxidation (M)       |
| b | <a href="#">1</a>   | 362.2218  | 722.4291  |           |         |   |   |    |   |                                                            |
| b | <a href="#">2</a>   | 384.2350  | 766.4554  |           |         |   |   |    |   |                                                            |
| b | <a href="#">5</a>   | 406.2480  | 810.4814  |           |         |   |   |    |   |                                                            |
| b | <a href="#">21</a>  | 453.8080  | 905.6015  |           |         |   |   |    |   |                                                            |
| b | <a href="#">31</a>  | 559.7704  | 1117.5261 |           |         |   |   |    |   |                                                            |
| b | <a href="#">53</a>  | 453.8080  | 1358.4022 |           |         |   |   |    |   |                                                            |
| b | <a href="#">83</a>  | 559.9075  | 1676.7007 |           |         |   |   |    |   |                                                            |
| b | <a href="#">84</a>  | 559.9087  | 1676.7042 |           |         |   |   |    |   |                                                            |
| b | <a href="#">94</a>  | 594.2765  | 1779.8076 |           |         |   |   |    |   |                                                            |
| b | <a href="#">96</a>  | 904.9415  | 1807.8684 |           |         |   |   |    |   |                                                            |
| b | <a href="#">99</a>  | 997.4829  | 1992.9513 |           |         |   |   |    |   |                                                            |
| b | <a href="#">100</a> | 665.6223  | 1993.8452 |           |         |   |   |    |   |                                                            |
| b | <a href="#">103</a> | 1033.0008 | 2063.9870 |           |         |   |   |    |   |                                                            |
| b | <a href="#">107</a> | 1104.0569 | 2206.0992 |           |         |   |   |    |   |                                                            |
| b | <a href="#">120</a> | 742.0332  | 2223.0779 |           |         |   |   |    |   |                                                            |
| b | <a href="#">121</a> | 742.3754  | 2224.1043 |           |         |   |   |    |   |                                                            |
| b | <a href="#">122</a> | 742.3763  | 2224.1069 |           |         |   |   |    |   |                                                            |
| b | <a href="#">123</a> | 742.3764  | 2224.1073 |           |         |   |   |    |   |                                                            |
| b | <a href="#">124</a> | 742.7046  | 2225.0919 |           |         |   |   |    |   |                                                            |
| b | <a href="#">126</a> | 746.3780  | 2236.1122 |           |         |   |   |    |   |                                                            |
| b | <a href="#">127</a> | 747.0081  | 2238.0026 |           |         |   |   |    |   |                                                            |
| b | <a href="#">129</a> | 563.0185  | 2248.0448 |           |         |   |   |    |   |                                                            |
| b | <a href="#">130</a> | 567.0127  | 2264.0218 |           |         |   |   |    |   |                                                            |
| b | <a href="#">131</a> | 567.2566  | 2264.9972 |           |         |   |   |    |   |                                                            |
| b | <a href="#">132</a> | 570.5136  | 2278.0254 |           |         |   |   |    |   |                                                            |
| b | <a href="#">134</a> | 762.3868  | 2284.1387 |           |         |   |   |    |   |                                                            |
| b | <a href="#">137</a> | 766.7309  | 2297.1707 |           |         |   |   |    |   |                                                            |
| b | <a href="#">140</a> | 767.7181  | 2300.1324 |           |         |   |   |    |   |                                                            |
| b | <a href="#">141</a> | 772.0623  | 2313.1651 |           |         |   |   |    |   |                                                            |
| b | <a href="#">142</a> | 580.4893  | 2317.9283 |           |         |   |   |    |   |                                                            |

## Search Parameters

Type of search : MS/MS Ion Search  
 Enzyme : Trypsin/P  
 Variable modifications : Acetyl (K),Acetyl (Protein N-term),Oxidation (M)  
 Mass values : Monoisotopic  
 Protein Mass : Unrestricted  
 Peptide Mass Tolerance : ± 0.02 Da  
 Fragment Mass Tolerance: ± 0.3 Da  
 Max Missed Cleavages : 1  
 Instrument type : ESI-TRAP  
 Number of queries : 143

Mascot: <http://www.matrixscience.com/>

**MASCOT** Mascot Search Results

User : Bob  
 Email : rdenglis@utmb.edu  
 Search title : 11081915.raw #2289 phospho  
 MS data file : tempfile  
 Database : NCBI nr 20110707 (14481393 sequences; 4958963357 residues)  
 Taxonomy : Mus musculus (house mouse) (143921 sequences)  
 Timestamp : 24 Aug 2011 at 16:23:23 GMT  
 Protein hits : [gi|124248512](#) carbamoyl-phosphate synthase [ammonia], mitochondrial precursor [Mus musculus]  
[gi|7638398](#) epidermal keratin 10 [Mus musculus]  
[gi|12843914](#) unnamed protein product [Mus musculus]  
[gi|9910294](#) keratin, type II cytoskeletal 71 [Mus musculus]  
[gi|51092303](#) Try10-like trypsinogen [Mus musculus]

NCBI nr [Decoy](#) False discovery rate

Peptide matches above identity threshold 32 3 9.38 %  
 Peptide matches above homology or identity threshold 37 3 8.11 %

Probability Based Mowse Score

Ions score is  $-10 \cdot \log(P)$ , where P is the probability that the observed match is a random event. Individual ions scores > 31 indicate identity or extensive homology (p<0.05). Protein scores are derived from ions scores as a non-probabilistic basis for ranking protein hits.

Error: try setting browser cache to automatic.

Peptide Summary Report

Format As  [Help](#)  
 Significance threshold p<  Max. number of hits   
 Standard scoring  MudPIT scoring  Ions score or expect cut-off  Show sub-sets   
 Show pop-ups  Suppress pop-ups  Sort unassigned  Require bold red   
    Error tolerant

1. [gi|124248512](#) Mass: 164514 Score: 1653 Queries matched: 32 emPAI: 0.69  
 carbamoyl-phosphate synthase [ammonia], mitochondrial precursor [Mus musculus]  
 Check to include this hit in error tolerant search or archive report

| Query                | Observed | Mr(expt)  | Mr(calc)  | Delta   | Miss | Score | Expect   | Rank | Peptide                            |
|----------------------|----------|-----------|-----------|---------|------|-------|----------|------|------------------------------------|
| b <a href="#">3</a>  | 406.2209 | 810.4273  | 810.4276  | -0.0003 | 0    | 18    | 1.5      | 1    | R.SFPFVSK.T                        |
| b <a href="#">4</a>  | 406.2210 | 810.4274  | 810.4276  | -0.0002 | 0    | (18)  | 1.9      | 1    | R.SFPFVSK.T                        |
| b <a href="#">20</a> | 453.2577 | 904.5008  | 904.5018  | -0.0010 | 0    | 51    | 0.00056  | 1    | K.LFAEAVQK.S                       |
| b <a href="#">22</a> | 495.2792 | 988.5438  | 988.5441  | -0.0003 | 0    | 64    | 0.00015  | 1    | K.ETLIDLGTK.A                      |
| b <a href="#">24</a> | 508.2386 | 1014.4626 | 1014.4658 | -0.0032 | 0    | 34    | 0.049    | 1    | R.TFEESFQK.A                       |
| b <a href="#">25</a> | 508.8025 | 1015.5904 | 1015.5914 | -0.0010 | 0    | 36    | 0.012    | 1    | K.GTTITSVLPK.P                     |
| b <a href="#">28</a> | 518.7687 | 1035.5228 | 1035.5237 | -0.0008 | 0    | 42    | 0.0063   | 1    | K.EIEYEVVR.D                       |
| b <a href="#">29</a> | 545.7978 | 1089.5810 | 1089.5819 | -0.0009 | 0    | 52    | 0.00061  | 1    | K.VPAIYGVDTK.M                     |
| b <a href="#">30</a> | 551.8083 | 1101.6020 | 1101.6030 | -0.0009 | 0    | 63    | 4.3e-005 | 1    | K.QNLIAEVSTK.D                     |
| b <a href="#">33</a> | 568.7786 | 1135.5427 | 1135.5431 | -0.0004 | 0    | 68    | 2.1e-005 | 1    | K.VMIGESIDEK.R + Oxidation (M)     |
| b <a href="#">35</a> | 582.3728 | 1162.7311 | 1162.7325 | -0.0014 | 0    | 46    | 9.8e-005 | 1    | K.IALGIPLPEIK.N                    |
| b <a href="#">39</a> | 609.3110 | 1216.6075 | 1216.6088 | -0.0013 | 0    | 56    | 0.00025  | 1    | K.SLGQWLQEEK.V                     |
| b <a href="#">40</a> | 611.3398 | 1220.6651 | 1220.6652 | -0.0001 | 0    | 64    | 2.1e-005 | 1    | R.SIFSVAVLDELK.V                   |
| b <a href="#">41</a> | 611.8448 | 1221.6750 | 1221.6757 | -0.0007 | 0    | 43    | 0.0029   | 1    | K.ATGYPLAFIAK.I                    |
| b <a href="#">43</a> | 623.8305 | 1245.6463 | 1245.6387 | 0.0076  | 0    | 55    | 0.00033  | 1    | K.IMGTSPLQIDR.A + Oxidation (M)    |
| b <a href="#">45</a> | 639.8505 | 1277.6864 | 1277.6867 | -0.0003 | 0    | 55    | 0.00018  | 1    | K.TLGVDFIDVATK.V                   |
| b <a href="#">46</a> | 649.8343 | 1297.6540 | 1297.6554 | -0.0013 | 0    | 57    | 0.00018  | 1    | K.LYFEELSLEK.I                     |
| b <a href="#">50</a> | 661.8425 | 1321.6705 | 1321.6700 | 0.0005  | 0    | 56    | 0.00025  | 1    | K.AADTIGYVPMIR.S + Oxidation (M)   |
| b <a href="#">52</a> | 677.3653 | 1352.7161 | 1352.7160 | 0.0001  | 0    | 68    | 1.2e-005 | 1    | R.GQNQPVNLITNR.Q                   |
| b <a href="#">57</a> | 704.8639 | 1407.7132 | 1407.7180 | -0.0049 | 0    | (50)  | 0.00098  | 1    | K.AFAMTNQILVER.S + Oxidation (M)   |
| b <a href="#">58</a> | 704.8662 | 1407.7178 | 1407.7180 | -0.0003 | 0    | 65    | 3e-005   | 1    | K.AFAMTNQILVER.S + Oxidation (M)   |
| b <a href="#">60</a> | 710.8537 | 1419.6928 | 1419.6841 | 0.0087  | 0    | 85    | 3.3e-007 | 1    | K.GLNSDSVTEETLR.K                  |
| b <a href="#">65</a> | 760.3782 | 1518.7418 | 1518.7348 | 0.0071  | 0    | 72    | 6.2e-006 | 1    | K.ALENNMSLDEIVR.L + Oxidation (M)  |
| b <a href="#">71</a> | 526.6100 | 1576.8082 | 1576.8096 | -0.0014 | 1    | 30    | 0.073    | 1    | R.QLFSDKLNEINEK.I                  |
| b <a href="#">73</a> | 530.2751 | 1587.8035 | 1587.8045 | -0.0010 | 0    | 12    | 6.6      | 1    | R.FLGVAEQLHNEGFK.L                 |
| b <a href="#">76</a> | 812.3998 | 1622.7850 | 1622.7861 | -0.0012 | 0    | 74    | 3.7e-006 | 1    | K.IAPSAVESMEDALK.A + Oxidation (M) |



[gi|47059013](#) Mass: 58875 Score: 71 Queries matched: 1  
 keratin, type II cytoskeletal 73 [Mus musculus]  
[gi|51092293](#) Mass: 61322 Score: 71 Queries matched: 1  
 keratin, type II cytoskeletal 1b [Mus musculus]  
[gi|81891697](#) Mass: 54712 Score: 71 Queries matched: 1  
 RecName: Full=Keratin, type II cytoskeletal 74; AltName: Full=Keratin-74; Short=K74; AltName: Full=Type-II keratin Kb37  
[gi|115528975](#) Mass: 61265 Score: 71 Queries matched: 1  
 Keratin 77 [Mus musculus]  
[gi|126116585](#) Mass: 65565 Score: 71 Queries matched: 1  
 keratin, type II cytoskeletal 1 [Mus musculus]  
[gi|148672081](#) Mass: 43429 Score: 71 Queries matched: 1  
 mCG17589, isoform CRA\_b [Mus musculus]

5. [gi|51092303](#) Mass: 26514 Score: 66 Queries matched: 2 emPAI: 0.25  
 Try10-like trypsinogen [Mus musculus]  
 e Check to include this hit in error tolerant search or archive report

| Query                | Observed | Mr(expt)  | Mr(calc)  | Delta   | Miss | Score | Expect | Rank | Peptide                        |
|----------------------|----------|-----------|-----------|---------|------|-------|--------|------|--------------------------------|
| b <a href="#">36</a> | 588.3192 | 1174.6239 | 1174.6267 | -0.0028 | 0    | 66    | 2e-005 | 1    | K.TLDNDIMLIK.L                 |
| b <a href="#">38</a> | 596.3189 | 1190.6233 | 1190.6217 | 0.0017  | 0    | (50)  | 0.0011 | 1    | K.TLDNDIMLIK.L + Oxidation (M) |

Proteins matching the same set of peptides:

[gi|84781771](#) Mass: 26204 Score: 66 Queries matched: 2  
 trypsin 10 [Mus musculus]

Peptide matches not assigned to protein hits: (no details means no match)

| Query                 | Observed | Mr(expt)  | Mr(calc)  | Delta   | Miss | Score | Expect | Rank | Peptide                                           |
|-----------------------|----------|-----------|-----------|---------|------|-------|--------|------|---------------------------------------------------|
| b <a href="#">8</a>   | 421.7573 | 841.5001  | 841.4810  | 0.0191  | 0    | 30    | 0.069  | 1    | LGTWLR                                            |
| b <a href="#">34</a>  | 570.2713 | 1138.5279 | 1138.5189 | 0.0090  | 1    | 26    | 0.29   | 1    | CATFEREQR                                         |
| b <a href="#">9</a>   | 421.7576 | 841.5007  | 841.4810  | 0.0197  | 0    | 25    | 0.19   | 1    | LGTWLR                                            |
| b <a href="#">110</a> | 737.7051 | 2210.0934 | 2210.0967 | -0.0033 | 0    | 25    | 0.2    | 1    | LGEHNINLVLEGNEQFIDAAK                             |
| b <a href="#">15</a>  | 428.7641 | 855.5137  | 855.5112  | 0.0024  | 1    | 23    | 0.29   | 1    | ALRMLPR                                           |
| b <a href="#">109</a> | 737.7026 | 2210.0860 | 2210.0967 | -0.0107 | 0    | 22    | 0.37   | 1    | LGEHNINLVLEGNEQFIDAAK                             |
| b <a href="#">74</a>  | 804.8999 | 1607.7852 | 1607.7825 | 0.0027  | 1    | 22    | 0.64   | 1    | QKQDETQTISLK                                      |
| b <a href="#">17</a>  | 434.7661 | 867.5177  | 867.5178  | -0.0001 | 0    | 21    | 0.18   | 1    | LSPVISPR                                          |
| b <a href="#">113</a> | 737.7058 | 2210.0956 | 2210.0967 | -0.0011 | 0    | 21    | 0.49   | 1    | LGEHNINLVLEGNEQFIDAAK                             |
| b <a href="#">80</a>  | 820.3974 | 1638.7803 | 1638.7745 | 0.0057  | 1    | 21    | 0.74   | 1    | IQMEKFMANPSK + Oxidation (M)                      |
| b <a href="#">12</a>  | 421.7581 | 841.5015  | 841.5021  | -0.0006 | 1    | 19    | 0.81   | 1    | LKESLPR                                           |
| b <a href="#">111</a> | 737.7055 | 2210.0946 | 2210.0967 | -0.0021 | 0    | 19    | 0.79   | 1    | LGEHNINLVLEGNEQFIDAAK                             |
| b <a href="#">115</a> | 737.7060 | 2210.0961 | 2210.0967 | -0.0006 | 0    | 19    | 0.83   | 1    | LGEHNINLVLEGNEQFIDAAK                             |
| b <a href="#">11</a>  | 421.7581 | 841.5015  | 841.5134  | -0.0118 | 1    | 18    | 0.93   | 1    | VIRALDR                                           |
| b <a href="#">16</a>  | 428.7683 | 855.5220  | 855.5112  | 0.0107  | 1    | 18    | 0.74   | 1    | ALRMLPR                                           |
| b <a href="#">42</a>  | 617.3086 | 1232.6026 | 1232.6136 | -0.0110 | 1    | 18    | 1.8    | 1    | EELDTLKEEK                                        |
| b <a href="#">69</a>  | 780.8978 | 1559.7811 | 1559.7977 | -0.0166 | 1    | 17    | 1.6    | 1    | EATAINMKNEALQK                                    |
| b <a href="#">14</a>  | 421.7588 | 841.5031  | 841.5021  | 0.0010  | 1    | 17    | 1.2    | 1    | LKESLPR                                           |
| b <a href="#">114</a> | 737.7059 | 2210.0960 | 2210.0967 | -0.0007 | 0    | 17    | 1.3    | 1    | LGEHNINLVLEGNEQFIDAAK                             |
| b <a href="#">10</a>  | 421.7579 | 841.5013  | 841.5021  | -0.0008 | 0    | 15    | 1.8    | 1    | LSVALSPR                                          |
| b <a href="#">55</a>  | 696.8424 | 1391.6703 | 1391.6810 | -0.0107 | 0    | 15    | 3.4    | 1    | QGSLLIQVPSVER + Phospho (ST)                      |
| b <a href="#">59</a>  | 710.8391 | 1419.6637 | 1419.6816 | -0.0180 | 0    | 15    | 3.6    | 1    | LWEIGNMLDTGR + Oxidation (M)                      |
| b <a href="#">37</a>  | 595.3283 | 1188.6421 | 1188.6462 | -0.0042 | 1    | 14    | 2.9    | 1    | ITDTISDRLR                                        |
| b <a href="#">13</a>  | 421.7582 | 841.5019  | 841.5021  | -0.0002 | 0    | 14    | 2.4    | 1    | LSVALSPR                                          |
| b <a href="#">112</a> | 737.7058 | 2210.0955 | 2210.0967 | -0.0012 | 0    | 14    | 2.5    | 1    | LGEHNINLVLEGNEQFIDAAK                             |
| b <a href="#">51</a>  | 673.8523 | 1345.6901 | 1345.6725 | 0.0176  | 0    | 14    | 3.5    | 1    | SASQNETIEDLIK                                     |
| b <a href="#">56</a>  | 701.3608 | 1400.7071 | 1400.7139 | -0.0067 | 0    | 14    | 4.2    | 1    | MVFITVIEQLR + Phospho (ST)                        |
| b <a href="#">81</a>  | 830.9298 | 1659.8450 | 1659.8250 | 0.0200  | 1    | 14    | 3.1    | 1    | TSVHQETKSMLLDR + Oxidation (M)                    |
| b <a href="#">62</a>  | 712.8635 | 1423.7125 | 1423.7072 | 0.0053  | 1    | 13    | 4.5    | 1    | AENSSLNLIGKAK + Phospho (ST)                      |
| b <a href="#">44</a>  | 631.8233 | 1261.6321 | 1261.6180 | 0.0141  | 1    | 12    | 6.1    | 1    | AVSGLHSLKDR + Phospho (ST)                        |
| b <a href="#">85</a>  | 857.4066 | 1712.7985 | 1712.8056 | -0.0070 | 1    | 11    | 7.8    | 1    | TSDDLKILANADTMK + Oxidation (M); Phospho (ST)     |
| b <a href="#">105</a> | 729.0345 | 2184.0816 | 2184.0690 | 0.0126  | 0    | 11    | 4.6    | 1    | MTGLESLVVGEVLQLPFR + Phospho (ST)                 |
| b <a href="#">26</a>  | 510.7716 | 1019.5287 | 1019.5334 | -0.0047 | 1    | 11    | 9      | 1    | MSLRTWAR                                          |
| b <a href="#">70</a>  | 783.8732 | 1565.7318 | 1565.7243 | 0.0076  | 1    | 10    | 11     | 1    | ETSELKEAMEQQK + Oxidation (M)                     |
| b <a href="#">124</a> | 742.7046 | 2225.0919 | 2225.1068 | -0.0149 | 1    | 10    | 6.4    | 1    | SGKIQPYVMSNLPVTLWGR + Phospho (Y)                 |
| b <a href="#">18</a>  | 435.7732 | 869.5318  | 869.5123  | 0.0195  | 0    | 10    | 4.7    | 1    | VSLWLR                                            |
| b <a href="#">82</a>  | 837.3885 | 1672.7625 | 1672.7644 | -0.0018 | 1    | 10    | 12     | 1    | KSLFSQQSNPCNLK + Phospho (ST)                     |
| b <a href="#">49</a>  | 655.8563 | 1309.6980 | 1309.7159 | -0.0179 | 1    | 10    | 6.8    | 1    | KTLLQYVPIR + Phospho (Y)                          |
| b <a href="#">89</a>  | 864.4429 | 1726.8712 | 1726.8638 | 0.0073  | 1    | 9     | 8.9    | 1    | GLEWIGRIDPDGGTK                                   |
| b <a href="#">32</a>  | 564.2780 | 1126.5414 | 1126.5457 | -0.0044 | 0    | 9     | 13     | 1    | LVSCVQLASK + Phospho (ST)                         |
| b <a href="#">23</a>  | 505.2692 | 1008.5238 | 1008.5170 | 0.0068  | 0    | 9     | 15     | 1    | MVGTVIMMK                                         |
| b <a href="#">92</a>  | 887.9549 | 1773.8952 | 1773.8848 | 0.0104  | 1    | 9     | 9.7    | 1    | TVKLPQDHATIVCAAK + Phospho (ST)                   |
| b <a href="#">119</a> | 738.0396 | 2211.0971 | 2211.1101 | -0.0131 | 1    | 9     | 8.7    | 1    | SAPEIKYNSMVLICALMGSGK                             |
| b <a href="#">27</a>  | 516.3026 | 1030.5907 | 1030.6022 | -0.0116 | 1    | 8     | 8.1    | 1    | NKITLTVDK                                         |
| b <a href="#">116</a> | 737.7078 | 2210.1017 | 2210.0967 | 0.0050  | 0    | 8     | 8.1    | 1    | LGEHNINLVLEGNEQFIDAAK                             |
| b <a href="#">48</a>  | 655.3226 | 1308.6307 | 1308.6198 | 0.0109  | 0    | 8     | 18     | 1    | VGDTGDFSVLDLQK                                    |
| b <a href="#">68</a>  | 774.8655 | 1547.7165 | 1547.7246 | -0.0081 | 1    | 8     | 17     | 1    | WAAGQNKQHSITK + Phospho (ST)                      |
| b <a href="#">75</a>  | 811.9078 | 1621.8010 | 1621.8208 | -0.0198 | 0    | 8     | 14     | 1    | GVYLLDIMPQGVAMK                                   |
| b <a href="#">99</a>  | 997.4829 | 1992.9513 | 1992.9492 | 0.0021  | 1    | 8     | 13     | 1    | MGAGSRSGVVEGLPAVPWK + Oxidation (M); Phospho (ST) |



|   |                     |           |           |           |         |   |   |     |   |                                                                                           |
|---|---------------------|-----------|-----------|-----------|---------|---|---|-----|---|-------------------------------------------------------------------------------------------|
| b | <a href="#">79</a>  | 820.3954  | 1638.7762 | 1638.7800 | -0.0038 | 1 | 8 | 14  | 1 | GQLASKSTILSCSHK + Phospho (ST)                                                            |
| b | <a href="#">95</a>  | 897.9098  | 1793.8050 | 1793.8059 | -0.0009 | 1 | 8 | 17  | 1 | EFLGTTQTASFCGPKK + Phospho (ST)                                                           |
| b | <a href="#">64</a>  | 752.8670  | 1503.7194 | 1503.7195 | -0.0000 | 1 | 8 | 18  | 1 | AVRDLEAALS <del>S</del> HR + Phospho (ST)                                                 |
| b | <a href="#">90</a>  | 864.4432  | 1726.8718 | 1726.8638 | 0.0080  | 1 | 7 | 13  | 1 | GLEWIGRIDPNDGGTK                                                                          |
| b | <a href="#">61</a>  | 711.3410  | 1420.6674 | 1420.6550 | 0.0124  | 1 | 7 | 20  | 1 | AMLA <del>T</del> RSASLLK + 2 Phospho (ST)                                                |
| b | <a href="#">67</a>  | 769.3233  | 1536.6321 | 1536.6230 | 0.0090  | 1 | 7 | 22  | 1 | MKNL <del>F</del> SNMAL <del>S</del> R + Oxidation (M); 2 Phospho (ST)                    |
| b | <a href="#">117</a> | 738.0335  | 2211.0788 | 2211.0985 | -0.0198 | 0 | 7 | 13  | 1 | NWQHII <del>M</del> VVLA <del>M</del> LGVTK + Oxidation (M); Phospho (Y)                  |
| b | <a href="#">142</a> | 580.4893  | 2317.9283 | 2317.9416 | -0.0133 | 1 | 7 | 20  | 1 | <del>S</del> GNII <del>N</del> MSSVASSIKGVENR + Oxidation (M); 3 Phospho (ST)             |
| b | <a href="#">130</a> | 567.0127  | 2264.0218 | 2264.0087 | 0.0131  | 1 | 6 | 20  | 1 | ARALLA <del>S</del> TAL <del>S</del> TAVD <del>N</del> SGSGDK + 2 Phospho (ST)            |
| b | <a href="#">6</a>   | 412.7521  | 823.4896  | 823.4916  | -0.0020 | 0 | 6 | 6.8 | 1 | GIPVSPVR                                                                                  |
| b | <a href="#">72</a>  | 790.8900  | 1579.7654 | 1579.7503 | 0.0151  | 1 | 6 | 27  | 1 | TKYLQILT <del>S</del> MMR + Oxidation (M); Phospho (ST)                                   |
| b | <a href="#">7</a>   | 412.7530  | 823.4915  | 823.4916  | -0.0001 | 0 | 6 | 6.8 | 1 | GIPVSPVR                                                                                  |
| b | <a href="#">98</a>  | 970.9708  | 1939.9270 | 1939.9172 | 0.0098  | 0 | 6 | 21  | 1 | MDQVMQFV <del>F</del> EPSQQFVK                                                            |
| b | <a href="#">125</a> | 742.7056  | 2225.0948 | 2225.0970 | -0.0022 | 1 | 6 | 15  | 1 | <del>S</del> VIQRQSALGPIISVTP <del>S</del> GR + 2 Phospho (ST)                            |
| b | <a href="#">91</a>  | 882.8944  | 1763.7743 | 1763.7685 | 0.0058  | 0 | 5 | 32  | 1 | QISYPY <del>S</del> AQVPPVR + Phospho (ST); Phospho (Y)                                   |
| b | <a href="#">133</a> | 762.0587  | 2283.1544 | 2283.1482 | 0.0062  | 0 | 5 | 16  | 1 | ESSSLVQYDLIGQTVSSETIK                                                                     |
| b | <a href="#">106</a> | 732.0312  | 2193.0718 | 2193.0711 | 0.0007  | 0 | 5 | 20  | 1 | EMPVQFQV <del>V</del> ELPSGHHLCK + Oxidation (M)                                          |
| b | <a href="#">97</a>  | 970.9697  | 1939.9249 | 1939.9230 | 0.0019  | 1 | 4 | 30  | 1 | LMEMEQTLS <del>S</del> LRETEK + Oxidation (M)                                             |
| b | <a href="#">100</a> | 665.6223  | 1993.8452 | 1993.8340 | 0.0112  | 0 | 4 | 34  | 1 | LNEVQSFSE <del>T</del> ETEMVR + Oxidation (M); Phospho (ST)                               |
| b | <a href="#">136</a> | 762.7150  | 2285.1232 | 2285.1362 | -0.0130 | 0 | 4 | 21  | 1 | SATLMVYEDV <del>V</del> QIVSGFQGAR + Oxidation (M)                                        |
| b | <a href="#">128</a> | 747.0480  | 2238.1221 | 2238.1231 | -0.0010 | 0 | 4 | 18  | 1 | FLMQNLSL <del>P</del> NS <del>T</del> AQALLAAR + Phospho (ST)                             |
| b | <a href="#">66</a>  | 760.8655  | 1519.7165 | 1519.7048 | 0.0117  | 1 | 4 | 42  | 1 | ILDSSIN <del>T</del> LK <del>T</del> R + 2 Phospho (ST)                                   |
| b | <a href="#">108</a> | 737.3612  | 2209.0618 | 2209.0573 | 0.0046  | 0 | 3 | 33  | 1 | GTEEVQALE <del>D</del> NQVALSTMK                                                          |
| b | <a href="#">121</a> | 742.3754  | 2224.1043 | 2224.0889 | 0.0154  | 1 | 3 | 27  | 1 | LQGVLEG <del>T</del> LNSKTYDTLHR + Phospho (ST)                                           |
| b | <a href="#">19</a>  | 435.7742  | 869.5338  | 869.5487  | -0.0149 | 0 | 3 | 22  | 1 | LWVALLR                                                                                   |
| b | <a href="#">78</a>  | 545.9461  | 1634.8165 | 1634.8277 | -0.0112 | 1 | 2 | 42  | 1 | DHPHTAAYLRELGR                                                                            |
| b | <a href="#">104</a> | 1042.0073 | 2082.0000 | 2081.9939 | 0.0061  | 1 | 2 | 41  | 1 | LSSSPGK <del>T</del> MP <del>T</del> TSFASDPK + Oxidation (M)                             |
| b | <a href="#">135</a> | 762.3869  | 2284.1390 | 2284.1207 | 0.0183  | 1 | 2 | 30  | 1 | ECYPKAMHCIFVGAQSLFLK                                                                      |
| b | <a href="#">93</a>  | 890.8915  | 1779.7684 | 1779.7750 | -0.0066 | 0 | 1 | 83  | 1 | LQSM <del>P</del> TSGLP <del>E</del> EHK + Oxidation (M); Phospho (ST)                    |
| b | <a href="#">139</a> | 767.3909  | 2299.1507 | 2299.1382 | 0.0125  | 1 | 1 | 41  | 1 | GVDSILE <del>V</del> DV <del>N</del> SLK <del>M</del> AVVSK + Oxidation (M); Phospho (ST) |
| b | <a href="#">84</a>  | 559.9087  | 1676.7042 | 1676.6994 | 0.0048  | 1 | 0 | 93  | 1 | NLTVSS <del>P</del> QMR <del>P</del> SGK + Oxidation (M); 2 Phospho (ST)                  |
| b | <a href="#">122</a> | 742.3763  | 2224.1069 | 2224.0889 | 0.0180  | 1 | 0 | 54  | 1 | LQGVLEG <del>T</del> LNSKTYDTLHR + Phospho (ST)                                           |
| b | <a href="#">1</a>   | 362.2218  | 722.4291  |           |         |   |   |     |   |                                                                                           |
| b | <a href="#">2</a>   | 384.2350  | 766.4554  |           |         |   |   |     |   |                                                                                           |
| b | <a href="#">5</a>   | 406.2480  | 810.4814  |           |         |   |   |     |   |                                                                                           |
| b | <a href="#">21</a>  | 453.8080  | 905.6015  |           |         |   |   |     |   |                                                                                           |
| b | <a href="#">31</a>  | 559.7704  | 1117.5261 |           |         |   |   |     |   |                                                                                           |
| b | <a href="#">53</a>  | 453.8080  | 1358.4022 |           |         |   |   |     |   |                                                                                           |
| b | <a href="#">83</a>  | 559.9075  | 1676.7007 |           |         |   |   |     |   |                                                                                           |
| b | <a href="#">94</a>  | 594.2765  | 1779.8076 |           |         |   |   |     |   |                                                                                           |
| b | <a href="#">96</a>  | 904.9415  | 1807.8684 |           |         |   |   |     |   |                                                                                           |
| b | <a href="#">101</a> | 1006.4891 | 2010.9636 |           |         |   |   |     |   |                                                                                           |
| b | <a href="#">103</a> | 1033.0008 | 2063.9870 |           |         |   |   |     |   |                                                                                           |
| b | <a href="#">107</a> | 1104.0569 | 2206.0992 |           |         |   |   |     |   |                                                                                           |
| b | <a href="#">118</a> | 738.0351  | 2211.0834 |           |         |   |   |     |   |                                                                                           |
| b | <a href="#">120</a> | 742.0332  | 2223.0779 |           |         |   |   |     |   |                                                                                           |
| b | <a href="#">123</a> | 742.3764  | 2224.1073 |           |         |   |   |     |   |                                                                                           |
| b | <a href="#">126</a> | 746.3780  | 2236.1122 |           |         |   |   |     |   |                                                                                           |
| b | <a href="#">127</a> | 747.0081  | 2238.0026 |           |         |   |   |     |   |                                                                                           |
| b | <a href="#">129</a> | 563.0185  | 2248.0448 |           |         |   |   |     |   |                                                                                           |
| b | <a href="#">131</a> | 567.2566  | 2264.9972 |           |         |   |   |     |   |                                                                                           |
| b | <a href="#">132</a> | 570.5136  | 2278.0254 |           |         |   |   |     |   |                                                                                           |
| b | <a href="#">134</a> | 762.3868  | 2284.1387 |           |         |   |   |     |   |                                                                                           |
| b | <a href="#">137</a> | 766.7309  | 2297.1707 |           |         |   |   |     |   |                                                                                           |
| b | <a href="#">138</a> | 767.3857  | 2299.1352 |           |         |   |   |     |   |                                                                                           |
| b | <a href="#">140</a> | 767.7181  | 2300.1324 |           |         |   |   |     |   |                                                                                           |
| b | <a href="#">141</a> | 772.0623  | 2313.1651 |           |         |   |   |     |   |                                                                                           |

## Search Parameters

Type of search : MS/MS Ion Search  
 Enzyme : Trypsin/P  
 Variable modifications : Oxidation (M),Phospho (ST),Phospho (Y)  
 Mass values : Monoisotopic  
 Protein Mass : Unrestricted  
 Peptide Mass Tolerance : ± 0.02 Da  
 Fragment Mass Tolerance: ± 0.3 Da  
 Max Missed Cleavages : 1  
 Instrument type : ESI-TRAP  
 Number of queries : 143

Mascot: <http://www.matrixscience.com/>

**MASCOT SCIENCE Mascot Search Results**

User : Bob  
 Email : rdenglis@utmb.edu  
 Search title : 11081916.raw #2298 acetylation  
 MS data file : tempfile  
 Database : NCBI nr 20110707 (14481393 sequences; 4958963357 residues)  
 Taxonomy : Mus musculus (house mouse) (143921 sequences)  
 Timestamp : 24 Aug 2011 at 16:29:25 GMT  
 Protein hits : [gi|124248512](#) carbamoyl-phosphate synthase [ammonia], mitochondrial precursor [Mus musculus]  
               [gi|51092303](#) Try10-like trypsinogen [Mus musculus]  
               [gi|3093758](#) cyclic AMP specific phosphodiesterase PDE4D5A [Mus musculus]

NCBI nr [Decoy](#) False discovery rate

Peptide matches above identity threshold 28 1 3.57 %  
 Peptide matches above homology or identity threshold 29 2 6.90 %

**Probability Based Mowse Score**

Ions score is  $-10 \cdot \log(P)$ , where P is the probability that the observed match is a random event. Individual ions scores > 32 indicate identity or extensive homology (p<0.05). Protein scores are derived from ions scores as a non-probabilistic basis for ranking protein hits.

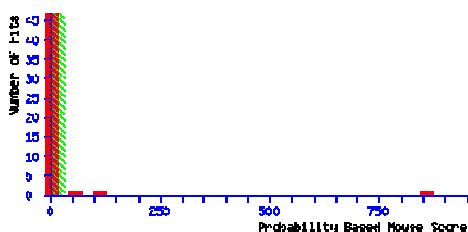

**Peptide Summary Report**

Format As   [Help](#)

Significance threshold p<  Max. number of hits

Standard scoring  MudPIT scoring  Ions score or expect cut-off  Show sub-sets

Show pop-ups  Suppress pop-ups  Sort unassigned   Require bold red

Error tolerant

1. [gi|124248512](#) Mass: 164514 Score: 857 Queries matched: 28 emPAI: 0.63  
 carbamoyl-phosphate synthase [ammonia], mitochondrial precursor [Mus musculus]  
 Check to include this hit in error tolerant search or archive report

| Query                | Observed | Mr (expt) | Mr (calc) | Delta   | Miss | Score | Expect   | Rank | Peptide                             |
|----------------------|----------|-----------|-----------|---------|------|-------|----------|------|-------------------------------------|
| b <a href="#">23</a> | 406.2211 | 810.4277  | 810.4276  | 0.0001  | 0    | 17    | 2.6      | 1    | R.SFPFVSK.T                         |
| b <a href="#">23</a> | 453.2581 | 904.5017  | 904.5018  | -0.0001 | 0    | 54    | 0.00043  | 1    | K.LFAEAVQK.S                        |
| b <a href="#">26</a> | 495.2793 | 988.5440  | 988.5441  | -0.0000 | 0    | 45    | 0.014    | 1    | K.ETLIDLGTK.A                       |
| b <a href="#">28</a> | 508.2387 | 1014.4629 | 1014.4658 | -0.0029 | 0    | 35    | 0.025    | 1    | R.TFEESFQK.A                        |
| b <a href="#">29</a> | 508.8030 | 1015.5914 | 1015.5914 | -0.0000 | 0    | 45    | 0.0024   | 1    | K.GTTTISVLPK.P                      |
| b <a href="#">32</a> | 518.7715 | 1035.5284 | 1035.5237 | 0.0048  | 0    | 53    | 0.00084  | 1    | K.EIEYEVVR.D                        |
| b <a href="#">34</a> | 545.7982 | 1089.5819 | 1089.5819 | 0.0000  | 0    | 55    | 0.00051  | 1    | K.VPAIYGVDT.R.M                     |
| b <a href="#">35</a> | 551.8089 | 1101.6031 | 1101.6030 | 0.0002  | 0    | 40    | 0.016    | 1    | K.QNLIAEVSTK.D                      |
| b <a href="#">37</a> | 568.7791 | 1135.5437 | 1135.5431 | 0.0006  | 0    | 60    | 0.00014  | 1    | K.VMIGESIDEK.R + Oxidation (M)      |
| b <a href="#">40</a> | 582.3737 | 1162.7329 | 1162.7325 | 0.0004  | 0    | 41    | 0.00032  | 1    | K.IALGIPLPEIK.N                     |
| b <a href="#">44</a> | 609.3116 | 1216.6087 | 1216.6088 | -0.0001 | 0    | 60    | 0.00016  | 1    | K.SLQWQLQEEK.V                      |
| b <a href="#">45</a> | 611.3386 | 1220.6626 | 1220.6652 | -0.0026 | 0    | 64    | 3.7e-005 | 1    | R.SIFSAVLDELK.V                     |
| b <a href="#">46</a> | 611.8452 | 1221.6758 | 1221.6757 | 0.0001  | 0    | 48    | 0.001    | 1    | K.ATGYPLAFIAAK.I                    |
| b <a href="#">47</a> | 623.8266 | 1245.6386 | 1245.6387 | -0.0001 | 0    | 58    | 0.00025  | 1    | K.IMGTSPLQIDR.A + Oxidation (M)     |
| b <a href="#">49</a> | 639.8508 | 1277.6870 | 1277.6867 | 0.0002  | 0    | 66    | 2.4e-005 | 1    | K.TLGVDFIDVATK.V                    |
| b <a href="#">50</a> | 649.8349 | 1297.6552 | 1297.6554 | -0.0002 | 0    | 55    | 0.0003   | 1    | K.LYFEELSLEK.I                      |
| b <a href="#">52</a> | 661.8428 | 1321.6710 | 1321.6700 | 0.0010  | 0    | 64    | 4.9e-005 | 1    | K.AADTIGYPMVIR.S + Oxidation (M)    |
| b <a href="#">54</a> | 677.3659 | 1352.7172 | 1352.7160 | 0.0012  | 0    | 83    | 5.8e-007 | 1    | R.GQNQPVLNITNR.Q                    |
| b <a href="#">57</a> | 704.8664 | 1407.7183 | 1407.7180 | 0.0003  | 0    | 67    | 2.2e-005 | 1    | K.AFAMTNQILVER.S + Oxidation (M)    |
| b <a href="#">59</a> | 710.8495 | 1419.6844 | 1419.6841 | 0.0003  | 0    | 85    | 3.4e-007 | 1    | K.GLNSDSVTEETLR.K                   |
| b <a href="#">63</a> | 760.3750 | 1518.7354 | 1518.7348 | 0.0007  | 0    | 72    | 6.6e-006 | 1    | K.ALENNMSLDEIVR.L + Oxidation (M)   |
| b <a href="#">68</a> | 526.6110 | 1576.8112 | 1576.8096 | 0.0015  | 1    | 15    | 3.1      | 1    | R.QLFSDKLNEINEK.I                   |
| b <a href="#">70</a> | 530.2754 | 1587.8043 | 1587.8045 | -0.0003 | 0    | 24    | 0.33     | 1    | R.FLGVAEQLHNEGFK.L                  |
| b <a href="#">73</a> | 812.3985 | 1622.7825 | 1622.7822 | 0.0003  | 0    | 117   | 1.9e-010 | 1    | K.VLGTSVESIMATEDR.Q + Oxidation (M) |
| b <a href="#">74</a> | 812.3997 | 1622.7848 | 1622.7861 | -0.0013 | 0    | 79    | 1.2e-006 | 1    | K.IAPSFVAVSMDALK.A + Oxidation (M)  |
| b <a href="#">80</a> | 862.4119 | 1722.8092 | 1722.8101 | -0.0009 | 0    | 74    | 2.8e-006 | 1    | K.IEFEGQSVDFVDPNK.Q                 |
| b <a href="#">81</a> | 863.9518 | 1725.8891 | 1725.8897 | -0.0006 | 0    | 70    | 7.5e-006 | 1    | R.DGSIDLVINLPNNNTK.F                |

b [144](#) 936.4748 2806.4025 2806.4025 0.0000 1 53 0.00014 1 K.IEFEGQSVDFVDPNKQNLIAEVSTK.D

2. [gi|51092303](#) Mass: 26514 Score: 94 Queries matched: 2 emPAI: 0.25

Try10-like trypsinogen [Mus musculus]

e Check to include this hit in error tolerant search or archive report

| Query                | Observed | Mr(expt)  | Mr(calc)  | Delta   | Miss | Score | Expect   | Rank | Peptide                        |
|----------------------|----------|-----------|-----------|---------|------|-------|----------|------|--------------------------------|
| b <a href="#">41</a> | 588.3195 | 1174.6244 | 1174.6267 | -0.0024 | 0    | (49)  | 0.0019   | 1    | K.TLDNDIMLIK.L                 |
| b <a href="#">43</a> | 596.3178 | 1190.6211 | 1190.6217 | -0.0006 | 0    | 76    | 3.7e-006 | 1    | K.TLDNDIMLIK.L + Oxidation (M) |

Proteins matching the same set of peptides:

[gi|84781771](#) Mass: 26204 Score: 94 Queries matched: 2  
trypsin 10 [Mus musculus]

3. [gi|3093758](#) Mass: 23890 Score: 38 Queries matched: 1 emPAI: 0.13

cyclic AMP specific phosphodiesterase PDE4D5A [Mus musculus]

e Check to include this hit in error tolerant search or archive report

| Query                | Observed | Mr(expt) | Mr(calc) | Delta   | Miss | Score | Expect | Rank | Peptide      |
|----------------------|----------|----------|----------|---------|------|-------|--------|------|--------------|
| b <a href="#">18</a> | 434.7655 | 867.5164 | 867.5178 | -0.0014 | 0    | 38    | 0.0083 | 1    | K.LSPVISPR.N |

Proteins matching the same set of peptides:

[gi|148686495](#) Mass: 79441 Score: 38 Queries matched: 1  
phosphodiesterase 4D, cAMP specific, isoform CRA\_c [Mus musculus]

Peptide matches not assigned to protein hits: (no details means no match)

| Query                 | Observed | Mr(expt)  | Mr(calc)  | Delta   | Miss | Score | Expect | Rank | Peptide                                                         |
|-----------------------|----------|-----------|-----------|---------|------|-------|--------|------|-----------------------------------------------------------------|
| b <a href="#">8</a>   | 421.7574 | 841.5002  | 841.4810  | 0.0192  | 0    | 30    | 0.15   | 1    | LGTWLP                                                          |
| b <a href="#">7</a>   | 421.7572 | 841.4998  | 841.4810  | 0.0188  | 0    | 30    | 0.17   | 1    | LGTWLP                                                          |
| b <a href="#">12</a>  | 421.7584 | 841.5023  | 841.5021  | 0.0002  | 1    | 27    | 0.31   | 1    | VKTSLPR + Acetyl (K)                                            |
| b <a href="#">67</a>  | 783.8735 | 1565.7324 | 1565.7184 | 0.0140  | 1    | 25    | 0.26   | 1    | EKDFQGMLEYHK + Acetyl (K)                                       |
| b <a href="#">10</a>  | 421.7583 | 841.5021  | 841.5021  | -0.0001 | 1    | 23    | 0.72   | 1    | VKTSLPR + Acetyl (K)                                            |
| b <a href="#">11</a>  | 421.7584 | 841.5022  | 841.5021  | 0.0001  | 1    | 23    | 0.78   | 1    | VKTSLPR + Acetyl (K)                                            |
| b <a href="#">13</a>  | 421.7586 | 841.5025  | 841.5021  | 0.0004  | 1    | 23    | 0.8    | 1    | VKTSLPR + Acetyl (K)                                            |
| b <a href="#">9</a>   | 421.7582 | 841.5019  | 841.5021  | -0.0002 | 1    | 23    | 0.8    | 1    | VKTSLPR + Acetyl (K)                                            |
| b <a href="#">100</a> | 737.7061 | 2210.0964 | 2210.0967 | -0.0003 | 0    | 22    | 0.33   | 1    | LGEHNINVLEGNEQFIDAAK                                            |
| b <a href="#">17</a>  | 428.7655 | 855.5165  | 855.5112  | 0.0052  | 1    | 21    | 0.91   | 1    | ALRMLPR                                                         |
| b <a href="#">99</a>  | 737.7060 | 2210.0961 | 2210.0967 | -0.0006 | 0    | 21    | 0.38   | 1    | LGEHNINVLEGNEQFIDAAK                                            |
| b <a href="#">97</a>  | 737.7046 | 2210.0919 | 2210.0967 | -0.0048 | 0    | 21    | 0.39   | 1    | LGEHNINVLEGNEQFIDAAK                                            |
| b <a href="#">102</a> | 737.7062 | 2210.0969 | 2210.0967 | 0.0001  | 0    | 20    | 0.47   | 1    | LGEHNINVLEGNEQFIDAAK                                            |
| b <a href="#">53</a>  | 673.8529 | 1345.6913 | 1345.7089 | -0.0176 | 1    | 19    | 1.7    | 1    | GSLDQSLKDTLK + Acetyl (K)                                       |
| b <a href="#">33</a>  | 536.3241 | 1070.6337 | 1070.6196 | 0.0141  | 1    | 18    | 0.86   | 1    | DLQLRVTR                                                        |
| b <a href="#">66</a>  | 780.8984 | 1559.7822 | 1559.7654 | 0.0168  | 0    | 18    | 1.9    | 1    | QWGLLCDLLEQDK                                                   |
| b <a href="#">16</a>  | 428.7649 | 855.5153  | 855.5178  | -0.0025 | 0    | 17    | 2.3    | 1    | EAALIALR                                                        |
| b <a href="#">20</a>  | 435.7759 | 869.5372  | 869.5222  | 0.0150  | 1    | 17    | 1.6    | 1    | VEAVKIK + 2 Acetyl (K)                                          |
| b <a href="#">101</a> | 737.7061 | 2210.0965 | 2210.0967 | -0.0002 | 0    | 16    | 1.1    | 1    | LGEHNINVLEGNEQFIDAAK                                            |
| b <a href="#">42</a>  | 595.3272 | 1188.6399 | 1188.6462 | -0.0063 | 1    | 16    | 2.9    | 1    | ITDTISDRLR                                                      |
| b <a href="#">14</a>  | 427.7583 | 853.5020  | 853.4844  | 0.0176  | 1    | 16    | 1.7    | 1    | LQVMGHK + Acetyl (K)                                            |
| b <a href="#">76</a>  | 820.3979 | 1638.7812 | 1638.7745 | 0.0067  | 1    | 15    | 2.1    | 1    | IQMEEKFMAANPSK + Oxidation (M)                                  |
| b <a href="#">51</a>  | 655.3228 | 1308.6309 | 1308.6271 | 0.0038  | 0    | 15    | 3.4    | 1    | MELGELLYNK + Acetyl (K); Acetyl (Protein N-term); Oxidation (I) |
| b <a href="#">71</a>  | 804.9005 | 1607.7865 | 1607.7825 | 0.0041  | 1    | 15    | 3.2    | 1    | QKQDETQTISLK                                                    |
| b <a href="#">85</a>  | 894.9596 | 1787.9046 | 1787.8975 | 0.0072  | 1    | 14    | 2.9    | 1    | SLESMLSKNALDPTK + Acetyl (K); Oxidation (M)                     |
| b <a href="#">31</a>  | 512.2410 | 1022.4674 | 1022.4491 | 0.0183  | 0    | 14    | 3.8    | 1    | STMNWNTK + Acetyl (K)                                           |
| b <a href="#">30</a>  | 510.7715 | 1019.5285 | 1019.5182 | 0.0103  | 1    | 14    | 7.3    | 1    | MRDLGVASR + Oxidation (M)                                       |
| b <a href="#">88</a>  | 961.9653 | 1921.9160 | 1921.9356 | -0.0195 | 1    | 13    | 2.8    | 1    | MEWQLKAQELDPAGHK + Acetyl (K)                                   |
| b <a href="#">48</a>  | 631.8241 | 1261.6336 | 1261.6277 | 0.0059  | 1    | 13    | 7.3    | 1    | LYGSFNFRMK                                                      |
| b <a href="#">82</a>  | 864.4433 | 1726.8721 | 1726.8638 | 0.0083  | 1    | 13    | 5.8    | 1    | GLEWIGRIDPNDGGTK                                                |
| b <a href="#">104</a> | 737.7064 | 2210.0974 | 2210.0967 | 0.0007  | 0    | 12    | 2.8    | 1    | LGEHNINVLEGNEQFIDAAK                                            |
| b <a href="#">98</a>  | 737.7051 | 2210.0936 | 2210.0967 | -0.0032 | 0    | 11    | 3.6    | 1    | LGEHNINVLEGNEQFIDAAK                                            |
| b <a href="#">64</a>  | 769.3238 | 1536.6331 | 1536.6258 | 0.0072  | 1    | 11    | 1.2    | 1    | MVSSGMYKMDNGK + Acetyl (Protein N-term); 3 Oxidation (M)        |
| b <a href="#">58</a>  | 710.8386 | 1419.6627 | 1419.6783 | -0.0155 | 1    | 11    | 7      | 1    | QNGGWEDGFYK + Acetyl (K)                                        |
| b <a href="#">105</a> | 738.0345 | 2211.0818 | 2211.0920 | -0.0102 | 0    | 11    | 3.9    | 1    | LGEHNINVLEGNEQFVNSAK                                            |
| b <a href="#">103</a> | 737.7064 | 2210.0973 | 2210.0967 | 0.0006  | 0    | 10    | 4.4    | 1    | LGEHNINVLEGNEQFIDAAK                                            |
| b <a href="#">83</a>  | 887.9523 | 1773.8900 | 1773.8819 | 0.0081  | 1    | 10    | 8.4    | 1    | KGDLLDAINSCTVTDK + 2 Acetyl (K)                                 |
| b <a href="#">27</a>  | 505.2693 | 1008.5241 | 1008.5170 | 0.0071  | 0    | 10    | 14     | 1    | MVGTVIMMK                                                       |
| b <a href="#">25</a>  | 478.2537 | 954.4928  | 954.5062  | -0.0134 | 0    | 10    | 12     | 1    | ILTFEYK + Acetyl (K)                                            |
| b <a href="#">55</a>  | 696.8427 | 1391.6709 | 1391.6767 | -0.0057 | 1    | 9     | 14     | 1    | TQRSQHSQHR                                                      |
| b <a href="#">131</a> | 767.3872 | 2299.1397 | 2299.1513 | -0.0116 | 0    | 9     | 6.8    | 1    | NMQMSTIEILLTFELAK + Acetyl (K); 2 Oxidation (M)                 |
| b <a href="#">61</a>  | 712.8639 | 1423.7132 | 1423.7129 | 0.0003  | 1    | 9     | 13     | 1    | SMPSLDFSGRLSK                                                   |
| b <a href="#">89</a>  | 970.9707 | 1939.9268 | 1939.9172 | 0.0096  | 0    | 9     | 7.9    | 1    | MDQVMQFVPSQQFVK                                                 |
| b <a href="#">21</a>  | 448.7168 | 895.4190  | 895.4143  | 0.0047  | 1    | 9     | 15     | 1    | TMEKMEK                                                         |
| b <a href="#">36</a>  | 564.2791 | 1126.5436 | 1126.5328 | 0.0108  | 0    | 8     | 18     | 1    | LSSYSACVQK + Acetyl (K)                                         |
| b <a href="#">94</a>  | 732.0304 | 2193.0695 | 2193.0711 | -0.0016 | 0    | 8     | 7.9    | 1    | EMPVQFQVVELPSGHHLCK + Oxidation (M)                             |
| b <a href="#">72</a>  | 811.9081 | 1621.8017 | 1621.8208 | -0.0191 | 0    | 8     | 16     | 1    | GVYLEDIMPQGVAMK                                                 |
| b <a href="#">78</a>  | 837.3901 | 1672.7657 | 1672.7693 | -0.0036 | 0    | 7     | 10     | 1    | DSEGDTPSLINWPSR                                                 |

|   |                     |           |           |           |         |   |   |     |   |                                                   |
|---|---------------------|-----------|-----------|-----------|---------|---|---|-----|---|---------------------------------------------------|
| b | <a href="#">62</a>  | 752.8684  | 1503.7223 | 1503.7317 | -0.0094 | 1 | 7 | 21  | 1 | DGIQTKEHPNPGK + 2 Acetyl (K)                      |
| b | <a href="#">56</a>  | 701.3612  | 1400.7078 | 1400.7048 | 0.0030  | 0 | 7 | 25  | 1 | VQDGHLLITTYGR + Acetyl (Protein N-term)           |
| b | <a href="#">119</a> | 1133.0131 | 2264.0116 | 2264.0300 | -0.0184 | 1 | 7 | 5.6 | 1 | ALMPSTEDAAAEVPSRDTMEK + Oxidation (M)             |
| b | <a href="#">60</a>  | 711.3410  | 1420.6675 | 1420.6722 | -0.0047 | 1 | 7 | 21  | 1 | SKDDSPSYLPTK + 2 Acetyl (K)                       |
| b | <a href="#">69</a>  | 790.8905  | 1579.7664 | 1579.7776 | -0.0112 | 1 | 6 | 25  | 1 | DRAYLEGACVQSLR                                    |
| b | <a href="#">106</a> | 738.0368  | 2211.0886 | 2211.0742 | 0.0143  | 1 | 6 | 11  | 1 | VESGFHQHGELSLRAMDK + Acetyl (K); Oxidation (M)    |
| b | <a href="#">19</a>  | 435.7739  | 869.5333  | 869.5222  | 0.0111  | 0 | 6 | 23  | 1 | DAIVLAVK + Acetyl (K)                             |
| b | <a href="#">133</a> | 767.3899  | 2299.1478 | 2299.1444 | 0.0034  | 0 | 6 | 15  | 1 | AVNDSGHLIAITGYDGNLGLGK                            |
| b | <a href="#">134</a> | 767.3904  | 2299.1494 | 2299.1513 | -0.0019 | 0 | 5 | 18  | 1 | NMQMMSIEILLTLFTELAK + Acetyl (K); 2 Oxidation (M) |
| b | <a href="#">128</a> | 762.7215  | 2285.1428 | 2285.1362 | 0.0066  | 0 | 4 | 20  | 1 | SATLMVYEDVVQIVSGFQGAR + Oxidation (M)             |
| b | <a href="#">108</a> | 738.0411  | 2211.1013 | 2211.0920 | 0.0093  | 0 | 4 | 20  | 1 | LGEHNINVLEGNEQFVNSAK                              |
| b | <a href="#">137</a> | 767.7184  | 2300.1334 | 2300.1156 | 0.0178  | 1 | 4 | 20  | 1 | ECYPKAMHCIFVGAQSLFLK + Oxidation (M)              |
| b | <a href="#">107</a> | 738.0407  | 2211.1002 | 2211.1101 | -0.0099 | 1 | 4 | 20  | 1 | SAPEIKYNSMVLICALMGSGK                             |
| b | <a href="#">96</a>  | 737.3625  | 2209.0657 | 2209.0586 | 0.0071  | 1 | 4 | 23  | 1 | GFMVQTGDPPTGTGRGSSSIWAK                           |
| b | <a href="#">65</a>  | 774.8665  | 1547.7185 | 1547.7225 | -0.0040 | 1 | 4 | 34  | 1 | KTAQGGHLCYNPML + Oxidation (M)                    |
| b | <a href="#">116</a> | 746.3798  | 2236.1176 | 2236.1020 | 0.0155  | 1 | 3 | 26  | 1 | SPKFCQFPQEIVLQMVVER + Acetyl (K); Oxidation (M)   |
| b | <a href="#">92</a>  | 1042.0088 | 2082.0030 | 2082.0164 | -0.0133 | 1 | 3 | 29  | 1 | RSPPLLAGAEEGMSQAPPEAR + Oxidation (M)             |
| b | <a href="#">77</a>  | 830.9302  | 1659.8459 | 1659.8329 | 0.0130  | 1 | 3 | 41  | 1 | KNVYSSQIGHQGSK                                    |
| b | <a href="#">5</a>   | 412.7528  | 823.4911  | 823.4803  | 0.0108  | 1 | 2 | 23  | 1 | KTPGLPK + 2 Acetyl (K)                            |
| b | <a href="#">118</a> | 563.2700  | 2249.0509 | 2249.0456 | 0.0052  | 1 | 2 | 29  | 1 | KHQELQAMQMLQSPYK + 2 Oxidation (M)                |
| b | <a href="#">124</a> | 762.0604  | 2283.1593 | 2283.1564 | 0.0029  | 0 | 2 | 27  | 1 | NMQMMSIEILLTLFTELAK + Acetyl (K); Oxidation (M)   |
| b | <a href="#">125</a> | 762.0604  | 2283.1594 | 2283.1529 | 0.0065  | 1 | 2 | 28  | 1 | AEEHLQRDVLSDLTNCTVK                               |
| b | <a href="#">136</a> | 767.7161  | 2300.1263 | 2300.1147 | 0.0116  | 1 | 2 | 35  | 1 | LTSYLVREVDVVFVSMGYHK + Acetyl (K)                 |
| b | <a href="#">86</a>  | 897.9106  | 1793.8066 | 1793.8036 | 0.0030  | 1 | 1 | 35  | 1 | KMAECLSESHAQSTTR + Oxidation (M)                  |
| b | <a href="#">139</a> | 772.3906  | 2314.1500 | 2314.1481 | 0.0018  | 1 | 1 | 38  | 1 | EPTFFGVSSKSNPGTVGIFSSK + Acetyl (K)               |
| b | <a href="#">91</a>  | 1033.0023 | 2063.9900 | 2063.9986 | -0.0085 | 1 | 1 | 44  | 1 | NAHDVLFMSYAEELKQAK + 2 Acetyl (K); Oxidation (M)  |
| b | <a href="#">79</a>  | 857.4072  | 1712.7998 | 1712.7981 | 0.0017  | 0 | 1 | 46  | 1 | FENDAAVMIQSWFR                                    |
| b | <a href="#">1</a>   | 384.2351  | 766.4556  |           |         |   |   |     |   |                                                   |
| b | <a href="#">2</a>   | 772.7244  | 771.7171  |           |         |   |   |     |   |                                                   |
| b | <a href="#">4</a>   | 406.2485  | 810.4824  |           |         |   |   |     |   |                                                   |
| b | <a href="#">6</a>   | 412.7538  | 823.4930  |           |         |   |   |     |   |                                                   |
| b | <a href="#">15</a>  | 428.2617  | 854.5088  |           |         |   |   |     |   |                                                   |
| b | <a href="#">22</a>  | 450.2746  | 898.5346  |           |         |   |   |     |   |                                                   |
| b | <a href="#">24</a>  | 472.2876  | 942.5607  |           |         |   |   |     |   |                                                   |
| b | <a href="#">38</a>  | 574.2686  | 1146.5227 |           |         |   |   |     |   |                                                   |
| b | <a href="#">39</a>  | 581.7801  | 1161.5457 |           |         |   |   |     |   |                                                   |
| b | <a href="#">75</a>  | 820.3959  | 1638.7773 |           |         |   |   |     |   |                                                   |
| b | <a href="#">84</a>  | 890.8921  | 1779.7696 |           |         |   |   |     |   |                                                   |
| b | <a href="#">87</a>  | 904.9432  | 1807.8718 |           |         |   |   |     |   |                                                   |
| b | <a href="#">90</a>  | 665.6227  | 1993.8461 |           |         |   |   |     |   |                                                   |
| b | <a href="#">93</a>  | 729.0349  | 2184.0828 |           |         |   |   |     |   |                                                   |
| b | <a href="#">95</a>  | 1104.0580 | 2206.1014 |           |         |   |   |     |   |                                                   |
| b | <a href="#">109</a> | 741.7061  | 2222.0964 |           |         |   |   |     |   |                                                   |
| b | <a href="#">110</a> | 742.0328  | 2223.0766 |           |         |   |   |     |   |                                                   |
| b | <a href="#">111</a> | 742.3769  | 2224.1090 |           |         |   |   |     |   |                                                   |
| b | <a href="#">112</a> | 742.3769  | 2224.1090 |           |         |   |   |     |   |                                                   |
| b | <a href="#">113</a> | 742.3774  | 2224.1104 |           |         |   |   |     |   |                                                   |
| b | <a href="#">114</a> | 742.7052  | 2225.0937 |           |         |   |   |     |   |                                                   |
| b | <a href="#">115</a> | 559.5206  | 2234.0535 |           |         |   |   |     |   |                                                   |
| b | <a href="#">117</a> | 747.0477  | 2238.1213 |           |         |   |   |     |   |                                                   |
| b | <a href="#">120</a> | 567.0126  | 2264.0211 |           |         |   |   |     |   |                                                   |
| b | <a href="#">121</a> | 567.2571  | 2264.9995 |           |         |   |   |     |   |                                                   |
| b | <a href="#">122</a> | 762.0545  | 2283.1416 |           |         |   |   |     |   |                                                   |
| b | <a href="#">123</a> | 762.0590  | 2283.1551 |           |         |   |   |     |   |                                                   |
| b | <a href="#">126</a> | 762.3839  | 2284.1300 |           |         |   |   |     |   |                                                   |
| b | <a href="#">127</a> | 762.3886  | 2284.1438 |           |         |   |   |     |   |                                                   |
| b | <a href="#">129</a> | 766.7296  | 2297.1669 |           |         |   |   |     |   |                                                   |
| b | <a href="#">130</a> | 766.7337  | 2297.1794 |           |         |   |   |     |   |                                                   |
| b | <a href="#">132</a> | 767.3895  | 2299.1466 |           |         |   |   |     |   |                                                   |
| b | <a href="#">135</a> | 767.3905  | 2299.1498 |           |         |   |   |     |   |                                                   |
| b | <a href="#">138</a> | 772.0624  | 2313.1653 |           |         |   |   |     |   |                                                   |
| b | <a href="#">140</a> | 585.5232  | 2338.0635 |           |         |   |   |     |   |                                                   |
| b | <a href="#">141</a> | 585.5268  | 2338.0780 |           |         |   |   |     |   |                                                   |
| b | <a href="#">142</a> | 589.5259  | 2354.0747 |           |         |   |   |     |   |                                                   |
| b | <a href="#">143</a> | 843.4239  | 2527.2499 |           |         |   |   |     |   |                                                   |

### Search Parameters

Type of search : MS/MS Ion Search  
 Enzyme : Trypsin/P  
 Variable modifications : Acetyl (K),Acetyl (Protein N-term),Oxidation (M)  
 Mass values : Monoisotopic  
 Protein Mass : Unrestricted  
 Peptide Mass Tolerance : ± 0.02 Da  
 Fragment Mass Tolerance: ± 0.3 Da  
 Max Missed Cleavages : 1  
 Instrument type : ESI-TRAP

Number of queries : 144

Mascot: <http://www.matrixscience.com/>

**MASCOT** **SCIENCE** Mascot Search Results

User : Bob  
 Email : rdenglis@utmb.edu  
 Search title : 11081916.raw #2298 phospho  
 MS data file : tempfile  
 Database : NCBI nr 20110707 (14481393 sequences; 4958963357 residues)  
 Taxonomy : Mus musculus (house mouse) (143921 sequences)  
 Timestamp : 24 Aug 2011 at 16:27:55 GMT  
 Protein hits : [gi|124248512](#) carbamoyl-phosphate synthase [ammonia], mitochondrial precursor [Mus musculus]  
                   [gi|51092303](#) Try10-like trypsinogen [Mus musculus]  
                   [gi|3093758](#) cyclic AMP specific phosphodiesterase PDE4D5A [Mus musculus]

NCBI nr [Decoy](#) False discovery rate

Peptide matches above identity threshold      28    1      3.57 %  
 Peptide matches above homology or identity threshold    30    3      10.00 %

**Probability Based Mowse Score**

Ions score is  $-10 \cdot \log(P)$ , where P is the probability that the observed match is a random event. Individual ions scores > 31 indicate identity or extensive homology ( $p < 0.05$ ). Protein scores are derived from ions scores as a non-probabilistic basis for ranking protein hits.

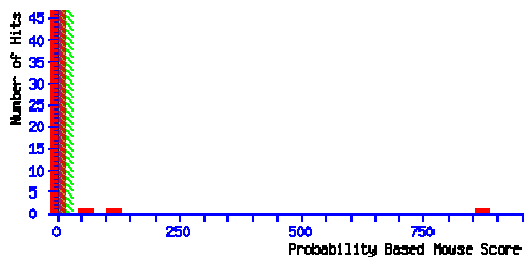

**Peptide Summary Report**

Format As   [Help](#)

Significance threshold  $p <$      Max. number of hits

Standard scoring     MudPIT scoring     Ions score or expect cut-off     Show sub-sets

Show pop-ups     Suppress pop-ups     Sort unassigned      Require bold red

            **Error tolerant**   

1. [gi|124248512](#)    Mass: 164514    Score: 870    Queries matched: 28    emPAI: 0.66  
 carbamoyl-phosphate synthase [ammonia], mitochondrial precursor [Mus musculus]  
 Check to include this hit in error tolerant search or archive report

| Query                | Observed | Mr (expt) | Mr (calc) | Delta   | Miss | Score | Expect   | Rank | Peptide                          |
|----------------------|----------|-----------|-----------|---------|------|-------|----------|------|----------------------------------|
| b <a href="#">3</a>  | 406.2211 | 810.4277  | 810.4276  | 0.0001  | 0    | 17    | 1.9      | 1    | R.SFFVSK.T                       |
| b <a href="#">23</a> | 453.2581 | 904.5017  | 904.5018  | -0.0001 | 0    | 54    | 0.00027  | 1    | K.LFAEAVQK.S                     |
| b <a href="#">26</a> | 495.2793 | 988.5440  | 988.5441  | -0.0000 | 0    | 45    | 0.012    | 1    | K.ETLIDLGTK.A                    |
| b <a href="#">28</a> | 508.2387 | 1014.4629 | 1014.4658 | -0.0029 | 0    | 35    | 0.042    | 1    | R.TFEESFQK.A                     |
| b <a href="#">29</a> | 508.8030 | 1015.5914 | 1015.5914 | -0.0000 | 0    | 45    | 0.0015   | 1    | K.GTTITSVLPK.P                   |
| b <a href="#">32</a> | 518.7715 | 1035.5284 | 1035.5237 | 0.0048  | 0    | 53    | 0.00061  | 1    | K.EIEYEVVR.D                     |
| b <a href="#">34</a> | 545.7982 | 1089.5819 | 1089.5819 | 0.0000  | 0    | 55    | 0.00029  | 1    | K.VPAIYVDTR.M                    |
| b <a href="#">35</a> | 551.8089 | 1101.6031 | 1101.6030 | 0.0002  | 0    | 40    | 0.0089   | 1    | K.QNLIAEVSTK.D                   |
| b <a href="#">37</a> | 568.7791 | 1135.5437 | 1135.5431 | 0.0006  | 0    | 60    | 0.00013  | 1    | K.VMIGESIDEK.R + Oxidation (M)   |
| b <a href="#">40</a> | 582.3737 | 1162.7329 | 1162.7325 | 0.0004  | 0    | 41    | 0.00026  | 1    | K.IALGIPLPEIK.N                  |
| b <a href="#">44</a> | 609.3116 | 1216.6087 | 1216.6088 | -0.0001 | 0    | 60    | 0.00012  | 1    | K.SLGQWLQEEK.V                   |
| b <a href="#">45</a> | 611.3386 | 1220.6626 | 1220.6652 | -0.0026 | 0    | 64    | 2.5e-005 | 1    | R.SIFSAVLDELK.V                  |
| b <a href="#">46</a> | 611.8452 | 1221.6758 | 1221.6757 | 0.0001  | 0    | 48    | 0.00075  | 1    | K.ATGYPLAFIAK.I                  |
| b <a href="#">47</a> | 623.8266 | 1245.6386 | 1245.6387 | -0.0001 | 0    | 58    | 0.00015  | 1    | K.IMGTSPLQIDR.A + Oxidation (M)  |
| b <a href="#">49</a> | 639.8508 | 1277.6870 | 1277.6867 | 0.0002  | 0    | 66    | 1.4e-005 | 1    | K.TLGVDFIDVATK.V                 |
| b <a href="#">50</a> | 649.8349 | 1297.6552 | 1297.6554 | -0.0002 | 0    | 55    | 0.00026  | 1    | K.LYFEELSLEK.I                   |
| b <a href="#">52</a> | 661.8428 | 1321.6710 | 1321.6700 | 0.0010  | 0    | 64    | 4.1e-005 | 1    | K.AADTIGYPVMIR.S + Oxidation (M) |
| b <a href="#">54</a> | 677.3659 | 1352.7172 | 1352.7160 | 0.0012  | 0    | 83    | 3.9e-007 | 1    | R.GQNQPVLNITNR.Q                 |
| b <a href="#">57</a> | 704.8664 | 1407.7183 | 1407.7180 | 0.0003  | 0    | 67    | 2.1e-005 | 1    | K.AFAMTNQILVER.S + Oxidation (M) |

|   |                     |          |           |           |         |   |     |          |   |                                      |
|---|---------------------|----------|-----------|-----------|---------|---|-----|----------|---|--------------------------------------|
| b | <a href="#">59</a>  | 710.8495 | 1419.6844 | 1419.6841 | 0.0003  | 0 | 85  | 3.1e-007 | 1 | K.GLNDSVTEETLR.K                     |
| b | <a href="#">63</a>  | 760.3750 | 1518.7354 | 1518.7348 | 0.0007  | 0 | 72  | 6e-006   | 1 | K.ALENNMSLDEIVR.L + Oxidation (M)    |
| b | <a href="#">68</a>  | 526.6110 | 1576.8112 | 1576.8096 | 0.0015  | 1 | 15  | 2.3      | 1 | R.QLFSDKLEINEK.I                     |
| b | <a href="#">70</a>  | 530.2754 | 1587.8043 | 1587.8045 | -0.0003 | 0 | 24  | 0.37     | 1 | R.FLGVAEQLEHNEGFK.L                  |
| b | <a href="#">73</a>  | 812.3985 | 1622.7825 | 1622.7822 | 0.0003  | 0 | 117 | 2.1e-010 | 1 | K.VLGTSVESIMATEDR.Q + Oxidation (M)  |
| b | <a href="#">74</a>  | 812.3997 | 1622.7848 | 1622.7861 | -0.0013 | 0 | 79  | 1.2e-006 | 1 | K.IAPSFVAVESMEDALK.A + Oxidation (M) |
| b | <a href="#">80</a>  | 862.4119 | 1722.8092 | 1722.8101 | -0.0009 | 0 | 74  | 3.9e-006 | 1 | K.IEFEGQSVDFVDPNK.Q                  |
| b | <a href="#">81</a>  | 863.9518 | 1725.8891 | 1725.8897 | -0.0006 | 0 | 70  | 5.9e-006 | 1 | R.DGSDILVINLPNNNTK.F                 |
| b | <a href="#">144</a> | 936.4748 | 2806.4025 | 2806.4025 | 0.0000  | 1 | 53  | 0.00015  | 1 | K.IEFEGQSVDFVDPNKQNLIAEVSTK.D        |

2. [gi|51092303](#) Mass: 26514 Score: 95 Queries matched: 2 emPAI: 0.25

Try10-like trypsinogen [Mus musculus]

ⓔ Check to include this hit in error tolerant search or archive report

| Query | Observed           | Mr(expt) | Mr(calc)  | Delta     | Miss    | Score | Expect | Rank     | Peptide |                                |
|-------|--------------------|----------|-----------|-----------|---------|-------|--------|----------|---------|--------------------------------|
| b     | <a href="#">41</a> | 588.3195 | 1174.6244 | 1174.6267 | -0.0024 | 0     | (49)   | 0.0011   | 1       | K.TLDNDIMLIK.L                 |
| b     | <a href="#">43</a> | 596.3178 | 1190.6211 | 1190.6217 | -0.0006 | 0     | 76     | 2.2e-006 | 1       | K.TLDNDIMLIK.L + Oxidation (M) |

Proteins matching the same set of peptides:

[gi|84781771](#) Mass: 26204 Score: 95 Queries matched: 2  
trypsin 10 [Mus musculus]

3. [gi|3093758](#) Mass: 23890 Score: 38 Queries matched: 1 emPAI: 0.13

cyclic AMP specific phosphodiesterase PDE4D5A [Mus musculus]

ⓔ Check to include this hit in error tolerant search or archive report

| Query | Observed           | Mr(expt) | Mr(calc) | Delta    | Miss    | Score | Expect | Rank   | Peptide |              |
|-------|--------------------|----------|----------|----------|---------|-------|--------|--------|---------|--------------|
| b     | <a href="#">18</a> | 434.7655 | 867.5164 | 867.5178 | -0.0014 | 0     | 38     | 0.0044 | 1       | K.LSPVISPR.N |

Proteins matching the same set of peptides:

[gi|148686495](#) Mass: 79441 Score: 38 Queries matched: 1  
phosphodiesterase 4D, cAMP specific, isoform CRA\_c [Mus musculus]

Peptide matches not assigned to protein hits: (no details means no match)

| Query | Observed            | Mr(expt) | Mr(calc)  | Delta     | Miss    | Score | Expect | Rank | Peptide |                                               |
|-------|---------------------|----------|-----------|-----------|---------|-------|--------|------|---------|-----------------------------------------------|
| b     | <a href="#">8</a>   | 421.7574 | 841.5002  | 841.4810  | 0.0192  | 0     | 30     | 0.06 | 1       | LGTWLPR                                       |
| b     | <a href="#">7</a>   | 421.7572 | 841.4998  | 841.4810  | 0.0188  | 0     | 30     | 0.07 | 1       | LGTWLPR                                       |
| b     | <a href="#">100</a> | 737.7061 | 2210.0964 | 2210.0967 | -0.0003 | 0     | 22     | 0.4  | 1       | LGEHNINVLEGNEQFIDAAK                          |
| b     | <a href="#">17</a>  | 428.7655 | 855.5165  | 855.5112  | 0.0052  | 1     | 21     | 0.43 | 1       | ALRMLPR                                       |
| b     | <a href="#">99</a>  | 737.7060 | 2210.0961 | 2210.0967 | -0.0006 | 0     | 21     | 0.46 | 1       | LGEHNINVLEGNEQFIDAAK                          |
| b     | <a href="#">97</a>  | 737.7046 | 2210.0919 | 2210.0967 | -0.0048 | 0     | 21     | 0.47 | 1       | LGEHNINVLEGNEQFIDAAK                          |
| b     | <a href="#">102</a> | 737.7062 | 2210.0969 | 2210.0967 | 0.0001  | 0     | 20     | 0.58 | 1       | LGEHNINVLEGNEQFIDAAK                          |
| b     | <a href="#">25</a>  | 478.2537 | 954.4928  | 954.4787  | 0.0141  | 1     | 19     | 0.96 | 1       | LLSAKDTK + Phospho (ST)                       |
| b     | <a href="#">33</a>  | 536.3241 | 1070.6337 | 1070.6196 | 0.0141  | 1     | 18     | 0.56 | 1       | DLQLRVTR                                      |
| b     | <a href="#">66</a>  | 780.8984 | 1559.7822 | 1559.7654 | 0.0168  | 0     | 18     | 1.5  | 1       | QWGLLCDLLEQDK                                 |
| b     | <a href="#">12</a>  | 421.7584 | 841.5023  | 841.5021  | 0.0002  | 1     | 18     | 1.1  | 1       | LKESLPR                                       |
| b     | <a href="#">16</a>  | 428.7649 | 855.5153  | 855.5178  | -0.0025 | 0     | 17     | 1.1  | 1       | EAALIALR                                      |
| b     | <a href="#">101</a> | 737.7061 | 2210.0965 | 2210.0967 | -0.0002 | 0     | 16     | 1.3  | 1       | LGEHNINVLEGNEQFIDAAK                          |
| b     | <a href="#">42</a>  | 595.3272 | 1188.6399 | 1188.6462 | -0.0063 | 1     | 16     | 1.7  | 1       | ITDTISDRLR                                    |
| b     | <a href="#">10</a>  | 421.7583 | 841.5021  | 841.5134  | -0.0113 | 1     | 16     | 1.5  | 1       | LGLRLDR                                       |
| b     | <a href="#">76</a>  | 820.3979 | 1638.7812 | 1638.7745 | 0.0067  | 1     | 15     | 2.5  | 1       | IQMEEKFMAANPSK + Oxidation (M)                |
| b     | <a href="#">13</a>  | 421.7586 | 841.5025  | 841.5021  | 0.0004  | 0     | 15     | 1.9  | 1       | LSVALSPR                                      |
| b     | <a href="#">14</a>  | 427.7583 | 853.5020  | 853.5021  | -0.0001 | 0     | 15     | 1.4  | 1       | VQLELPR                                       |
| b     | <a href="#">71</a>  | 804.9005 | 1607.7865 | 1607.7825 | 0.0041  | 1     | 15     | 3.2  | 1       | QKCQDETQTISLK                                 |
| b     | <a href="#">61</a>  | 712.8639 | 1423.7132 | 1423.7072 | 0.0061  | 1     | 15     | 3    | 1       | AENSSLNLIGKAK + Phospho (ST)                  |
| b     | <a href="#">11</a>  | 421.7584 | 841.5022  | 841.5021  | 0.0001  | 1     | 14     | 2.5  | 1       | ITKPLDR                                       |
| b     | <a href="#">30</a>  | 510.7715 | 1019.5285 | 1019.5182 | 0.0103  | 1     | 14     | 4.6  | 1       | MRDLGVASR + Oxidation (M)                     |
| b     | <a href="#">9</a>   | 421.7582 | 841.5019  | 841.5021  | -0.0002 | 0     | 13     | 2.9  | 1       | LSVALSPR                                      |
| b     | <a href="#">21</a>  | 448.7168 | 895.4190  | 895.4164  | 0.0025  | 0     | 13     | 6.7  | 1       | LGTTTAPR + Phospho (ST)                       |
| b     | <a href="#">53</a>  | 673.8529 | 1345.6913 | 1345.6941 | -0.0028 | 1     | 13     | 4.2  | 1       | MAAPLRHTLLK + Oxidation (M); Phospho (ST)     |
| b     | <a href="#">48</a>  | 631.8241 | 1261.6336 | 1261.6277 | 0.0059  | 1     | 13     | 5.2  | 1       | LYGSFNFRMK                                    |
| b     | <a href="#">82</a>  | 864.4433 | 1726.8721 | 1726.8638 | 0.0083  | 1     | 13     | 4.1  | 1       | GLEWIGRIDPNDGGTK                              |
| b     | <a href="#">104</a> | 737.7064 | 2210.0974 | 2210.0967 | 0.0007  | 0     | 12     | 3.4  | 1       | LGEHNINVLEGNEQFIDAAK                          |
| b     | <a href="#">67</a>  | 783.8735 | 1565.7324 | 1565.7169 | 0.0155  | 1     | 12     | 7.4  | 1       | VSETSGGKTSGEDANK                              |
| b     | <a href="#">78</a>  | 837.3901 | 1672.7657 | 1672.7604 | 0.0053  | 1     | 12     | 7.6  | 1       | MGNSTSGQTVRQALK + Oxidation (M); Phospho (ST) |
| b     | <a href="#">98</a>  | 737.7051 | 2210.0936 | 2210.0967 | -0.0032 | 0     | 11     | 4.1  | 1       | LGEHNINVLEGNEQFIDAAK                          |
| b     | <a href="#">55</a>  | 696.8427 | 1391.6709 | 1391.6671 | 0.0039  | 1     | 11     | 8.3  | 1       | SSGGAARGAVPAVGR + Phospho (ST)                |



|   |                     |           |           |           |         |   |    |     |   |                                                                  |
|---|---------------------|-----------|-----------|-----------|---------|---|----|-----|---|------------------------------------------------------------------|
| b | <a href="#">105</a> | 738.0345  | 2211.0818 | 2211.0920 | -0.0102 | 0 | 11 | 4.9 | 1 | LGEHNINVLGNEQFVNSAK                                              |
| b | <a href="#">79</a>  | 857.4072  | 1712.7998 | 1712.8056 | -0.0058 | 1 | 11 | 8.2 | 1 | TSDPLKILANADTMK + Oxidation (M); Phospho (ST)                    |
| b | <a href="#">103</a> | 737.7064  | 2210.0973 | 2210.0967 | 0.0006  | 0 | 10 | 5.4 | 1 | LGEHNINVLGNEQFIDAAK                                              |
| b | <a href="#">27</a>  | 505.2693  | 1008.5241 | 1008.5170 | 0.0071  | 0 | 10 | 12  | 1 | MVGTVIMMK                                                        |
| b | <a href="#">56</a>  | 701.3612  | 1400.7078 | 1400.6887 | 0.0191  | 1 | 10 | 11  | 1 | LSFCEKNVILR + Phospho (ST)                                       |
| b | <a href="#">125</a> | 762.0604  | 2283.1594 | 2283.1399 | 0.0195  | 1 | 9  | 5.3 | 1 | EPPGKPKGAEALSITPQLLK + Phospho (ST)                              |
| b | <a href="#">36</a>  | 564.2791  | 1126.5436 | 1126.5424 | 0.0012  | 0 | 9  | 15  | 1 | LIGSHPDVLP + Phospho (ST)                                        |
| b | <a href="#">134</a> | 767.3904  | 2299.1494 | 2299.1501 | -0.0007 | 1 | 9  | 6.1 | 1 | AKFDGIFESLLPVNGLLSGDK + Phospho (ST)                             |
| b | <a href="#">62</a>  | 752.8684  | 1503.7223 | 1503.7275 | -0.0052 | 1 | 9  | 15  | 1 | FFKEIWSAAAR + Phospho (ST)                                       |
| b | <a href="#">89</a>  | 970.9707  | 1939.9268 | 1939.9172 | 0.0096  | 0 | 9  | 11  | 1 | MDQVMQFVPEPSQQFVK                                                |
| b | <a href="#">58</a>  | 710.8386  | 1419.6627 | 1419.6799 | -0.0172 | 0 | 8  | 16  | 1 | FIASFNVVNTTK + Phospho (ST)                                      |
| b | <a href="#">86</a>  | 897.9106  | 1793.8066 | 1793.8059 | 0.0007  | 1 | 8  | 14  | 1 | EFLGTTQTASFCGPKK + Phospho (ST)                                  |
| b | <a href="#">92</a>  | 1042.0088 | 2082.0030 | 2082.0009 | 0.0021  | 1 | 8  | 11  | 1 | FASLFNVKDOIVMFLSR + Phospho (ST)                                 |
| b | <a href="#">94</a>  | 732.0304  | 2193.0695 | 2193.0711 | -0.0016 | 0 | 8  | 10  | 1 | EMPVQFQVVELPSGHHLCK + Oxidation (M)                              |
| b | <a href="#">72</a>  | 811.9081  | 1621.8017 | 1621.8208 | -0.0191 | 0 | 8  | 17  | 1 | GVYLTDIMPQGVAMK                                                  |
| b | <a href="#">85</a>  | 894.9596  | 1787.9046 | 1787.9087 | -0.0041 | 1 | 7  | 13  | 1 | ANQQLEKDLNLMEDIK + Oxidation (M)                                 |
| b | <a href="#">119</a> | 1133.0131 | 2264.0116 | 2264.0300 | -0.0184 | 1 | 7  | 19  | 1 | ALMPSTEDAAAEVPSRDTMEK + Oxidation (M)                            |
| b | <a href="#">114</a> | 742.7052  | 2225.0937 | 2225.0970 | -0.0033 | 1 | 7  | 13  | 1 | SVIQRQ <sup>3</sup> SALGPIISVTP <sup>3</sup> GR + 2 Phospho (ST) |
| b | <a href="#">75</a>  | 820.3959  | 1638.7773 | 1638.7800 | -0.0027 | 1 | 7  | 18  | 1 | QQLASKSTIL <sup>3</sup> C <sup>3</sup> SHK + Phospho (ST)        |
| b | <a href="#">69</a>  | 790.8905  | 1579.7664 | 1579.7776 | -0.0112 | 1 | 6  | 25  | 1 | DRAYLEGACVQSLR                                                   |
| b | <a href="#">77</a>  | 830.9302  | 1659.8459 | 1659.8307 | 0.0152  | 1 | 6  | 16  | 1 | IAMSSAKVVIVYGDK + Phospho (ST)                                   |
| b | <a href="#">133</a> | 767.3899  | 2299.1478 | 2299.1444 | 0.0034  | 0 | 6  | 13  | 1 | AVNDSGHLIAITGYDGNLGDLGK                                          |
| b | <a href="#">60</a>  | 711.3410  | 1420.6675 | 1420.6729 | -0.0054 | 1 | 6  | 29  | 1 | ATISCRASENVDR                                                    |
| b | <a href="#">51</a>  | 655.3228  | 1308.6309 | 1308.6198 | 0.0112  | 0 | 5  | 37  | 1 | VGDTGDFSVDLGK                                                    |
| b | <a href="#">117</a> | 747.0477  | 2238.1213 | 2238.1158 | 0.0055  | 0 | 5  | 14  | 1 | DTHSLPPAQILGIQSGQGIAR + Phospho (ST)                             |
| b | <a href="#">83</a>  | 887.9523  | 1773.8900 | 1773.8848 | 0.0052  | 1 | 5  | 26  | 1 | AAML <sup>3</sup> SLLRYNANLTK + Oxidation (M); Phospho (ST)      |
| b | <a href="#">20</a>  | 435.7759  | 869.5372  | 869.5487  | -0.0115 | 0 | 4  | 14  | 1 | LWVALLR                                                          |
| b | <a href="#">19</a>  | 435.7739  | 869.5333  | 869.5487  | -0.0154 | 0 | 4  | 15  | 1 | LWVALLR                                                          |
| b | <a href="#">128</a> | 762.7215  | 2285.1428 | 2285.1362 | 0.0066  | 0 | 4  | 18  | 1 | SATLMVYEDVVQIVSGFQGAR + Oxidation (M)                            |
| b | <a href="#">108</a> | 738.0411  | 2211.1013 | 2211.0920 | 0.0093  | 0 | 4  | 25  | 1 | LGEHNINVLGNEQFVNSAK                                              |
| b | <a href="#">137</a> | 767.7184  | 2300.1334 | 2300.1156 | 0.0178  | 1 | 4  | 19  | 1 | ECYPKAMHCIFVGAQSLFLK + Oxidation (M)                             |
| b | <a href="#">107</a> | 738.0407  | 2211.1002 | 2211.1101 | -0.0099 | 1 | 4  | 26  | 1 | SAPEIKYNSMVLICALMGSGK                                            |
| b | <a href="#">96</a>  | 737.3625  | 2209.0657 | 2209.0586 | 0.0071  | 1 | 4  | 30  | 1 | GFMVQTGDPTGTGRGGSSIWAK                                           |
| b | <a href="#">65</a>  | 774.8665  | 1547.7185 | 1547.7225 | -0.0040 | 1 | 4  | 49  | 1 | KTAQGGHLCYNPML + Oxidation (M)                                   |
| b | <a href="#">31</a>  | 512.2410  | 1022.4674 | 1022.4516 | 0.0158  | 0 | 4  | 40  | 1 | SQSTSEQEK                                                        |
| b | <a href="#">93</a>  | 729.0349  | 2184.0828 | 2184.0690 | 0.0138  | 0 | 3  | 26  | 1 | MTGLES <sup>3</sup> LWVSEVLQLPFR + Phospho (ST)                  |
| b | <a href="#">106</a> | 738.0368  | 2211.0886 | 2211.1027 | -0.0142 | 1 | 3  | 29  | 1 | MLPSSMNSVEVYSGANRILK + Oxidation (M)                             |
| b | <a href="#">118</a> | 563.2700  | 2249.0509 | 2249.0456 | 0.0052  | 1 | 2  | 49  | 1 | KHQLQAMQ <sup>3</sup> MELQSPEYK + 2 Oxidation (M)                |
| b | <a href="#">88</a>  | 961.9653  | 1921.9160 | 1921.8985 | 0.0176  | 1 | 2  | 55  | 1 | NLMAKVIQIATSSSTAK + 2 Phospho (ST)                               |
| b | <a href="#">64</a>  | 769.3238  | 1536.6331 | 1536.6449 | -0.0118 | 1 | 2  | 70  | 1 | KHSLSSMTYVPK + Phospho (ST); Phospho (Y)                         |
| b | <a href="#">115</a> | 559.5206  | 2234.0535 | 2234.0409 | 0.0126  | 1 | 2  | 50  | 1 | YRLVPYGNH <sup>3</sup> YLES <sup>3</sup> LDK + Phospho (ST)      |
| b | <a href="#">124</a> | 762.0604  | 2283.1593 | 2283.1399 | 0.0194  | 1 | 1  | 34  | 1 | EPPGKPKGAEALSITPQLLK + Phospho (ST)                              |
| b | <a href="#">39</a>  | 581.7801  | 1161.5457 | 1161.5505 | -0.0048 | 1 | 1  | 93  | 1 | SEIFLKM <sup>3</sup> SK + Phospho (ST)                           |
| b | <a href="#">132</a> | 767.3895  | 2299.1466 | 2299.1501 | -0.0035 | 1 | 0  | 46  | 1 | AKFDGIFESLLPVNGLLSGDK + Phospho (ST)                             |
| b | <a href="#">1</a>   | 384.2351  | 766.4556  |           |         |   |    |     |   |                                                                  |
| b | <a href="#">2</a>   | 772.7244  | 771.7171  |           |         |   |    |     |   |                                                                  |
| b | <a href="#">4</a>   | 406.2485  | 810.4824  |           |         |   |    |     |   |                                                                  |
| b | <a href="#">5</a>   | 412.7528  | 823.4911  |           |         |   |    |     |   |                                                                  |
| b | <a href="#">6</a>   | 412.7538  | 823.4930  |           |         |   |    |     |   |                                                                  |
| b | <a href="#">15</a>  | 428.2617  | 854.5088  |           |         |   |    |     |   |                                                                  |
| b | <a href="#">22</a>  | 450.2746  | 898.5346  |           |         |   |    |     |   |                                                                  |
| b | <a href="#">24</a>  | 472.2876  | 942.5607  |           |         |   |    |     |   |                                                                  |
| b | <a href="#">38</a>  | 574.2686  | 1146.5227 |           |         |   |    |     |   |                                                                  |
| b | <a href="#">84</a>  | 890.8921  | 1779.7696 |           |         |   |    |     |   |                                                                  |
| b | <a href="#">87</a>  | 904.9432  | 1807.8718 |           |         |   |    |     |   |                                                                  |
| b | <a href="#">90</a>  | 665.6227  | 1993.8461 |           |         |   |    |     |   |                                                                  |
| b | <a href="#">91</a>  | 1033.0023 | 2063.9900 |           |         |   |    |     |   |                                                                  |
| b | <a href="#">95</a>  | 1104.0580 | 2206.1014 |           |         |   |    |     |   |                                                                  |
| b | <a href="#">109</a> | 741.7061  | 2222.0964 |           |         |   |    |     |   |                                                                  |
| b | <a href="#">110</a> | 742.0328  | 2223.0766 |           |         |   |    |     |   |                                                                  |
| b | <a href="#">111</a> | 742.3769  | 2224.1090 |           |         |   |    |     |   |                                                                  |
| b | <a href="#">112</a> | 742.3769  | 2224.1090 |           |         |   |    |     |   |                                                                  |
| b | <a href="#">113</a> | 742.3774  | 2224.1104 |           |         |   |    |     |   |                                                                  |
| b | <a href="#">116</a> | 746.3798  | 2236.1176 |           |         |   |    |     |   |                                                                  |
| b | <a href="#">120</a> | 567.0126  | 2264.0211 |           |         |   |    |     |   |                                                                  |
| b | <a href="#">121</a> | 567.2571  | 2264.9995 |           |         |   |    |     |   |                                                                  |
| b | <a href="#">122</a> | 762.0545  | 2283.1416 |           |         |   |    |     |   |                                                                  |
| b | <a href="#">123</a> | 762.0590  | 2283.1551 |           |         |   |    |     |   |                                                                  |

|   |                     |          |           |
|---|---------------------|----------|-----------|
| b | <a href="#">126</a> | 762.3839 | 2284.1300 |
| b | <a href="#">127</a> | 762.3886 | 2284.1438 |
| b | <a href="#">129</a> | 766.7296 | 2297.1669 |
| b | <a href="#">130</a> | 766.7337 | 2297.1794 |
| b | <a href="#">131</a> | 767.3872 | 2299.1397 |
| b | <a href="#">135</a> | 767.3905 | 2299.1498 |
| b | <a href="#">136</a> | 767.7161 | 2300.1263 |
| b | <a href="#">138</a> | 772.0624 | 2313.1653 |
| b | <a href="#">139</a> | 772.3906 | 2314.1500 |
| b | <a href="#">140</a> | 585.5232 | 2338.0635 |
| b | <a href="#">141</a> | 585.5268 | 2338.0780 |
| b | <a href="#">142</a> | 589.5259 | 2354.0747 |
| b | <a href="#">143</a> | 843.4239 | 2527.2499 |

---

### Search Parameters

Type of search : MS/MS Ion Search  
Enzyme : Trypsin/P  
Variable modifications : Oxidation (M),Phospho (ST),Phospho (Y)  
Mass values : Monoisotopic  
Protein Mass : Unrestricted  
Peptide Mass Tolerance :  $\pm 0.02$  Da  
Fragment Mass Tolerance:  $\pm 0.3$  Da  
Max Missed Cleavages : 1  
Instrument type : ESI-TRAP  
Number of queries : 144

Mascot: <http://www.matrixscience.com/>

**MASCOT** Mascot Search Results

User : Bob  
 Email : rdenglis@utmb.edu  
 Search title : 11081917.raw #2303 acetylation  
 MS data file : tempfile  
 Database : NCBI nr 20110707 (14481393 sequences; 4958963357 residues)  
 Taxonomy : Mus musculus (house mouse) (143921 sequences)  
 Timestamp : 24 Aug 2011 at 16:33:40 GMT  
 Protein hits : [gi|124248512](#) carbamoyl-phosphate synthase [ammonia], mitochondrial precursor [Mus musculus]  
[gi|200246](#) pyruvate carboxylase [Mus musculus]  
[gi|84781771](#) trypsin 10 [Mus musculus]  
[gi|3093758](#) cyclic AMP specific phosphodiesterase PDE4D5A [Mus musculus]  
[gi|148677260](#) mCG126205 [Mus musculus]

NCBI nr **Decoy** False discovery rate

Peptide matches above identity threshold 32 1 3.13 %  
 Peptide matches above homology or identity threshold 35 1 2.86 %

**Probability Based Mowse Score**

Ions score is  $-10 \cdot \log(P)$ , where P is the probability that the observed match is a random event. Individual ions scores > 32 indicate identity or extensive homology (p<0.05). Protein scores are derived from ions scores as a non-probabilistic basis for ranking protein hits.

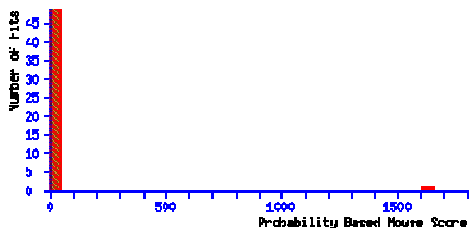

**Peptide Summary Report**

Format As  [Help](#)

Significance threshold p<  Max. number of hits

Standard scoring  MudPIT scoring  Ions score or expect cut-off  Show sub-sets

Show pop-ups  Suppress pop-ups  Sort unassigned   Require bold red

Error tolerant

1. [gi|124248512](#) Mass: 164514 Score: 1631 Queries matched: 31 emPAI: 0.66  
 carbamoyl-phosphate synthase [ammonia], mitochondrial precursor [Mus musculus]  
 Check to include this hit in error tolerant search or archive report

| Query                | Observed | Mr (expt) | Mr (calc) | Delta   | Miss | Score | Expect   | Rank | Peptide                             |
|----------------------|----------|-----------|-----------|---------|------|-------|----------|------|-------------------------------------|
| b <a href="#">3</a>  | 406.2214 | 810.4282  | 810.4276  | 0.0007  | 0    | 25    | 0.41     | 1    | R.SFPFVSK.T                         |
| b <a href="#">4</a>  | 406.2214 | 810.4283  | 810.4276  | 0.0007  | 0    | (18)  | 2.5      | 1    | R.SFPFVSK.T                         |
| b <a href="#">19</a> | 453.2583 | 904.5021  | 904.5018  | 0.0003  | 0    | 43    | 0.0059   | 1    | K.LFAEAVQK.S                        |
| b <a href="#">20</a> | 495.2797 | 988.5447  | 988.5441  | 0.0007  | 0    | 51    | 0.0033   | 1    | K.ETLIDLGTK.A                       |
| b <a href="#">22</a> | 508.2393 | 1014.4641 | 1014.4658 | -0.0017 | 0    | 34    | 0.024    | 1    | R.TFEESFQK.A                        |
| b <a href="#">23</a> | 508.8030 | 1015.5914 | 1015.5914 | -0.0000 | 0    | 38    | 0.012    | 1    | K.GTTTISVLPK.P                      |
| b <a href="#">25</a> | 518.7691 | 1035.5237 | 1035.5237 | 0.0000  | 0    | 38    | 0.024    | 1    | K.EIEYEVVR.D                        |
| b <a href="#">27</a> | 545.7980 | 1089.5815 | 1089.5819 | -0.0004 | 0    | 46    | 0.0037   | 1    | K.VPAIYGDVTR.M                      |
| b <a href="#">28</a> | 551.8086 | 1101.6027 | 1101.6030 | -0.0002 | 0    | 38    | 0.025    | 1    | K.QNLIAEVSTK.D                      |
| b <a href="#">30</a> | 568.7799 | 1135.5453 | 1135.5431 | 0.0022  | 0    | 67    | 2.8e-005 | 1    | K.VMIGESIDEK.R + Oxidation (M)      |
| b <a href="#">31</a> | 582.3736 | 1162.7326 | 1162.7325 | 0.0001  | 0    | 44    | 0.00018  | 1    | K.IALGIPLPEIK.N                     |
| b <a href="#">35</a> | 609.3123 | 1216.6100 | 1216.6088 | 0.0012  | 0    | 58    | 0.00025  | 1    | K.SLQWLQEEK.V                       |
| b <a href="#">36</a> | 611.3392 | 1220.6638 | 1220.6652 | -0.0014 | 0    | 61    | 7.1e-005 | 1    | R.SIFSAVLDELK.V                     |
| b <a href="#">37</a> | 611.8458 | 1221.6770 | 1221.6757 | 0.0013  | 0    | 52    | 0.00052  | 1    | K.ATGYPLAFIAAK.I                    |
| b <a href="#">38</a> | 623.8301 | 1245.6455 | 1245.6387 | 0.0068  | 0    | 52    | 0.001    | 1    | K.IMGTSPLQIDR.A + Oxidation (M)     |
| b <a href="#">40</a> | 639.8509 | 1277.6872 | 1277.6867 | 0.0005  | 0    | 66    | 2.8e-005 | 1    | K.TLGVDFIDVATK.V                    |
| b <a href="#">41</a> | 649.8351 | 1297.6557 | 1297.6554 | 0.0003  | 0    | 59    | 0.00012  | 1    | K.LYFEELSLEK.I                      |
| b <a href="#">44</a> | 661.8426 | 1321.6706 | 1321.6700 | 0.0006  | 0    | 68    | 1.7e-005 | 1    | K.AADTIGYVPMIR.S + Oxidation (M)    |
| b <a href="#">47</a> | 677.3656 | 1352.7166 | 1352.7160 | 0.0006  | 0    | 66    | 2.6e-005 | 1    | R.GQNQPVLNITNR.Q                    |
| b <a href="#">50</a> | 704.8641 | 1407.7136 | 1407.7180 | -0.0044 | 0    | (63)  | 5.2e-005 | 1    | K.AFAMTNQILVER.S + Oxidation (M)    |
| b <a href="#">51</a> | 704.8666 | 1407.7186 | 1407.7180 | 0.0006  | 0    | 72    | 7.8e-006 | 1    | K.AFAMTNQILVER.S + Oxidation (M)    |
| b <a href="#">53</a> | 710.8513 | 1419.6880 | 1419.6841 | 0.0038  | 0    | 77    | 2.5e-006 | 1    | K.GLNSDSVTETELR.K                   |
| b <a href="#">56</a> | 760.3773 | 1518.7400 | 1518.7348 | 0.0053  | 0    | 72    | 6.8e-006 | 1    | K.ALENMNSLDEIVR.L + Oxidation (M)   |
| b <a href="#">62</a> | 526.6129 | 1576.8168 | 1576.8096 | 0.0071  | 1    | 30    | 0.091    | 1    | R.QLFSDKLNEINEK.I                   |
| b <a href="#">63</a> | 530.2755 | 1587.8046 | 1587.8045 | 0.0001  | 0    | 15    | 3.1      | 1    | R.FLGVAEQLHNEGFK.L                  |
| b <a href="#">66</a> | 812.3985 | 1622.7823 | 1622.7822 | 0.0002  | 0    | 92    | 5.2e-008 | 1    | K.VLGTSVESIMATEDR.Q + Oxidation (M) |

|   |     |           |           |           |         |   |    |          |   |                                         |
|---|-----|-----------|-----------|-----------|---------|---|----|----------|---|-----------------------------------------|
| b | 67  | 812.3998  | 1622.7851 | 1622.7861 | -0.0011 | 0 | 82 | 5.9e-007 | 1 | K.IAPSFVAVESMEDALK.A + Oxidation (M)    |
| b | 73  | 862.4122  | 1722.8098 | 1722.8101 | -0.0002 | 0 | 84 | 2.6e-007 | 1 | K.IEFEGQSVDFVDPNK.Q                     |
| b | 74  | 863.9523  | 1725.8899 | 1725.8897 | 0.0002  | 0 | 67 | 1.4e-005 | 1 | R.DGSIDLVINLPNNNTK.F                    |
| b | 83  | 1022.5412 | 2043.0678 | 2043.0670 | 0.0008  | 0 | 87 | 8.2e-008 | 1 | K.TVLMNPNIASVQTNEVGLK.Q + Oxidation (M) |
| b | 132 | 936.4751  | 2806.4034 | 2806.4025 | 0.0009  | 1 | 55 | 7.6e-005 | 1 | K.IEFEGQSVDFVDPNKQNLIAEVSTK.D           |

2. [gi|200246](#) Mass: 103041 Score: 63 Queries matched: 2 emPAI: 0.03  
 pyruvate carboxylase [Mus musculus]  
 e Check to include this hit in error tolerant search or archive report

| Query | Observed           | Mr(expt) | Mr(calc)  | Delta     | Miss    | Score | Expect | Rank    | Peptide |                                    |
|-------|--------------------|----------|-----------|-----------|---------|-------|--------|---------|---------|------------------------------------|
| b     | <a href="#">45</a> | 663.8489 | 1325.6833 | 1325.6827 | 0.0007  | 0     | 59     | 0.00013 | 1       | K.GTPLDTEVPLER.V                   |
|       | <a href="#">61</a> | 783.8738 | 1565.7331 | 1565.7429 | -0.0098 | 0     | 4      | 32      | 5       | K.METVVTSPMEGTIR.K + Oxidation (M) |

Proteins matching the same set of peptides:

- [gi|464506](#) Mass: 129602 Score: 63 Queries matched: 2  
 RecName: Full=Pyruvate carboxylase, mitochondrial; AltName: Full=Pyruvic carboxylase; Short=PCB; Flags: Precursor
- [gi|26346581](#) Mass: 90810 Score: 63 Queries matched: 2  
 unnamed protein product [Mus musculus]
- [gi|74186338](#) Mass: 129778 Score: 63 Queries matched: 2  
 unnamed protein product [Mus musculus]
- [gi|74201750](#) Mass: 129650 Score: 63 Queries matched: 2  
 unnamed protein product [Mus musculus]
- [gi|74215392](#) Mass: 129749 Score: 63 Queries matched: 2  
 unnamed protein product [Mus musculus]
- [gi|251823978](#) Mass: 129618 Score: 63 Queries matched: 2  
 pyruvate carboxylase, mitochondrial isoform 2 [Mus musculus]
- [gi|251823980](#) Mass: 129750 Score: 63 Queries matched: 2  
 pyruvate carboxylase, mitochondrial isoform 1 [Mus musculus]

3. [gi|84781771](#) Mass: 26204 Score: 63 Queries matched: 3 emPAI: 0.26  
 trypsin 10 [Mus musculus]  
 e Check to include this hit in error tolerant search or archive report

| Query | Observed           | Mr(expt) | Mr(calc)  | Delta     | Miss    | Score | Expect | Rank    | Peptide |                                |
|-------|--------------------|----------|-----------|-----------|---------|-------|--------|---------|---------|--------------------------------|
| b     | <a href="#">32</a> | 588.3186 | 1174.6227 | 1174.6267 | -0.0040 | 0     | (45)   | 0.0044  | 1       | K.TLDNDIMLIK.L                 |
| b     | <a href="#">34</a> | 596.3183 | 1190.6220 | 1190.6217 | 0.0003  | 0     | 58     | 0.00024 | 1       | K.TLDNDIMLIK.L + Oxidation (M) |
|       | <a href="#">42</a> | 655.3232 | 1308.6318 | 1308.6206 | 0.0112  | 0     | 5      | 38      | 5       | K.NMICVGFLEGCK.D + Acetyl (K)  |

4. [gi|3093758](#) Mass: 23890 Score: 35 Queries matched: 1 emPAI: 0.13  
 cyclic AMP specific phosphodiesterase PDE4D5A [Mus musculus]  
 e Check to include this hit in error tolerant search or archive report

| Query | Observed           | Mr(expt) | Mr(calc) | Delta    | Miss   | Score | Expect | Rank  | Peptide |              |
|-------|--------------------|----------|----------|----------|--------|-------|--------|-------|---------|--------------|
| b     | <a href="#">16</a> | 434.7667 | 867.5189 | 867.5178 | 0.0011 | 0     | 35     | 0.016 | 1       | K.LSPVISPR.N |

Proteins matching the same set of peptides:

- [gi|148686495](#) Mass: 79441 Score: 35 Queries matched: 1  
 phosphodiesterase 4D, cAMP specific, isoform CRA\_c [Mus musculus]

5. [gi|148677260](#) Mass: 227544 Score: 32 Queries matched: 2 emPAI: 0.01  
 mCG126205 [Mus musculus]  
 e Check to include this hit in error tolerant search or archive report

| Query | Observed           | Mr(expt) | Mr(calc)  | Delta     | Miss   | Score | Expect | Rank  | Peptide |                                   |
|-------|--------------------|----------|-----------|-----------|--------|-------|--------|-------|---------|-----------------------------------|
| b     | <a href="#">67</a> | 812.3998 | 1622.7851 | 1622.7796 | 0.0055 | 1     | (23)   | 0.45  | 2       | K.IQMEEFMAANPSK.I                 |
| b     | <a href="#">69</a> | 820.3981 | 1638.7817 | 1638.7745 | 0.0072 | 1     | 32     | 0.045 | 1       | K.IQMEEFMAANPSK.I + Oxidation (M) |

Proteins matching the same set of peptides:

- [gi|81906676](#) Mass: 227475 Score: 30 Queries matched: 2  
 RecName: Full=Sodium channel protein type 5 subunit alpha; AltName: Full=Sodium channel protein cardiac muscle subunit alpha; AltName:
- [gi|84875498](#) Mass: 227559 Score: 30 Queries matched: 2  
 sodium channel protein type 5 subunit alpha [Mus musculus]

Peptide matches not assigned to protein hits: (no details means no match)

| Query | Observed           | Mr(expt) | Mr(calc)  | Delta     | Miss    | Score | Expect | Rank | Peptide |                           |
|-------|--------------------|----------|-----------|-----------|---------|-------|--------|------|---------|---------------------------|
| b     | <a href="#">8</a>  | 421.7576 | 841.5007  | 841.4810  | 0.0197  | 0     | 30     | 0.17 | 1       | LGTWLPK                   |
| b     | <a href="#">10</a> | 421.7583 | 841.5021  | 841.5022  | -0.0001 | 1     | 27     | 0.29 | 1       | VKTTVPR + Acetyl (K)      |
| b     | <a href="#">9</a>  | 421.7578 | 841.5010  | 841.5021  | -0.0011 | 1     | 25     | 0.52 | 1       | VKTSLPR + Acetyl (K)      |
| b     | <a href="#">26</a> | 536.3244 | 1070.6342 | 1070.6196 | 0.0145  | 1     | 24     | 0.25 | 1       | DLQLRVTK                  |
| b     | <a href="#">12</a> | 421.7584 | 841.5023  | 841.5021  | 0.0002  | 1     | 23     | 0.73 | 1       | DGVIKLR + Acetyl (K)      |
| b     | <a href="#">13</a> | 421.7588 | 841.5030  | 841.5021  | 0.0008  | 1     | 23     | 0.76 | 1       | VKTSLPR + Acetyl (K)      |
| b     | <a href="#">15</a> | 428.7659 | 855.5172  | 855.5112  | 0.0059  | 1     | 23     | 0.56 | 1       | ALRMLPK                   |
| b     | <a href="#">61</a> | 783.8738 | 1565.7331 | 1565.7184 | 0.0147  | 1     | 23     | 0.42 | 1       | EKDPQGMLEYHK + Acetyl (K) |
| b     | <a href="#">43</a> | 655.8574 | 1309.7003 | 1309.6878 | 0.0126  | 1     | 22     | 0.54 | 1       | KGSALDPEPVK + Acetyl (K)  |

|   |                     |           |           |           |         |   |    |      |   |                                                                 |
|---|---------------------|-----------|-----------|-----------|---------|---|----|------|---|-----------------------------------------------------------------|
| b | <a href="#">11</a>  | 421.7584  | 841.5022  | 841.5022  | 0.0000  | 1 | 22 | 1    | 1 | VKTTVPR + Acetyl (K)                                            |
| b | <a href="#">97</a>  | 737.7067  | 2210.0982 | 2210.0967 | 0.0015  | 0 | 21 | 0.39 | 1 | LGEHNINVLEGNQFIDAAK                                             |
| b | <a href="#">46</a>  | 673.8527  | 1345.6909 | 1345.7089 | -0.0180 | 1 | 21 | 1.1  | 1 | GSLDQSLKDTLK + Acetyl (K)                                       |
| b | <a href="#">92</a>  | 737.7061  | 2210.0966 | 2210.0967 | -0.0001 | 0 | 19 | 0.59 | 1 | LGEHNINVLEGNQFIDAAK                                             |
| b | <a href="#">96</a>  | 737.7067  | 2210.0982 | 2210.0967 | 0.0014  | 0 | 19 | 0.65 | 1 | LGEHNINVLEGNQFIDAAK                                             |
| b | <a href="#">60</a>  | 780.8987  | 1559.7828 | 1559.7654 | 0.0174  | 0 | 19 | 1.6  | 1 | QWGLLCDLLEQDK                                                   |
| b | <a href="#">76</a>  | 864.4443  | 1726.8740 | 1726.8638 | 0.0102  | 1 | 17 | 1.9  | 1 | GLEWIGRIDPNDGGTK                                                |
| b | <a href="#">93</a>  | 737.7062  | 2210.0968 | 2210.0967 | 0.0001  | 0 | 17 | 0.95 | 1 | LGEHNINVLEGNQFIDAAK                                             |
| b | <a href="#">90</a>  | 737.7051  | 2210.0934 | 2210.0967 | -0.0033 | 0 | 17 | 1.1  | 1 | LGEHNINVLEGNQFIDAAK                                             |
| b | <a href="#">33</a>  | 595.3281  | 1188.6416 | 1188.6462 | -0.0046 | 1 | 16 | 2.9  | 1 | ITDTISDRLR                                                      |
| b | <a href="#">94</a>  | 737.7065  | 2210.0975 | 2210.0967 | 0.0008  | 0 | 16 | 1.1  | 1 | LGEHNINVLEGNQFIDAAK                                             |
| b | <a href="#">95</a>  | 737.7065  | 2210.0976 | 2210.0967 | 0.0009  | 0 | 16 | 1.2  | 1 | LGEHNINVLEGNQFIDAAK                                             |
| b | <a href="#">58</a>  | 769.3238  | 1536.6331 | 1536.6258 | 0.0073  | 1 | 15 | 0.48 | 1 | MVSSGMVKMDNGK + Acetyl (Protein N-term); 3 Oxidation (M)        |
| b | <a href="#">14</a>  | 428.7658  | 855.5171  | 855.5112  | 0.0059  | 1 | 15 | 3.6  | 1 | ALRMLPR                                                         |
| b | <a href="#">42</a>  | 655.3232  | 1308.6318 | 1308.6271 | 0.0047  | 0 | 15 | 3.6  | 1 | MLGLGLLYNK + Acetyl (K); Acetyl (Protein N-term); Oxidation (M) |
| b | <a href="#">39</a>  | 631.8241  | 1261.6336 | 1261.6159 | 0.0178  | 0 | 14 | 5.7  | 1 | GMTAEVGITMPR                                                    |
| b | <a href="#">24</a>  | 510.7720  | 1019.5293 | 1019.5321 | -0.0028 | 1 | 14 | 6.9  | 1 | VAKMTVSGK + 2 Acetyl (K); Oxidation (M)                         |
| b | <a href="#">64</a>  | 804.9007  | 1607.7868 | 1607.7825 | 0.0043  | 1 | 11 | 7.2  | 1 | QKCQDETQTISLTK                                                  |
| b | <a href="#">52</a>  | 710.8379  | 1419.6612 | 1419.6783 | -0.0170 | 1 | 10 | 8.1  | 1 | QNGWEDGFILK + Acetyl (K)                                        |
| b | <a href="#">21</a>  | 505.2696  | 1008.5247 | 1008.5170 | 0.0077  | 0 | 10 | 14   | 1 | MVGTIVIMMK                                                      |
| b | <a href="#">17</a>  | 435.7732  | 869.5319  | 869.5123  | 0.0196  | 0 | 9  | 11   | 1 | VSLWLPR                                                         |
| b | <a href="#">75</a>  | 864.4435  | 1726.8725 | 1726.8638 | 0.0086  | 1 | 9  | 14   | 1 | GLEWIGRIDPNDGGTK                                                |
| b | <a href="#">91</a>  | 737.7060  | 2210.0961 | 2210.0967 | -0.0006 | 0 | 9  | 6.7  | 1 | LGEHNINVLEGNQFIDAAK                                             |
| b | <a href="#">48</a>  | 696.8434  | 1391.6722 | 1391.6767 | -0.0045 | 1 | 9  | 17   | 1 | TQRSQHSQHR                                                      |
| b | <a href="#">99</a>  | 738.0352  | 2211.0838 | 2211.0639 | 0.0199  | 1 | 8  | 7.5  | 1 | MAMNAKQPFMHPVLQEPK + Acetyl (K); Oxidation (M)                  |
| b | <a href="#">54</a>  | 711.3414  | 1420.6682 | 1420.6722 | -0.0040 | 1 | 8  | 17   | 1 | SKDDSPSYLPTK + 2 Acetyl (K)                                     |
| b | <a href="#">55</a>  | 752.8687  | 1503.7228 | 1503.7317 | -0.0089 | 1 | 8  | 18   | 1 | DGIQTKEHPNPGK + 2 Acetyl (K)                                    |
| b | <a href="#">98</a>  | 738.0331  | 2211.0774 | 2211.0920 | -0.0146 | 0 | 7  | 11   | 1 | LGEHNINVLEGNQFVNSAK                                             |
| b | <a href="#">77</a>  | 887.9524  | 1773.8903 | 1773.8819 | 0.0084  | 1 | 7  | 19   | 1 | KGDLLDLAINSCVTVDK + 2 Acetyl (K)                                |
| b | <a href="#">71</a>  | 837.3913  | 1672.7681 | 1672.7693 | -0.0012 | 0 | 6  | 14   | 1 | DSEGDTPSLINWPSR                                                 |
| b | <a href="#">125</a> | 767.7175  | 2300.1307 | 2300.1147 | 0.0160  | 1 | 6  | 13   | 1 | LTSYLVREVDVFSVMGYHK + Acetyl (K)                                |
| b | <a href="#">72</a>  | 857.4080  | 1712.8014 | 1712.7981 | 0.0034  | 0 | 6  | 14   | 1 | FENDAAMVQSWFR                                                   |
| b | <a href="#">79</a>  | 897.9109  | 1793.8072 | 1793.8063 | 0.0010  | 0 | 6  | 13   | 1 | MQEGDLEMTLALEEK + Acetyl (K); Oxidation (M)                     |
| b | <a href="#">18</a>  | 435.7743  | 869.5340  | 869.5222  | 0.0118  | 0 | 6  | 25   | 1 | DAIVLAVK + Acetyl (K)                                           |
| b | <a href="#">81</a>  | 970.9710  | 1939.9274 | 1939.9172 | 0.0102  | 0 | 5  | 17   | 1 | MDQVMQFVPSQQFVK                                                 |
| b | <a href="#">49</a>  | 701.3616  | 1400.7086 | 1400.7048 | 0.0038  | 0 | 5  | 37   | 1 | VQDGHLLITTYGR + Acetyl (Protein N-term)                         |
| b | <a href="#">29</a>  | 564.2776  | 1126.5406 | 1126.5328 | 0.0078  | 0 | 5  | 28   | 1 | LSSSYACVQK + Acetyl (K)                                         |
| b | <a href="#">59</a>  | 774.8672  | 1547.7197 | 1547.7225 | -0.0027 | 1 | 5  | 24   | 1 | KTAQGGHLCYNPML + Oxidation (M)                                  |
| b | <a href="#">87</a>  | 732.0302  | 2193.0687 | 2193.0711 | -0.0023 | 0 | 5  | 15   | 1 | EMPVQFQVVELPSGHHLCK + Oxidation (M)                             |
| b | <a href="#">70</a>  | 830.9303  | 1659.8461 | 1659.8654 | -0.0193 | 1 | 4  | 33   | 1 | IQNTIGIKDPSPCFK                                                 |
| b | <a href="#">120</a> | 762.7159  | 2285.1258 | 2285.1362 | -0.0104 | 0 | 4  | 22   | 1 | SATLMVYEDVVQIVSGFQGAR + Oxidation (M)                           |
| b | <a href="#">103</a> | 742.0341  | 2223.0806 | 2223.0994 | -0.0188 | 0 | 4  | 24   | 1 | GIEFFMADLDALSPIHTPQR + Oxidation (M)                            |
| b | <a href="#">121</a> | 762.7219  | 2285.1438 | 2285.1362 | 0.0076  | 0 | 4  | 22   | 1 | SATLMVYEDVVQIVSGFQGAR + Oxidation (M)                           |
| b | <a href="#">57</a>  | 760.8666  | 1519.7187 | 1519.7197 | -0.0010 | 1 | 4  | 35   | 1 | VCAETHCSMLLKK + Acetyl (K); Oxidation (M)                       |
| b | <a href="#">85</a>  | 1042.0088 | 2082.0030 | 2082.0164 | -0.0133 | 1 | 3  | 30   | 1 | RSPPLLAGAEEGMSQAPPEAR + Oxidation (M)                           |
| b | <a href="#">65</a>  | 811.9087  | 1621.8029 | 1621.7909 | 0.0120  | 1 | 3  | 46   | 1 | KCLELFTLAEADK + 2 Acetyl (K)                                    |
| b | <a href="#">89</a>  | 737.3617  | 2209.0632 | 2209.0586 | 0.0045  | 1 | 3  | 31   | 1 | GFMVQTGDPFGTGRGSSIWAK                                           |
| b | <a href="#">100</a> | 738.0358  | 2211.0856 | 2211.1027 | -0.0171 | 1 | 2  | 27   | 1 | MLPSSMNSVEVYSGANRILK + Oxidation (M)                            |
| b | <a href="#">108</a> | 742.7061  | 2225.0964 | 2225.1116 | -0.0153 | 1 | 2  | 33   | 1 | QAKVWNTYELDLVNYQNK                                              |
| b | <a href="#">6</a>   | 412.7527  | 823.4908  | 823.4916  | -0.0008 | 1 | 2  | 28   | 1 | VASHIKK + Acetyl (K)                                            |
| b | <a href="#">86</a>  | 729.0353  | 2184.0840 | 2184.0741 | 0.0099  | 1 | 1  | 37   | 1 | ACIESRVNMVTASYITPAMK                                            |
| b | <a href="#">7</a>   | 412.7536  | 823.4926  | 823.4803  | 0.0123  | 1 | 1  | 30   | 1 | KTPGLPK + 2 Acetyl (K)                                          |
| b | <a href="#">127</a> | 767.7215  | 2300.1428 | 2300.1432 | -0.0004 | 1 | 1  | 38   | 1 | IITPMCSASGIVYKVFDTK + 2 Acetyl (K); Oxidation (M)               |
| b | <a href="#">112</a> | 747.0484  | 2238.1235 | 2238.1250 | -0.0016 | 1 | 1  | 38   | 1 | EVAMIFVNWKELIMCNK + Acetyl (K); Oxidation (M)                   |
| b | <a href="#">126</a> | 767.7196  | 2300.1370 | 2300.1228 | 0.0142  | 1 | 1  | 44   | 1 | YGRHPLMELPLMINFTGAR + 2 Oxidation (M)                           |
| b | <a href="#">131</a> | 589.2756  | 2353.0734 | 2353.0572 | 0.0161  | 0 | 0  | 28   | 1 | LEWMMGYISYDGTSTNPNPLK + Oxidation (M)                           |
| b | <a href="#">123</a> | 767.3908  | 2299.1505 | 2299.1557 | -0.0052 | 1 | 0  | 54   | 1 | TNGLQETNQRYPGLQEQVPK                                            |
| b | <a href="#">124</a> | 767.3909  | 2299.1510 | 2299.1513 | -0.0004 | 0 | 0  | 49   | 1 | NMQMMSIEILTLFTELAK + Acetyl (K); 2 Oxidation (M)                |
| b | <a href="#">117</a> | 567.5103  | 2266.0119 | 2266.0080 | 0.0039  | 1 | 0  | 27   | 1 | HQREGMGGGAAPQCAGAGTR + Oxidation (M)                            |
| b | <a href="#">1</a>   | 384.2357  | 766.4568  |           |         |   |    |      |   |                                                                 |
| b | <a href="#">2</a>   | 772.3971  | 771.3899  |           |         |   |    |      |   |                                                                 |
| b | <a href="#">5</a>   | 406.2483  | 810.4821  |           |         |   |    |      |   |                                                                 |
| b | <a href="#">68</a>  | 820.3962  | 1638.7779 |           |         |   |    |      |   |                                                                 |
| b | <a href="#">78</a>  | 890.8915  | 1779.7685 |           |         |   |    |      |   |                                                                 |
| b | <a href="#">80</a>  | 904.9436  | 1807.8726 |           |         |   |    |      |   |                                                                 |
| b | <a href="#">82</a>  | 665.6230  | 1993.8471 |           |         |   |    |      |   |                                                                 |
| b | <a href="#">84</a>  | 1033.0019 | 2063.9892 |           |         |   |    |      |   |                                                                 |
| b | <a href="#">88</a>  | 1104.0584 | 2206.1022 |           |         |   |    |      |   |                                                                 |
| b | <a href="#">101</a> | 738.0408  | 2211.1006 |           |         |   |    |      |   |                                                                 |
| b | <a href="#">102</a> | 738.0412  | 2211.1018 |           |         |   |    |      |   |                                                                 |
| b | <a href="#">104</a> | 742.3763  | 2224.1071 |           |         |   |    |      |   |                                                                 |
| b | <a href="#">105</a> | 742.3773  | 2224.1101 |           |         |   |    |      |   |                                                                 |
| b | <a href="#">106</a> | 742.3773  | 2224.1101 |           |         |   |    |      |   |                                                                 |
| b | <a href="#">107</a> | 742.7051  | 2225.0934 |           |         |   |    |      |   |                                                                 |
| b | <a href="#">109</a> | 745.0318  | 2232.0736 |           |         |   |    |      |   |                                                                 |
| b | <a href="#">110</a> | 559.7715  | 2235.0571 |           |         |   |    |      |   |                                                                 |

|   |                     |          |           |
|---|---------------------|----------|-----------|
| b | <a href="#">111</a> | 746.3778 | 2236.1116 |
| b | <a href="#">113</a> | 563.0191 | 2248.0472 |
| b | <a href="#">114</a> | 563.2643 | 2249.0281 |
| b | <a href="#">115</a> | 755.6789 | 2264.0149 |
| b | <a href="#">116</a> | 567.0116 | 2264.0171 |
| b | <a href="#">118</a> | 762.0596 | 2283.1569 |
| b | <a href="#">119</a> | 762.3881 | 2284.1425 |
| b | <a href="#">122</a> | 766.7318 | 2297.1735 |
| b | <a href="#">128</a> | 772.3909 | 2314.1510 |
| b | <a href="#">129</a> | 580.7405 | 2318.9330 |
| b | <a href="#">130</a> | 585.2765 | 2337.0767 |

---

### Search Parameters

Type of search : MS/MS Ion Search  
Enzyme : Trypsin/P  
Variable modifications : Acetyl (K),Acetyl (Protein N-term),Oxidation (M)  
Mass values : Monoisotopic  
Protein Mass : Unrestricted  
Peptide Mass Tolerance :  $\pm$  0.02 Da  
Fragment Mass Tolerance:  $\pm$  0.3 Da  
Max Missed Cleavages : 1  
Instrument type : ESI-TRAP  
Number of queries : 132

Mascot: <http://www.matrixscience.com/>

**Mascot Search Results**

User : Bob  
 Email : rdenglis@utmb.edu  
 Search title : 11081917.raw #2303 Phospho  
 MS data file : tempfile  
 Database : NCBI nr 20110707 (14481393 sequences; 4958963357 residues)  
 Taxonomy : Mus musculus (house mouse) (143921 sequences)  
 Timestamp : 24 Aug 2011 at 16:32:00 GMT  
 Protein hits : [gi|124248512](#) carbamoyl-phosphate synthase [ammonia], mitochondrial precursor [Mus musculus]  
[gi|26346581](#) unnamed protein product [Mus musculus]  
[gi|51092303](#) Try10-like trypsinogen [Mus musculus]  
[gi|3093758](#) cyclic AMP specific phosphodiesterase PDE4D5A [Mus musculus]  
[gi|148677260](#) mCG126205 [Mus musculus]

NCBI nr [Decoy](#) False discovery rate

Peptide matches above identity threshold 32 2 6.25 %  
 Peptide matches above homology or identity threshold 35 2 5.71 %

**Probability Based Mowse Score**

Ions score is  $-10 \cdot \log(P)$ , where P is the probability that the observed match is a random event. Individual ions scores > 31 indicate identity or extensive homology (p<0.05). Protein scores are derived from ions scores as a non-probabilistic basis for ranking protein hits.

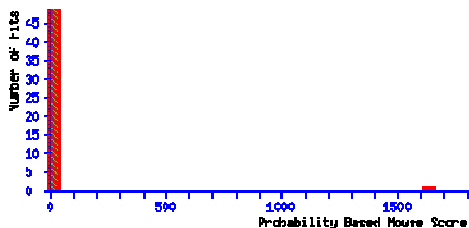

**Peptide Summary Report**

Format As  [Help](#)

Significance threshold p<  Max. number of hits

Standard scoring  MudPIT scoring  Ions score or expect cut-off  Show sub-sets

Show pop-ups  Suppress pop-ups  Sort unassigned  Require bold red

Error tolerant

1. [gi|124248512](#) Mass: 164514 Score: 1637 Queries matched: 31 emPAI: 0.66  
 carbamoyl-phosphate synthase [ammonia], mitochondrial precursor [Mus musculus]  
 Check to include this hit in error tolerant search or archive report

| Query              | Observed | Mr (expt) | Mr (calc) | Delta   | Miss | Score | Expect   | Rank | Peptide                             |
|--------------------|----------|-----------|-----------|---------|------|-------|----------|------|-------------------------------------|
| <a href="#">3</a>  | 406.2214 | 810.4282  | 810.4276  | 0.0007  | 0    | 25    | 0.3      | 1    | R.SFPFVSK.T                         |
| <a href="#">4</a>  | 406.2214 | 810.4283  | 810.4276  | 0.0007  | 0    | (18)  | 1.9      | 1    | R.SFPFVSK.T                         |
| <a href="#">19</a> | 453.2583 | 904.5021  | 904.5018  | 0.0003  | 0    | 43    | 0.0037   | 1    | K.LFAEAVQK.S                        |
| <a href="#">20</a> | 495.2797 | 988.5447  | 988.5441  | 0.0007  | 0    | 51    | 0.0027   | 1    | K.ETLIDLGTK.A                       |
| <a href="#">22</a> | 508.2393 | 1014.4641 | 1014.4658 | -0.0017 | 0    | 34    | 0.044    | 1    | R.TFEESFQK.A                        |
| <a href="#">23</a> | 508.8030 | 1015.5914 | 1015.5914 | -0.0000 | 0    | 38    | 0.0076   | 1    | K.GTTITSVLPK.P                      |
| <a href="#">25</a> | 518.7691 | 1035.5237 | 1035.5237 | 0.0000  | 0    | 38    | 0.016    | 1    | K.EIEYEVVR.D                        |
| <a href="#">27</a> | 545.7980 | 1089.5815 | 1089.5819 | -0.0004 | 0    | 46    | 0.0021   | 1    | K.VPAIYGDVTR.M                      |
| <a href="#">28</a> | 551.8086 | 1101.6027 | 1101.6030 | -0.0002 | 0    | 38    | 0.014    | 1    | K.QNLIAEVSTK.D                      |
| <a href="#">30</a> | 568.7799 | 1135.5453 | 1135.5431 | 0.0022  | 0    | 67    | 2.9e-005 | 1    | K.VMIGESIDEK.R + Oxidation (M)      |
| <a href="#">31</a> | 582.3736 | 1162.7326 | 1162.7325 | 0.0001  | 0    | 44    | 0.00015  | 1    | K.IALGIPLPEIK.N                     |
| <a href="#">35</a> | 609.3123 | 1216.6100 | 1216.6088 | 0.0012  | 0    | 58    | 0.00018  | 1    | K.SLQWLQEEK.V                       |
| <a href="#">36</a> | 611.3392 | 1220.6638 | 1220.6652 | -0.0014 | 0    | 61    | 4.3e-005 | 1    | R.SIFSAVLDELK.V                     |
| <a href="#">37</a> | 611.8458 | 1221.6770 | 1221.6757 | 0.0013  | 0    | 52    | 0.00037  | 1    | K.ATGYPLAFIAAK.I                    |
| <a href="#">38</a> | 623.8301 | 1245.6455 | 1245.6387 | 0.0068  | 0    | 52    | 0.00058  | 1    | K.IMGTSPQLIDR.A + Oxidation (M)     |
| <a href="#">40</a> | 639.8509 | 1277.6872 | 1277.6867 | 0.0005  | 0    | 66    | 1.6e-005 | 1    | K.TLGVDFIDVATK.V                    |
| <a href="#">41</a> | 649.8351 | 1297.6557 | 1297.6554 | 0.0003  | 0    | 59    | 0.0001   | 1    | K.LYFEELSLEK.I                      |
| <a href="#">44</a> | 661.8426 | 1321.6706 | 1321.6700 | 0.0006  | 0    | 68    | 1.4e-005 | 1    | K.AADTIGYVPMIR.S + Oxidation (M)    |
| <a href="#">47</a> | 677.3656 | 1352.7166 | 1352.7160 | 0.0006  | 0    | 66    | 1.8e-005 | 1    | R.GQNQPVLNITNR.Q                    |
| <a href="#">50</a> | 704.8641 | 1407.7136 | 1407.7180 | -0.0044 | 0    | (63)  | 4.8e-005 | 1    | K.AFAMTNQILVER.S + Oxidation (M)    |
| <a href="#">51</a> | 704.8666 | 1407.7186 | 1407.7180 | 0.0006  | 0    | 72    | 7.2e-006 | 1    | K.AFAMTNQILVER.S + Oxidation (M)    |
| <a href="#">53</a> | 710.8513 | 1419.6880 | 1419.6841 | 0.0038  | 0    | 77    | 2.3e-006 | 1    | K.GLNSDSVTETELR.K                   |
| <a href="#">56</a> | 760.3773 | 1518.7400 | 1518.7348 | 0.0053  | 0    | 72    | 6.1e-006 | 1    | K.ALENMNSLDEIVR.L + Oxidation (M)   |
| <a href="#">62</a> | 526.6129 | 1576.8168 | 1576.8096 | 0.0071  | 1    | 30    | 0.074    | 1    | R.QLFSDKLNINEK.I                    |
| <a href="#">63</a> | 530.2755 | 1587.8046 | 1587.8045 | 0.0001  | 0    | 15    | 3.4      | 1    | R.FLGVAEQLHNEGFK.L                  |
| <a href="#">66</a> | 812.3985 | 1622.7823 | 1622.7822 | 0.0002  | 0    | 92    | 5.5e-008 | 1    | K.VLGTSVESIMATEDR.Q + Oxidation (M) |



|   |                     |           |           |           |         |   |    |          |   |                                         |
|---|---------------------|-----------|-----------|-----------|---------|---|----|----------|---|-----------------------------------------|
| b | <a href="#">67</a>  | 812.3998  | 1622.7851 | 1622.7861 | -0.0011 | 0 | 82 | 6.2e-007 | 1 | K.IAPSFVAVESMEDALK.A + Oxidation (M)    |
| b | <a href="#">73</a>  | 862.4122  | 1722.8098 | 1722.8101 | -0.0002 | 0 | 84 | 3.6e-007 | 1 | K.IEFEGQSVDFVDPNK.Q                     |
| b | <a href="#">74</a>  | 863.9523  | 1725.8899 | 1725.8897 | 0.0002  | 0 | 67 | 1.1e-005 | 1 | R.DGSIDLVLINLPNNNTK.F                   |
| b | <a href="#">83</a>  | 1022.5412 | 2043.0678 | 2043.0670 | 0.0008  | 0 | 87 | 6.2e-008 | 1 | K.TVLMNPNIASVQTNEVGLK.Q + Oxidation (M) |
| b | <a href="#">132</a> | 936.4751  | 2806.4034 | 2806.4025 | 0.0009  | 1 | 55 | 8.4e-005 | 1 | K.IEFEGQSVDFVDPNKQNLIAEVSTK.D           |

2. [gi|26346581](#) Mass: 90810 Score: 63 Queries matched: 2 emPAI: 0.03  
 unnamed protein product [Mus musculus]  
 e Check to include this hit in error tolerant search or archive report

| Query                | Observed | Mr(expt)  | Mr(calc)  | Delta   | Miss | Score | Expect | Rank | Peptide                            |
|----------------------|----------|-----------|-----------|---------|------|-------|--------|------|------------------------------------|
| b <a href="#">45</a> | 663.8489 | 1325.6833 | 1325.6827 | 0.0007  | 0    | 59    | 0.0001 | 1    | K.GTPLDTEVPLER.V                   |
| b <a href="#">61</a> | 783.8738 | 1565.7331 | 1565.7429 | -0.0098 | 0    | 4     | 48     | 10   | K.METVVTSPMEGTIR.K + Oxidation (M) |

Proteins matching the same set of peptides:

- [gi|200246](#) Mass: 103041 Score: 61 Queries matched: 2  
pyruvate carboxylase [Mus musculus]
- [gi|464506](#) Mass: 129602 Score: 61 Queries matched: 2  
RecName: Full=Pyruvate carboxylase, mitochondrial; AltName: Full=Pyruvic carboxylase; Short=PCB; Flags: Precursor
- [gi|74186338](#) Mass: 129778 Score: 61 Queries matched: 2  
unnamed protein product [Mus musculus]
- [gi|74201750](#) Mass: 129650 Score: 61 Queries matched: 2  
unnamed protein product [Mus musculus]
- [gi|74215392](#) Mass: 129749 Score: 61 Queries matched: 2  
unnamed protein product [Mus musculus]
- [gi|251823978](#) Mass: 129618 Score: 61 Queries matched: 2  
pyruvate carboxylase, mitochondrial isoform 2 [Mus musculus]
- [gi|251823980](#) Mass: 129750 Score: 61 Queries matched: 2  
pyruvate carboxylase, mitochondrial isoform 1 [Mus musculus]

3. [gi|51092303](#) Mass: 26514 Score: 58 Queries matched: 2 emPAI: 0.25  
 Try10-like trypsinogen [Mus musculus]  
 e Check to include this hit in error tolerant search or archive report

| Query                | Observed | Mr(expt)  | Mr(calc)  | Delta   | Miss | Score | Expect  | Rank | Peptide                        |
|----------------------|----------|-----------|-----------|---------|------|-------|---------|------|--------------------------------|
| b <a href="#">32</a> | 588.3186 | 1174.6227 | 1174.6267 | -0.0040 | 0    | (45)  | 0.0027  | 1    | K.TLDNDIMLIK.L                 |
| b <a href="#">34</a> | 596.3183 | 1190.6220 | 1190.6217 | 0.0003  | 0    | 58    | 0.00014 | 1    | K.TLDNDIMLIK.L + Oxidation (M) |

Proteins matching the same set of peptides:

- [gi|84781771](#) Mass: 26204 Score: 58 Queries matched: 2  
trypsin 10 [Mus musculus]

4. [gi|3093758](#) Mass: 23890 Score: 35 Queries matched: 1 emPAI: 0.13  
 cyclic AMP specific phosphodiesterase PDE4D5A [Mus musculus]  
 e Check to include this hit in error tolerant search or archive report

| Query                | Observed | Mr(expt) | Mr(calc) | Delta  | Miss | Score | Expect | Rank | Peptide      |
|----------------------|----------|----------|----------|--------|------|-------|--------|------|--------------|
| b <a href="#">16</a> | 434.7667 | 867.5189 | 867.5178 | 0.0011 | 0    | 35    | 0.0083 | 1    | K.LSPVISPR.N |

Proteins matching the same set of peptides:

- [gi|148686495](#) Mass: 79441 Score: 35 Queries matched: 1  
phosphodiesterase 4D, cAMP specific, isoform CRA\_c [Mus musculus]

5. [gi|148677260](#) Mass: 227544 Score: 32 Queries matched: 2 emPAI: 0.01  
 mCG126205 [Mus musculus]  
 e Check to include this hit in error tolerant search or archive report

| Query                | Observed | Mr(expt)  | Mr(calc)  | Delta  | Miss | Score | Expect | Rank | Peptide                           |
|----------------------|----------|-----------|-----------|--------|------|-------|--------|------|-----------------------------------|
| b <a href="#">67</a> | 812.3998 | 1622.7851 | 1622.7796 | 0.0055 | 1    | (23)  | 0.48   | 2    | K.IQMEEFMAANPSK.I                 |
| b <a href="#">69</a> | 820.3981 | 1638.7817 | 1638.7745 | 0.0072 | 1    | 32    | 0.052  | 1    | K.IQMEEFMAANPSK.I + Oxidation (M) |

Proteins matching the same set of peptides:

- [gi|81906676](#) Mass: 227475 Score: 30 Queries matched: 2  
RecName: Full=Sodium channel protein type 5 subunit alpha; AltName: Full=Sodium channel protein cardiac muscle subunit alpha; AltName:
- [gi|84875498](#) Mass: 227559 Score: 30 Queries matched: 2  
sodium channel protein type 5 subunit alpha [Mus musculus]

Peptide matches not assigned to protein hits: (no details means no match)

| Query                | Observed | Mr(expt)  | Mr(calc)  | Delta   | Miss | Score | Expect | Rank | Peptide              |
|----------------------|----------|-----------|-----------|---------|------|-------|--------|------|----------------------|
| b <a href="#">8</a>  | 421.7576 | 841.5007  | 841.4810  | 0.0197  | 0    | 30    | 0.069  | 1    | LGTWLPR              |
| b <a href="#">26</a> | 536.3244 | 1070.6342 | 1070.6196 | 0.0145  | 1    | 24    | 0.16   | 1    | DLQLRV TAR           |
| b <a href="#">15</a> | 428.7659 | 855.5172  | 855.5112  | 0.0059  | 1    | 23    | 0.25   | 1    | ALRMLPR              |
| b <a href="#">97</a> | 737.7067 | 2210.0982 | 2210.0967 | 0.0015  | 0    | 21    | 0.46   | 1    | LGEHNINVLEGNEQFIDAAK |
| b <a href="#">92</a> | 737.7061 | 2210.0966 | 2210.0967 | -0.0001 | 0    | 19    | 0.72   | 1    | LGEHNINVLEGNEQFIDAAK |
| b <a href="#">96</a> | 737.7067 | 2210.0982 | 2210.0967 | 0.0014  | 0    | 19    | 0.76   | 1    | LGEHNINVLEGNEQFIDAAK |

|   |                     |           |           |           |         |   |    |     |   |                                                 |
|---|---------------------|-----------|-----------|-----------|---------|---|----|-----|---|-------------------------------------------------|
| b | <a href="#">60</a>  | 780.8987  | 1559.7828 | 1559.7654 | 0.0174  | 0 | 19 | 1.2 | 1 | QWGLLCDLLEQDK                                   |
| b | <a href="#">9</a>   | 421.7578  | 841.5010  | 841.5134  | -0.0123 | 1 | 17 | 1.1 | 1 | LGLRLDR                                         |
| b | <a href="#">76</a>  | 864.4443  | 1726.8740 | 1726.8638 | 0.0102  | 1 | 17 | 1.4 | 1 | GLEWIGRIDPNDGGTK                                |
| b | <a href="#">93</a>  | 737.7062  | 2210.0968 | 2210.0967 | 0.0001  | 0 | 17 | 1.2 | 1 | LGEHNINVLEGNEQFIDAAK                            |
| b | <a href="#">72</a>  | 857.4080  | 1712.8014 | 1712.8056 | -0.0041 | 1 | 17 | 1.9 | 1 | TSDPLKILANADTMK + Oxidation (M); Phospho (ST)   |
| b | <a href="#">90</a>  | 737.7051  | 2210.0934 | 2210.0967 | -0.0033 | 0 | 17 | 1.3 | 1 | LGEHNINVLEGNEQFIDAAK                            |
| b | <a href="#">10</a>  | 421.7583  | 841.5021  | 841.5021  | -0.0000 | 1 | 17 | 1.4 | 1 | LKESLPR                                         |
| b | <a href="#">33</a>  | 595.3281  | 1188.6416 | 1188.6462 | -0.0046 | 1 | 16 | 1.8 | 1 | ITDTISDRLR                                      |
| b | <a href="#">12</a>  | 421.7584  | 841.5023  | 841.5021  | 0.0002  | 0 | 16 | 1.5 | 1 | LSVALSPR                                        |
| b | <a href="#">94</a>  | 737.7065  | 2210.0975 | 2210.0967 | 0.0008  | 0 | 16 | 1.3 | 1 | LGEHNINVLEGNEQFIDAAK                            |
| b | <a href="#">95</a>  | 737.7065  | 2210.0976 | 2210.0967 | 0.0009  | 0 | 16 | 1.4 | 1 | LGEHNINVLEGNEQFIDAAK                            |
| b | <a href="#">13</a>  | 421.7588  | 841.5030  | 841.5021  | 0.0008  | 1 | 16 | 1.5 | 1 | LKESLPR                                         |
| b | <a href="#">64</a>  | 804.9007  | 1607.7868 | 1607.8017 | -0.0149 | 0 | 15 | 2.8 | 1 | LLPLELFFYLLK + Phospho (ST); Phospho (Y)        |
| b | <a href="#">14</a>  | 428.7658  | 855.5171  | 855.5112  | 0.0059  | 1 | 15 | 1.6 | 1 | ALRMLPR                                         |
| b | <a href="#">11</a>  | 421.7584  | 841.5022  | 841.4844  | 0.0178  | 0 | 14 | 2.3 | 1 | NIMVLPR                                         |
| b | <a href="#">39</a>  | 631.8241  | 1261.6336 | 1261.6159 | 0.0178  | 0 | 14 | 4.1 | 1 | GMTAEVGITMPR                                    |
| b | <a href="#">46</a>  | 673.8527  | 1345.6909 | 1345.6941 | -0.0032 | 1 | 13 | 4.3 | 1 | MAAPLRHTLLK + Oxidation (M); Phospho (ST)       |
| b | <a href="#">24</a>  | 510.7720  | 1019.5293 | 1019.5182 | 0.0111  | 1 | 12 | 6.3 | 1 | MRLDGVASR + Oxidation (M)                       |
| b | <a href="#">43</a>  | 655.8574  | 1309.7003 | 1309.7102 | -0.0099 | 1 | 12 | 3.6 | 1 | SAPQTLGGGARAPK                                  |
| b | <a href="#">48</a>  | 696.8434  | 1391.6722 | 1391.6810 | -0.0088 | 0 | 12 | 6.9 | 1 | QGSLIQVPSVER + Phospho (ST)                     |
| b | <a href="#">29</a>  | 564.2776  | 1126.5406 | 1126.5424 | -0.0018 | 0 | 12 | 7.7 | 1 | LIGSHDPVLP + Phospho (ST)                       |
| b | <a href="#">52</a>  | 710.8379  | 1419.6612 | 1419.6799 | -0.0187 | 0 | 11 | 8   | 1 | FIASFNVVNTIK + Phospho (ST)                     |
| b | <a href="#">61</a>  | 783.8738  | 1565.7331 | 1565.7169 | 0.0162  | 1 | 11 | 9.9 | 1 | VSETSGGKTSGEDANK                                |
| b | <a href="#">79</a>  | 897.9109  | 1793.8072 | 1793.8059 | 0.0013  | 1 | 10 | 10  | 1 | EFLGTTQTASFCGPKK + Phospho (ST)                 |
| b | <a href="#">21</a>  | 505.2696  | 1008.5247 | 1008.5170 | 0.0077  | 0 | 10 | 11  | 1 | MVGTVMKK                                        |
| b | <a href="#">68</a>  | 820.3962  | 1638.7779 | 1638.7800 | -0.0021 | 1 | 10 | 9.5 | 1 | GQLASKSTILCSHK + Phospho (ST)                   |
| b | <a href="#">17</a>  | 435.7732  | 869.5319  | 869.5123  | 0.0196  | 0 | 9  | 5.2 | 1 | VSLWLPR                                         |
| b | <a href="#">55</a>  | 752.8687  | 1503.7228 | 1503.7275 | -0.0047 | 1 | 9  | 13  | 1 | FFKEIWSAAAR + Phospho (ST)                      |
| b | <a href="#">49</a>  | 701.3616  | 1400.7086 | 1400.6887 | 0.0199  | 1 | 9  | 12  | 1 | LGFCEKNVILR + Phospho (ST)                      |
| b | <a href="#">75</a>  | 864.4435  | 1726.8725 | 1726.8638 | 0.0086  | 1 | 9  | 9.9 | 1 | GLEWIGRIDPNGGDTK                                |
| b | <a href="#">118</a> | 762.0596  | 2283.1569 | 2283.1399 | 0.0170  | 1 | 9  | 6.1 | 1 | EPPGKPGAEALSITPQLLK + Phospho (ST)              |
| b | <a href="#">91</a>  | 737.7060  | 2210.0961 | 2210.0967 | -0.0006 | 0 | 9  | 8.1 | 1 | LGEHNINVLEGNEQFIDAAK                            |
| b | <a href="#">77</a>  | 887.9524  | 1773.8903 | 1773.8848 | 0.0055  | 1 | 7  | 14  | 1 | AAMLSELLRYNANLTK + Oxidation (M); Phospho (ST)  |
| b | <a href="#">112</a> | 747.0484  | 2238.1235 | 2238.1158 | 0.0077  | 0 | 7  | 8.6 | 1 | DTHSLPPAQILGIQGGGIAR + Phospho (ST)             |
| b | <a href="#">98</a>  | 738.0331  | 2211.0774 | 2211.0920 | -0.0146 | 0 | 7  | 14  | 1 | LGEHNINVLEGNEQFVNSAK                            |
| b | <a href="#">57</a>  | 760.8666  | 1519.7187 | 1519.7048 | 0.0139  | 1 | 6  | 22  | 1 | ILDSSINTLTKR + 2 Phospho (ST)                   |
| b | <a href="#">71</a>  | 837.3913  | 1672.7681 | 1672.7693 | -0.0012 | 0 | 6  | 24  | 1 | DSEGGTSPSLINWPSR                                |
| b | <a href="#">86</a>  | 729.0353  | 2184.0840 | 2184.0690 | 0.0150  | 0 | 6  | 13  | 1 | MTGLESLWVSEVLQLPFR + Phospho (ST)               |
| b | <a href="#">59</a>  | 774.8672  | 1547.7197 | 1547.7345 | -0.0147 | 1 | 6  | 28  | 1 | DALEKGAVTSGPAPR + Phospho (ST)                  |
| b | <a href="#">81</a>  | 970.9710  | 1939.9274 | 1939.9172 | 0.0102  | 0 | 5  | 22  | 1 | MDQVMQFVPSQQFVK                                 |
| b | <a href="#">54</a>  | 711.3414  | 1420.6682 | 1420.6572 | 0.0109  | 1 | 5  | 32  | 1 | GRSLGAPGQQSQR + Phospho (ST)                    |
| b | <a href="#">87</a>  | 732.0302  | 2193.0687 | 2193.0711 | -0.0023 | 0 | 5  | 20  | 1 | EMPVQFQVVELPSGHHLCK + Oxidation (M)             |
| b | <a href="#">70</a>  | 830.9303  | 1659.8461 | 1659.8654 | -0.0193 | 1 | 4  | 27  | 1 | IQNTIGIKDPSCPFK                                 |
| b | <a href="#">120</a> | 762.7159  | 2285.1258 | 2285.1362 | -0.0104 | 0 | 4  | 22  | 1 | SATLMVYEDVVQIVSGFQGAR + Oxidation (M)           |
| b | <a href="#">107</a> | 742.7051  | 2225.0934 | 2225.1068 | -0.0134 | 1 | 4  | 24  | 1 | SGKIQFVMSNLPVTLWGR + Phospho (Y)                |
| b | <a href="#">18</a>  | 435.7743  | 869.5340  | 869.5487  | -0.0147 | 0 | 4  | 16  | 1 | LWVALLR                                         |
| b | <a href="#">103</a> | 742.0341  | 2223.0806 | 2223.0994 | -0.0188 | 0 | 4  | 29  | 1 | GIEFFMADLDLSPHPTQR + Oxidation (M)              |
| b | <a href="#">121</a> | 762.7219  | 2285.1438 | 2285.1362 | 0.0076  | 0 | 4  | 20  | 1 | SATLMVYEDVVQIVSGFQGAR + Oxidation (M)           |
| b | <a href="#">104</a> | 742.3763  | 2224.1071 | 2224.0889 | 0.0182  | 1 | 3  | 25  | 1 | LQGVLEGLNSKTYDTLHR + Phospho (ST)               |
| b | <a href="#">125</a> | 767.7175  | 2300.1307 | 2300.1242 | 0.0065  | 1 | 3  | 24  | 1 | LAWTRSFDFEGSLSPVIAPK + Phospho (ST)             |
| b | <a href="#">85</a>  | 1042.0088 | 2082.0030 | 2082.0164 | -0.0133 | 1 | 3  | 34  | 1 | RSPPLLAGAEGMSQAPPEAR + Oxidation (M)            |
| b | <a href="#">58</a>  | 769.3238  | 1536.6331 | 1536.6313 | 0.0018  | 0 | 3  | 57  | 1 | VTMTCVSSSVNSR + Phospho (ST)                    |
| b | <a href="#">65</a>  | 811.9087  | 1621.8029 | 1621.7835 | 0.0194  | 1 | 3  | 50  | 1 | ADSLDEFIEEQKAK                                  |
| b | <a href="#">89</a>  | 737.3617  | 2209.0632 | 2209.0586 | 0.0045  | 1 | 3  | 40  | 1 | GFMVQTGDPGTGRGGSSIWAK                           |
| b | <a href="#">100</a> | 738.0358  | 2211.0856 | 2211.1027 | -0.0171 | 1 | 2  | 34  | 1 | MLPSSMNSVEVYSGANRILK + Oxidation (M)            |
| b | <a href="#">108</a> | 742.7061  | 2225.0964 | 2225.1116 | -0.0153 | 1 | 2  | 35  | 1 | QAKVWNTYELDLVNYQNK                              |
| b | <a href="#">42</a>  | 655.3232  | 1308.6318 | 1308.6187 | 0.0131  | 1 | 2  | 74  | 1 | AETRAGGGVGLGK + Phospho (ST)                    |
| b | <a href="#">130</a> | 585.2765  | 2337.0767 | 2337.0850 | -0.0082 | 0 | 2  | 60  | 1 | GVVPLAGTNGETTQGLDDLSGR + Phospho (ST)           |
| b | <a href="#">82</a>  | 665.6230  | 1993.8471 | 1993.8414 | 0.0057  | 0 | 1  | 64  | 1 | PYLVMCSEVLGSSAGEK + Oxidation (M); Phospho (ST) |
| b | <a href="#">123</a> | 767.3908  | 2299.1505 | 2299.1501 | 0.0004  | 1 | 1  | 34  | 1 | AKFDGIFESLLPVNGLLSGDK + Phospho (ST)            |
| b | <a href="#">126</a> | 767.7196  | 2300.1370 | 2300.1228 | 0.0142  | 1 | 1  | 42  | 1 | YGRHPLEMLPLMINPTGCAR + 2 Oxidation (M)          |
| b | <a href="#">106</a> | 742.3773  | 2224.1101 | 2224.0963 | 0.0138  | 1 | 1  | 47  | 1 | MLELTDHISQIGYKVLER + Phospho (ST)               |
| b | <a href="#">116</a> | 567.0116  | 2264.0171 | 2264.0248 | -0.0076 | 1 | 1  | 79  | 1 | IGSTALLYCLCDHRLGAR + 2 Phospho (ST)             |
| b | <a href="#">131</a> | 589.2756  | 2353.0734 | 2353.0572 | 0.0161  | 0 | 0  | 72  | 1 | LEWMGYISYDGTSTNYPNLSK + Oxidation (M)           |
| b | <a href="#">78</a>  | 890.8915  | 1779.7685 | 1779.7750 | -0.0065 | 0 | 0  | 94  | 1 | LQSMDTGLPEEHLK + Oxidation (M); Phospho (ST)    |
| b | <a href="#">117</a> | 567.5103  | 2266.0119 | 2266.0080 | 0.0039  | 1 | 0  | 87  | 1 | HQGREGMQGGGAAPQCPGAGAGR + Oxidation (M)         |
| b | <a href="#">1</a>   | 384.2357  | 766.4568  |           |         |   |    |     |   |                                                 |
| b | <a href="#">2</a>   | 772.3971  | 771.3899  |           |         |   |    |     |   |                                                 |
| b | <a href="#">5</a>   | 406.2483  | 810.4821  |           |         |   |    |     |   |                                                 |
| b | <a href="#">6</a>   | 412.7527  | 823.4908  |           |         |   |    |     |   |                                                 |
| b | <a href="#">7</a>   | 412.7536  | 823.4926  |           |         |   |    |     |   |                                                 |
| b | <a href="#">80</a>  | 904.9436  | 1807.8726 |           |         |   |    |     |   |                                                 |
| b | <a href="#">84</a>  | 1033.0019 | 2063.9892 |           |         |   |    |     |   |                                                 |
| b | <a href="#">88</a>  | 1104.0584 | 2206.1022 |           |         |   |    |     |   |                                                 |
| b | <a href="#">99</a>  | 738.0352  | 2211.0838 |           |         |   |    |     |   |                                                 |
| b | <a href="#">101</a> | 738.0408  | 2211.1006 |           |         |   |    |     |   |                                                 |

|   |                     |          |           |
|---|---------------------|----------|-----------|
| b | <a href="#">102</a> | 738.0412 | 2211.1018 |
| b | <a href="#">105</a> | 742.3773 | 2224.1101 |
| b | <a href="#">109</a> | 745.0318 | 2232.0736 |
| b | <a href="#">110</a> | 559.7715 | 2235.0571 |
| b | <a href="#">111</a> | 746.3778 | 2236.1116 |
| b | <a href="#">113</a> | 563.0191 | 2248.0472 |
| b | <a href="#">114</a> | 563.2643 | 2249.0281 |
| b | <a href="#">115</a> | 755.6789 | 2264.0149 |
| b | <a href="#">119</a> | 762.3881 | 2284.1425 |
| b | <a href="#">122</a> | 766.7318 | 2297.1735 |
| b | <a href="#">124</a> | 767.3909 | 2299.1510 |
| b | <a href="#">127</a> | 767.7215 | 2300.1428 |
| b | <a href="#">128</a> | 772.3909 | 2314.1510 |
| b | <a href="#">129</a> | 580.7405 | 2318.9330 |

---

#### Search Parameters

Type of search : MS/MS Ion Search  
Enzyme : Trypsin/P  
Variable modifications : Oxidation (M),Phospho (ST),Phospho (Y)  
Mass values : Monoisotopic  
Protein Mass : Unrestricted  
Peptide Mass Tolerance :  $\pm$  0.02 Da  
Fragment Mass Tolerance:  $\pm$  0.3 Da  
Max Missed Cleavages : 1  
Instrument type : ESI-TRAP  
Number of queries : 132

Mascot: <http://www.matrixscience.com/>
